# Supplementary material for: Elucidating the mechanism and reactivity of the reaction between the donor–acceptor–acceptor 1,3-bisdiazo compound and cinnamyl alcohol catalyzed by Rh2(OAc)4: a DFT study
Source: Royal Society of Chemistry journal article supplement (doi:10.1039/d1nj05542a), 2022-01-01
Supplement: d1nj05542a1.pdf [file d1nj05542a1.pdf]

## Supporting Information

### **Elucidating mechanism and reactivity of reaction between donor-acceptor-acceptor 1,3-bisdiazo compound and cinnamyl alcohol catalyzed by $\text{Rh}_2(\text{OAc})_4$ : a DFT study**

Yan Zhang, Yongsheng Yang, Ying Xue\*

College of Chemistry,  
Key Lab of Green Chemistry and Technology in Ministry of Education,  
Sichuan University, Chengdu 610064,  
People's Republic of China

**The Cartesian Coordinates (Å) for Ground state and Transition State Geometries  
Optimized in the Gas Phase and CHCl<sub>3</sub> Solvent**

1a

0 1

|    |             |             |             |
|----|-------------|-------------|-------------|
| Br | 5.33634400  | -0.03319400 | -0.31624100 |
| O  | -1.37188900 | 2.17883200  | -0.01915900 |
| N  | -1.29185100 | -1.11009000 | 1.13201100  |
| C  | 1.36380900  | 1.17932000  | 0.11422900  |
| H  | 0.82056500  | 2.11355700  | 0.10165800  |
| O  | -3.20169900 | -1.54210500 | -0.75634900 |
| N  | -1.68433800 | -2.02439900 | 1.67999900  |
| C  | 2.74314000  | 1.17329500  | -0.08273900 |
| H  | 3.27122800  | 2.10578500  | -0.24679600 |
| O  | -5.16121500 | -0.42496800 | -0.49427800 |
| N  | -3.98170900 | 1.74436900  | 0.19949000  |
| C  | 3.44241500  | -0.03052700 | -0.05705500 |
| N  | -4.62483000 | 2.66260700  | 0.33627600  |
| C  | 2.77614800  | -1.23587000 | 0.15598800  |
| H  | 3.32560100  | -2.17018000 | 0.16748300  |
| C  | 1.39770600  | -1.22730400 | 0.34069900  |
| H  | 0.88943700  | -2.17619400 | 0.48344200  |
| C  | 0.66846700  | -0.02410300 | 0.32613000  |
| C  | -0.79792300 | -0.04716000 | 0.52784000  |
| C  | -1.73836800 | 1.02058900  | 0.16990600  |
| C  | -3.19208700 | 0.69015100  | 0.06511700  |
| C  | -3.81508500 | -0.54496100 | -0.43246900 |
| C  | -5.85249700 | -1.57852300 | -1.01171900 |
| H  | -5.66175300 | -2.45163600 | -0.38310900 |
| H  | -5.52475300 | -1.79609100 | -2.03114200 |
| H  | -6.90917100 | -1.31438500 | -0.99480900 |

1a-h

0 1

|    |             |             |             |
|----|-------------|-------------|-------------|
| Br | 3.66852200  | -2.12450500 | 0.06952600  |
| O  | -3.37672600 | -2.26218600 | 0.51511100  |
| N  | -2.49420100 | 0.57988200  | -1.30089300 |
| C  | -0.49356400 | -2.12936000 | 0.11819500  |
| H  | -1.26508200 | -2.84691000 | 0.35838000  |
| O  | -4.02266000 | 1.89749300  | 0.51815000  |
| N  | -2.66614600 | 1.44464400  | -2.01633800 |
| C  | 0.84820300  | -2.47016400 | 0.26192100  |
| H  | 1.11838800  | -3.46179700 | 0.60658600  |
| O  | -6.23119900 | 1.37239500  | 0.57381800  |

|   |             |             |             |
|---|-------------|-------------|-------------|
| N | -5.77359900 | -1.13807800 | 0.30433200  |
| C | 1.85240400  | -1.56296100 | -0.06708600 |
| N | -6.65676700 | -1.83699600 | 0.38647000  |
| C | 1.53202800  | -0.26794000 | -0.51197800 |
| C | 0.17672200  | 0.06187600  | -0.63509100 |
| H | -0.06456100 | 1.07323900  | -0.94794400 |
| C | -0.84930100 | -0.85039100 | -0.34311400 |
| C | -2.26280500 | -0.44428400 | -0.50240400 |
| C | -3.42540600 | -1.10533800 | 0.10165100  |
| C | -4.71334200 | -0.35376600 | 0.18540100  |
| C | -4.91794000 | 1.08072700  | 0.43554600  |
| C | -6.52098200 | 2.75386600  | 0.86556600  |
| H | -6.15954100 | 3.39775600  | 0.06030300  |
| H | -6.04549400 | 3.05484400  | 1.80212100  |
| H | -7.60564600 | 2.81071500  | 0.94799400  |
| C | 2.56378800  | 0.74485900  | -0.85040600 |
| C | 3.55934600  | 1.29971000  | 0.07960000  |
| C | 3.45856200  | 1.02533900  | 1.45507300  |
| C | 4.61385800  | 2.11620700  | -0.36735000 |
| C | 4.38719000  | 1.54946400  | 2.35019900  |
| H | 2.65174600  | 0.39899900  | 1.81952900  |
| C | 5.53367200  | 2.64221000  | 0.53541300  |
| H | 4.71978200  | 2.33696100  | -1.42555700 |
| C | 5.42909700  | 2.36176500  | 1.89949500  |
| H | 4.29164100  | 1.32225400  | 3.40800800  |
| H | 6.34029800  | 3.27021100  | 0.16833900  |
| H | 6.15035600  | 2.76997100  | 2.60063900  |
| N | 2.51091300  | 1.22320600  | -2.06573600 |
| N | 2.49198900  | 1.65004400  | -3.12958000 |

1-int2

0 1

|    |             |             |             |
|----|-------------|-------------|-------------|
| Rh | -1.10004900 | -1.16549200 | -0.44109400 |
| C  | -2.85480900 | -2.54139400 | -2.28126000 |
| O  | -1.61529500 | -2.35588600 | -2.03970700 |
| C  | -2.23392100 | 1.10183800  | -1.83433600 |
| O  | -3.35304600 | 0.77608400  | -1.32212600 |
| C  | -1.67792800 | 0.54397700  | 1.82876900  |
| O  | -2.91016000 | 0.40754300  | 1.53855000  |
| C  | -2.29660200 | -3.07758600 | 1.37435600  |
| O  | -1.18911500 | -2.80992900 | 0.79372900  |
| Rh | -3.43319900 | -0.81556300 | -0.03255300 |
| O  | -3.38302000 | -2.43739800 | 1.23027900  |
| O  | -1.12313200 | 0.50451900  | -1.63134700 |

|    |             |             |             |
|----|-------------|-------------|-------------|
| O  | -0.71497000 | 0.00100400  | 1.18803000  |
| O  | -3.82554500 | -2.05626300 | -1.61755400 |
| C  | -3.19824900 | -3.38558600 | -3.48428700 |
| H  | -2.41909900 | -4.12833400 | -3.66314900 |
| H  | -4.16860900 | -3.86438300 | -3.34620500 |
| H  | -3.25685400 | -2.73247400 | -4.36159300 |
| C  | -2.29359300 | -4.26448100 | 2.30615900  |
| H  | -2.04851700 | -5.16694300 | 1.73825500  |
| H  | -1.51427200 | -4.12976000 | 3.06154900  |
| H  | -3.26554700 | -4.38019600 | 2.78510700  |
| C  | -1.31293700 | 1.41296100  | 3.00226100  |
| H  | -0.24001800 | 1.60589200  | 3.00888500  |
| H  | -1.87348900 | 2.34889800  | 2.94213900  |
| H  | -1.60851900 | 0.90258500  | 3.92463800  |
| C  | -2.19515500 | 2.30011300  | -2.74773600 |
| H  | -1.86139800 | 1.98376500  | -3.74036800 |
| H  | -3.17540000 | 2.77098400  | -2.80496200 |
| H  | -1.46681500 | 3.01733600  | -2.36008500 |
| Br | 7.92022100  | 0.63393900  | -1.27939300 |
| O  | 2.01456200  | -0.04804200 | 3.16891100  |
| C  | 4.59177800  | 1.14562800  | 1.17799100  |
| H  | 4.38618600  | 1.47003700  | 2.19355000  |
| O  | 1.20854100  | -1.50564600 | -0.77462200 |
| C  | 5.89914900  | 1.10687600  | 0.70024400  |
| H  | 6.73133400  | 1.39160300  | 1.33411800  |
| O  | 1.75954900  | -3.52617600 | 0.07031300  |
| N  | 1.98631500  | -2.58658900 | 2.46281300  |
| C  | 6.12773400  | 0.69282100  | -0.61385600 |
| N  | 2.05315400  | -3.29110800 | 3.34115900  |
| C  | 5.07565200  | 0.32575200  | -1.45053800 |
| H  | 5.27274800  | 0.01667500  | -2.47079400 |
| C  | 3.76916200  | 0.36989300  | -0.95914700 |
| H  | 2.94061400  | 0.08250800  | -1.59859200 |
| C  | 3.51970700  | 0.77537700  | 0.35550200  |
| C  | 2.10351200  | 0.82798400  | 0.91759500  |
| C  | 1.96729700  | -0.27752500 | 1.97524200  |
| C  | 1.89855800  | -1.68840000 | 1.49201000  |
| C  | 1.59812900  | -2.20624700 | 0.16766900  |
| C  | 1.30420300  | -4.12545600 | -1.16860400 |
| H  | 1.90575200  | -3.75722700 | -2.00230700 |
| H  | 0.25379300  | -3.88268500 | -1.33751100 |
| H  | 1.44827700  | -5.19603600 | -1.03087900 |
| C  | -0.53319400 | 4.43590800  | 0.56306900  |
| C  | 0.14191000  | 3.29101800  | 0.38044000  |

|   |             |            |             |
|---|-------------|------------|-------------|
| H | 0.01926500  | 5.30254000 | 0.93028400  |
| H | -0.34638600 | 2.40403600 | -0.01729000 |
| C | 1.60359000  | 3.14731200 | 0.69297300  |
| H | 2.19414800  | 3.01550500 | -0.22648200 |
| H | 1.98062000  | 4.04264100 | 1.19767600  |
| O | 1.84836400  | 2.05009400 | 1.58600100  |
| H | 1.38220900  | 0.64675700 | 0.11855900  |
| C | -1.95838100 | 4.67562600 | 0.28600900  |
| C | -2.41018800 | 5.98830300 | 0.06215600  |
| C | -2.89986700 | 3.63308100 | 0.23456700  |
| C | -3.74768600 | 6.24492800 | -0.23701600 |
| H | -1.70024800 | 6.81053400 | 0.11128100  |
| C | -4.23528200 | 3.88638000 | -0.06770300 |
| H | -2.59943400 | 2.61543100 | 0.44266100  |
| C | -4.66553200 | 5.19408500 | -0.30910200 |
| H | -4.07373800 | 7.26603000 | -0.41438500 |
| H | -4.93305900 | 3.05565400 | -0.11180500 |
| H | -5.70765200 | 5.39378700 | -0.54147400 |

1-int3

0 1

|    |             |             |             |
|----|-------------|-------------|-------------|
| Rh | 1.45768400  | 2.96015700  | -0.15486100 |
| C  | 2.18286100  | 0.95326800  | -2.11911200 |
| O  | 2.50235400  | 2.10838800  | -1.70878900 |
| C  | -0.89617400 | 3.01006400  | -1.78280900 |
| O  | -1.14646000 | 1.83997900  | -1.33582900 |
| C  | -0.55011200 | 2.89126700  | 1.93193600  |
| O  | -0.82817000 | 1.69697500  | 1.56571300  |
| C  | 2.55937100  | 0.95342300  | 1.59028100  |
| O  | 2.76705300  | 2.13639900  | 1.18604400  |
| Rh | 0.15378500  | 0.88787800  | -0.05413200 |
| O  | 1.58779400  | 0.20043400  | 1.23423400  |
| O  | 0.10825100  | 3.72431100  | -1.48914800 |
| O  | 0.31396500  | 3.65549900  | 1.40977300  |
| O  | 1.23971700  | 0.21966500  | -1.66015500 |
| C  | 2.99998200  | 0.35153600  | -3.23580600 |
| H  | 3.70605200  | -0.36059500 | -2.79725500 |
| H  | 2.35035300  | -0.19719000 | -3.92066300 |
| H  | 3.55326600  | 1.12865600  | -3.76338000 |
| C  | 3.54664700  | 0.35228100  | 2.55748400  |
| H  | 4.10347000  | 1.14181700  | 3.06318200  |
| H  | 3.02545400  | -0.27948600 | 3.27912200  |
| H  | 4.24806800  | -0.27824200 | 2.00212700  |
| C  | -1.35125700 | 3.41819000  | 3.09888600  |

|    |             |             |             |
|----|-------------|-------------|-------------|
| H  | -1.25923500 | 2.72878000  | 3.94264800  |
| H  | -1.00446200 | 4.41128000  | 3.38388100  |
| H  | -2.40793100 | 3.45912000  | 2.81786900  |
| C  | -1.91626400 | 3.57266500  | -2.74244300 |
| H  | -2.87085800 | 3.68860500  | -2.22066100 |
| H  | -1.58479100 | 4.53663300  | -3.12838400 |
| H  | -2.07207000 | 2.86496900  | -3.56070100 |
| Br | 5.44976500  | -2.62896800 | 0.78902000  |
| O  | -1.64623500 | -1.16423900 | -2.23033800 |
| C  | 2.06586100  | -2.86286500 | -1.63204700 |
| H  | 1.85784900  | -2.87556200 | -2.69810700 |
| O  | -1.57930600 | -1.65315500 | 1.98127100  |
| C  | 3.38603500  | -2.77931700 | -1.19397300 |
| H  | 4.20620400  | -2.74326500 | -1.90211700 |
| O  | -3.00317200 | -0.15594000 | 1.02102800  |
| C  | 3.63836200  | -2.75621500 | 0.17707900  |
| C  | 2.60340600  | -2.82102400 | 1.10708000  |
| H  | 2.81833500  | -2.79600300 | 2.16861600  |
| C  | 1.28728000  | -2.90205700 | 0.65531600  |
| H  | 0.46898200  | -2.93052300 | 1.36616800  |
| C  | 1.01226600  | -2.92520000 | -0.71598400 |
| C  | -0.41384700 | -2.98422600 | -1.20812200 |
| C  | -1.07431200 | -1.58408400 | -1.23554100 |
| C  | -0.99679900 | -0.69103600 | -0.06245800 |
| C  | -1.90568900 | -0.89881300 | 1.08210800  |
| C  | -3.83683500 | -0.14857900 | 2.20026100  |
| H  | -3.33370500 | 0.41947300  | 2.98664600  |
| H  | -4.03264900 | -1.16641900 | 2.53922600  |
| H  | -4.76276600 | 0.33241500  | 1.89251400  |
| C  | -4.27819400 | -2.54256800 | -0.93547000 |
| C  | -3.53518200 | -3.42568400 | -0.25245200 |
| H  | -4.03819800 | -2.36668400 | -1.98357400 |
| H  | -3.67774300 | -3.55901300 | 0.81831000  |
| C  | -2.44373200 | -4.24646000 | -0.87547900 |
| H  | -2.56340100 | -5.30285300 | -0.60860000 |
| H  | -2.47760300 | -4.16799900 | -1.97074100 |
| O  | -1.13631700 | -3.88790600 | -0.38936000 |
| H  | -0.44079400 | -3.30307300 | -2.26228800 |
| C  | -5.36141600 | -1.71825800 | -0.37933900 |
| C  | -5.59373900 | -0.43880100 | -0.91288900 |
| C  | -6.16631000 | -2.15878400 | 0.68521500  |
| C  | -6.58049200 | 0.38735400  | -0.37809200 |
| H  | -4.97078400 | -0.08683900 | -1.73046200 |
| C  | -7.15816600 | -1.33518700 | 1.21585100  |

|   |             |             |             |
|---|-------------|-------------|-------------|
| H | -6.02227200 | -3.15901000 | 1.08319400  |
| C | -7.36637300 | -0.05710300 | 0.68983500  |
| H | -6.73802800 | 1.37822500  | -0.79441400 |
| H | -7.77560400 | -1.69372700 | 2.03460500  |
| H | -8.14187600 | 0.58278400  | 1.10078400  |

1-int4

0 1

|    |             |             |             |
|----|-------------|-------------|-------------|
| Rh | 3.30535500  | -1.90776000 | -0.42045100 |
| C  | 2.95734500  | 0.78155600  | -1.78080600 |
| O  | 3.67288300  | -0.20976100 | -1.67619200 |
| C  | 3.30963800  | -0.29533400 | 1.99765800  |
| O  | 2.08192400  | -0.01811500 | 1.77537800  |
| C  | 1.44826400  | -3.36493400 | 1.23734600  |
| O  | 0.60129100  | -2.41976500 | 1.08033800  |
| C  | 1.18895500  | -2.47758000 | -2.29017300 |
| O  | 2.40304200  | -2.77518200 | -2.04462100 |
| Rh | 1.16204900  | -0.76905000 | 0.06740200  |
| O  | 0.46440200  | -1.65243300 | -1.64633100 |
| O  | 4.07511100  | -0.98526900 | 1.25940900  |
| O  | 2.62452600  | -3.42242100 | 0.75857100  |
| O  | 1.93550100  | 0.94851600  | -0.89755600 |
| C  | 3.14594000  | 1.78972300  | -2.87073800 |
| H  | 2.18905300  | 2.00824400  | -3.35317500 |
| H  | 3.53893400  | 2.72441100  | -2.46364000 |
| H  | 3.84730100  | 1.37836900  | -3.59533600 |
| C  | 0.52150100  | -3.18025300 | -3.44866600 |
| H  | 1.26714400  | -3.54069100 | -4.15861200 |
| H  | -0.03631000 | -4.03798300 | -3.05809400 |
| H  | -0.19100600 | -2.50858700 | -3.93066400 |
| C  | 0.99397100  | -4.51147200 | 2.10788300  |
| H  | 1.58824500  | -5.40211500 | 1.90143900  |
| H  | 1.12979500  | -4.22990500 | 3.15751900  |
| H  | -0.06814000 | -4.70349200 | 1.94544400  |
| C  | 3.89096300  | 0.25019000  | 3.28339400  |
| H  | 3.63829000  | -0.43838100 | 4.09671200  |
| H  | 4.97714300  | 0.32036900  | 3.21262700  |
| H  | 3.44961000  | 1.22044300  | 3.52106800  |
| Br | -8.21837500 | -0.63344500 | -0.12032500 |
| O  | -1.32870700 | 0.42435300  | -2.02399800 |
| C  | -4.49844700 | 0.61890200  | -1.53210900 |
| H  | -3.93490200 | 0.54892900  | -2.45747900 |
| O  | -2.21226100 | -0.70596700 | 1.41673700  |
| C  | -5.76781600 | 0.05085200  | -1.44764800 |

|   |             |             |             |
|---|-------------|-------------|-------------|
| H | -6.20773900 | -0.44941300 | -2.30276200 |
| O | -0.76415500 | 0.51168100  | 2.66007000  |
| C | -6.46812500 | 0.13491500  | -0.24488400 |
| C | -5.91753400 | 0.76796900  | 0.86712400  |
| H | -6.47361500 | 0.81854400  | 1.79636200  |
| C | -4.64352900 | 1.32723400  | 0.77220500  |
| H | -4.19857900 | 1.81296300  | 1.63182200  |
| C | -3.92954200 | 1.26035200  | -0.42602400 |
| C | -2.54900600 | 1.86578800  | -0.55661000 |
| C | -1.46311700 | 0.79234600  | -0.87483600 |
| C | -0.52490300 | 0.55622600  | 0.29459300  |
| C | -1.27127800 | 0.06636300  | 1.47874100  |
| C | -1.35711800 | -0.07723300 | 3.82397500  |
| H | -1.19720900 | -1.15916800 | 3.82810100  |
| H | -2.43276200 | 0.11815700  | 3.85390600  |
| H | -0.85904800 | 0.38610000  | 4.67668700  |
| C | 1.14724300  | 2.22370500  | -0.69061700 |
| C | 0.17466200  | 1.92672900  | 0.46913700  |
| H | 0.60037000  | 2.37828400  | -1.62487700 |
| H | 0.75103800  | 1.88573900  | 1.39259000  |
| C | -0.88302700 | 3.08299300  | 0.57271500  |
| H | -0.73879000 | 3.64672300  | 1.49526700  |
| H | -0.78757600 | 3.78989000  | -0.26957700 |
| O | -2.20859200 | 2.58051700  | 0.62310800  |
| H | -2.53515300 | 2.55096100  | -1.42284500 |
| C | 2.08013000  | 3.36433700  | -0.38735300 |
| C | 1.97631500  | 4.57114900  | -1.08742500 |
| C | 3.03434200  | 3.23522500  | 0.63253400  |
| C | 2.81589500  | 5.64181300  | -0.77193600 |
| H | 1.24030600  | 4.67290900  | -1.88094500 |
| C | 3.88274900  | 4.29845600  | 0.93380700  |
| H | 3.10073700  | 2.30110100  | 1.18025900  |
| C | 3.77362900  | 5.50439600  | 0.23407100  |
| H | 2.72641000  | 6.57659900  | -1.31689200 |
| H | 4.62506500  | 4.18914400  | 1.71872500  |
| H | 4.43301300  | 6.33314300  | 0.47351400  |

1-int5

O 1

|    |            |             |             |
|----|------------|-------------|-------------|
| Rh | 2.29820200 | -2.49497700 | -0.46588200 |
| C  | 4.76648900 | -1.01786900 | -0.76628400 |
| O  | 4.27353600 | -2.18216700 | -0.91493300 |
| C  | 2.84529800 | -1.92706700 | 2.31666500  |
| O  | 2.62006800 | -0.69857400 | 2.05641700  |



|    |             |             |             |
|----|-------------|-------------|-------------|
| C  | -0.33248900 | -1.68393300 | 0.34468400  |
| O  | 0.17974400  | -0.53151100 | 0.54149900  |
| C  | 1.50383200  | -0.77074400 | -2.63042800 |
| O  | 1.73700000  | -1.99592000 | -2.37104600 |
| Rh | 2.14794700  | -0.18573700 | 0.12827900  |
| O  | 1.67655900  | 0.20274600  | -1.82614700 |
| O  | 2.80715600  | -2.88687800 | 1.48078000  |
| O  | 0.31804900  | -2.71726200 | -0.02394000 |
| O  | 4.14320100  | 0.00879900  | -0.33621800 |
| C  | 6.20874000  | -0.82362600 | -1.16554200 |
| H  | 6.23886600  | -0.47804100 | -2.20450400 |
| H  | 6.67428700  | -0.06117500 | -0.53866500 |
| H  | 6.75194600  | -1.76698000 | -1.09812900 |
| C  | 0.93742900  | -0.43403700 | -3.98406500 |
| H  | 1.06674600  | -1.26516900 | -4.67754700 |
| H  | -0.12892200 | -0.22840600 | -3.84539200 |
| H  | 1.40841800  | 0.47192500  | -4.37217500 |
| C  | -1.81833300 | -1.81502900 | 0.53378900  |
| H  | -2.09409000 | -2.85829500 | 0.68965400  |
| H  | -2.15197400 | -1.18115300 | 1.35561600  |
| H  | -2.30584500 | -1.44529300 | -0.37408200 |
| C  | 3.15258400  | -2.28190900 | 3.75078900  |
| H  | 2.23012300  | -2.62554500 | 4.23113800  |
| H  | 3.87492600  | -3.09927800 | 3.78732100  |
| H  | 3.52594000  | -1.40955100 | 4.28840800  |
| Br | -6.98135300 | -2.26628800 | 0.80440500  |
| O  | -1.36637800 | 0.61228500  | -1.74202200 |
| C  | -4.48669600 | -0.11075400 | -1.74805200 |
| H  | -4.03576200 | -0.25995500 | -2.72441400 |
| O  | -2.03779800 | 1.21387400  | 1.63303800  |
| C  | -5.30335100 | -1.10459900 | -1.21011400 |
| H  | -5.50422500 | -2.01544400 | -1.76225700 |
| O  | 0.07881300  | 1.97243000  | 1.84996400  |
| C  | -5.86290800 | -0.90853100 | 0.05231300  |
| C  | -5.62022200 | 0.25754900  | 0.77643900  |
| H  | -6.05805900 | 0.38984400  | 1.75896300  |
| C  | -4.79539900 | 1.23967400  | 0.23066000  |
| H  | -4.57361600 | 2.13879100  | 0.79085000  |
| C  | -4.22780200 | 1.06394900  | -1.03392800 |
| C  | -3.24910200 | 2.07987700  | -1.58649700 |
| C  | -1.82406100 | 1.60144300  | -1.20917000 |
| C  | -1.07500300 | 2.42594000  | -0.17822400 |
| C  | -1.06473700 | 1.78749200  | 1.18338200  |
| C  | 0.16748500  | 1.32800200  | 3.13520200  |

|   |             |            |             |
|---|-------------|------------|-------------|
| H | 0.12317200  | 0.24675200 | 2.99628600  |
| H | -0.64616200 | 1.65772000 | 3.78585300  |
| H | 1.13824000  | 1.61918800 | 3.53268100  |
| C | -0.02690300 | 3.40469800 | -0.72034700 |
| C | -1.36133400 | 3.91937500 | -0.25391500 |
| H | 0.08112700  | 3.32402500 | -1.80165700 |
| H | -1.39622200 | 4.43459600 | 0.70137800  |
| C | -2.46330500 | 4.27769400 | -1.23590000 |
| H | -2.86336500 | 5.27441500 | -1.03720800 |
| H | -2.08889500 | 4.26520000 | -2.27270800 |
| O | -3.56039600 | 3.37381200 | -1.09742300 |
| H | -3.28340200 | 2.07064700 | -2.68935600 |
| C | 1.26984800  | 3.68037900 | -0.02437500 |
| C | 2.40594700  | 2.96014600 | -0.42503700 |
| C | 1.39304500  | 4.60809200 | 1.01362900  |
| C | 3.62357400  | 3.12052600 | 0.24037700  |
| H | 2.33097900  | 2.27477800 | -1.26183100 |
| C | 2.61366000  | 4.78235200 | 1.66878800  |
| H | 0.53423200  | 5.19378800 | 1.32574900  |
| C | 3.72854600  | 4.02937000 | 1.29598600  |
| H | 4.47303100  | 2.51806000 | -0.06253600 |
| H | 2.69044100  | 5.50642200 | 2.47527400  |
| H | 4.67329100  | 4.15651800 | 1.81658400  |

1-TS1(2-TS1)

O 1

|    |             |             |             |
|----|-------------|-------------|-------------|
| Rh | 0.63629500  | 0.40872900  | -0.00549500 |
| C  | 0.59461000  | 2.11247200  | 2.35538800  |
| O  | -0.01937900 | 1.12849200  | 1.80895800  |
| C  | -0.19900800 | 2.91354100  | -1.21676500 |
| O  | 0.93028300  | 3.39977800  | -0.90175900 |
| C  | 2.39656000  | 0.52708500  | -2.33120200 |
| O  | 2.94749400  | 1.54696000  | -1.81738100 |
| C  | 3.17842400  | -0.31681900 | 1.19645400  |
| O  | 2.00450800  | -0.77626300 | 0.97137200  |
| Rh | 2.30730500  | 2.18932800  | 0.02034100  |
| O  | 3.58727300  | 0.85042200  | 0.92876900  |
| O  | -0.60332200 | 1.72436300  | -0.98121300 |
| O  | 1.45803400  | -0.16562500 | -1.80802900 |
| O  | 1.57489500  | 2.74161300  | 1.86314200  |
| C  | 0.09137700  | 2.52841200  | 3.71672900  |
| H  | 0.29247200  | 1.72383000  | 4.43091200  |
| H  | 0.58547100  | 3.44292900  | 4.04418200  |
| H  | -0.99171600 | 2.67197500  | 3.68109200  |

|    |             |             |             |
|----|-------------|-------------|-------------|
| C  | 4.14730000  | -1.28626500 | 1.83016800  |
| H  | 4.26292800  | -2.14731900 | 1.16597500  |
| H  | 5.11161900  | -0.80993200 | 2.00495400  |
| H  | 3.72993700  | -1.65022300 | 2.77356800  |
| C  | 2.88040600  | 0.06906500  | -3.68583800 |
| H  | 3.29268400  | -0.94029800 | -3.60168900 |
| H  | 2.03056700  | 0.01740700  | -4.37185300 |
| H  | 3.63888300  | 0.75037500  | -4.07094100 |
| C  | -1.15899100 | 3.80540900  | -1.96725000 |
| H  | -1.04490400 | 3.61535600  | -3.03974400 |
| H  | -2.18803400 | 3.56830300  | -1.69101800 |
| H  | -0.93349500 | 4.85455300  | -1.77236800 |
| Br | -6.93097700 | -0.00552000 | -0.01780800 |
| O  | -0.76165400 | -2.08342900 | -2.13063200 |
| N  | -0.65476400 | -1.71184000 | 1.64274500  |
| C  | -3.23237000 | -1.83286900 | -0.56006000 |
| H  | -2.87501300 | -2.76370200 | -0.98315300 |
| O  | 0.71564400  | -3.83726900 | 1.48516300  |
| N  | -0.63963000 | -1.48944100 | 2.73069500  |
| C  | -4.59718300 | -1.57141500 | -0.56154300 |
| H  | -5.29755800 | -2.29211800 | -0.96714800 |
| O  | 2.64165500  | -4.10387700 | 0.32191700  |
| N  | 1.60878100  | -3.17396200 | -1.82972200 |
| C  | -5.05887800 | -0.36675400 | -0.02648200 |
| N  | 2.21317700  | -3.29757100 | -2.77568200 |
| C  | -4.17632900 | 0.57359500  | 0.50510500  |
| H  | -4.55302200 | 1.50193800  | 0.91876500  |
| C  | -2.81095000 | 0.30664300  | 0.49258800  |
| H  | -2.11930300 | 1.02840700  | 0.90520600  |
| C  | -2.31597200 | -0.89558800 | -0.04413700 |
| C  | -0.85566400 | -1.16118400 | -0.02519200 |
| C  | -0.32137300 | -2.17210100 | -0.98629000 |
| C  | 0.87818700  | -3.01012900 | -0.73916400 |
| C  | 1.36990700  | -3.66125200 | 0.47581200  |
| C  | 3.15697500  | -4.86578100 | 1.42963400  |
| H  | 2.52975800  | -5.74044900 | 1.61903700  |
| H  | 3.19181500  | -4.25001700 | 2.33128900  |
| H  | 4.16052900  | -5.16839600 | 1.13169600  |

1-TS1'

O 1

|    |             |             |            |
|----|-------------|-------------|------------|
| Rh | 1.40737000  | 0.05042000  | 0.18466700 |
| C  | -0.29115200 | -2.23702100 | 0.73702300 |
| O  | -0.20503600 | -0.97596100 | 0.94207000 |

|    |             |             |             |
|----|-------------|-------------|-------------|
| C  | 3.11574900  | -1.43046800 | 2.02383500  |
| O  | 3.20945900  | -2.34008700 | 1.14857100  |
| C  | 3.93669600  | 0.19628400  | -1.23644600 |
| O  | 3.87912500  | -1.06130900 | -1.38014000 |
| C  | 0.55879000  | -0.69902300 | -2.50783300 |
| O  | 0.43774900  | 0.21139100  | -1.61758300 |
| Rh | 2.25243500  | -2.08553400 | -0.64664800 |
| O  | 1.26173300  | -1.74796800 | -2.40715100 |
| O  | 2.45326900  | -0.34111400 | 1.90252400  |
| O  | 3.08078700  | 0.93011200  | -0.63151400 |
| O  | 0.55688900  | -2.95524600 | 0.12770400  |
| C  | -1.53535300 | -2.90697100 | 1.26812900  |
| H  | -2.40297000 | -2.53108200 | 0.71716000  |
| H  | -1.46495700 | -3.98860600 | 1.15571400  |
| H  | -1.67319300 | -2.64082800 | 2.31953300  |
| C  | -0.24277500 | -0.50360600 | -3.77063400 |
| H  | -1.25337400 | -0.89212400 | -3.60333800 |
| H  | -0.32265700 | 0.55871800  | -4.00653200 |
| H  | 0.21032100  | -1.05765600 | -4.59346100 |
| C  | 5.11175900  | 0.92222400  | -1.84752700 |
| H  | 4.76227500  | 1.48748300  | -2.71760500 |
| H  | 5.52088000  | 1.63587500  | -1.12819800 |
| H  | 5.87814900  | 0.21344700  | -2.16102600 |
| C  | 3.85090000  | -1.61356900 | 3.32844300  |
| H  | 4.65486600  | -0.87355500 | 3.39053100  |
| H  | 3.16928100  | -1.42942600 | 4.16256500  |
| H  | 4.27070900  | -2.61729800 | 3.39174100  |
| Br | -7.37964600 | -0.78382600 | 0.15584500  |
| O  | -1.29497800 | 1.76282800  | 2.14887000  |
| N  | -1.42680100 | 2.23990000  | -1.34164200 |
| C  | -3.39633600 | 0.21707900  | 0.89683700  |
| H  | -2.61751500 | -0.10766600 | 1.57248700  |
| O  | 0.96819700  | 3.50273700  | -0.88965500 |
| N  | -1.25525800 | 2.60257100  | -2.40216700 |
| C  | -4.65471300 | -0.37435600 | 0.95691300  |
| H  | -4.85515400 | -1.15520900 | 1.68203200  |
| O  | 2.43007700  | 3.44794500  | 0.84017300  |
| N  | 1.13142500  | 2.05132900  | 2.60084900  |
| C  | -5.65538500 | 0.03572000  | 0.07532200  |
| N  | 1.67185300  | 1.69237600  | 3.49864900  |
| C  | -5.41029800 | 1.03546400  | -0.86300100 |
| H  | -6.19315400 | 1.35223500  | -1.54246800 |
| C  | -4.15056000 | 1.62976000  | -0.91208800 |
| H  | -3.97432600 | 2.41497400  | -1.64172000 |

|   |             |            |             |
|---|-------------|------------|-------------|
| C | -3.12625100 | 1.23183300 | -0.03859800 |
| C | -1.76798100 | 1.82235500 | -0.13794700 |
| C | -0.85407800 | 1.88516600 | 1.00941000  |
| C | 0.64027600  | 1.88562300 | 0.78219700  |
| C | 1.34232800  | 3.04923000 | 0.17476800  |
| C | 3.26244900  | 4.39221700 | 0.13597800  |
| H | 2.69056600  | 5.28192700 | -0.13700000 |
| H | 3.66212000  | 3.92147200 | -0.76503700 |
| H | 4.06342000  | 4.64386400 | 0.82973900  |

1-TS1-h

O 1

|    |             |             |             |
|----|-------------|-------------|-------------|
| Rh | 1.69111600  | -0.40035200 | -0.19338400 |
| C  | 1.33440900  | -1.01311800 | 2.63540000  |
| O  | 0.94795800  | -0.22138900 | 1.71331000  |
| C  | 4.33225200  | 0.22895800  | 0.85697300  |
| O  | 4.49184800  | -1.00392800 | 1.10983000  |
| C  | 3.33655100  | -1.74802600 | -2.17394600 |
| O  | 3.71584000  | -2.53086600 | -1.25587700 |
| C  | 0.32834100  | -2.96211000 | -0.36242200 |
| O  | 0.16662300  | -1.71963600 | -0.62778200 |
| Rh | 2.97014200  | -2.30589900 | 0.65403000  |
| O  | 1.35734400  | -3.48773000 | 0.15484600  |
| O  | 3.31164800  | 0.76497300  | 0.30803600  |
| O  | 2.51756200  | -0.77048000 | -2.04270900 |
| O  | 2.15161400  | -1.97547100 | 2.50593000  |
| C  | 0.76002000  | -0.74355200 | 4.00564800  |
| H  | -0.32569900 | -0.64177200 | 3.93213800  |
| H  | 1.02616700  | -1.53958700 | 4.70104900  |
| H  | 1.15403400  | 0.21181900  | 4.36652900  |
| C  | -0.82577800 | -3.86900200 | -0.71912100 |
| H  | -1.74638000 | -3.48897600 | -0.26905500 |
| H  | -0.96759200 | -3.86026000 | -1.80423300 |
| H  | -0.63057100 | -4.88667600 | -0.38137300 |
| C  | 3.88183000  | -1.96639200 | -3.56559900 |
| H  | 3.05216200  | -2.17396900 | -4.24782200 |
| H  | 4.37068300  | -1.05186800 | -3.91330000 |
| H  | 4.58820200  | -2.79625200 | -3.57426600 |
| C  | 5.43652300  | 1.17647300  | 1.26352100  |
| H  | 5.56827900  | 1.94687600  | 0.50078100  |
| H  | 5.14229300  | 1.67472500  | 2.19323100  |
| H  | 6.36616600  | 0.63167300  | 1.43039800  |
| Br | 1.13527900  | 3.09942600  | 1.65323500  |
| O  | -5.60548300 | 1.08613100  | 2.04315200  |

|   |             |             |             |
|---|-------------|-------------|-------------|
| N | -4.00509600 | -0.99459800 | -0.25506400 |
| C | -2.73777900 | 1.63552900  | 1.90418100  |
| H | -3.53760300 | 1.70435700  | 2.62758600  |
| O | -6.07483700 | -0.33882200 | -1.89241000 |
| N | -3.85538400 | -1.93088100 | -0.88180800 |
| C | -1.54180600 | 2.31525600  | 2.10295800  |
| H | -1.40350400 | 2.90953100  | 2.99913000  |
| O | -8.15398900 | -0.96323800 | -1.22697500 |
| N | -7.71092000 | -0.30938000 | 1.21486500  |
| C | -0.49811200 | 2.22581200  | 1.18471800  |
| N | -8.58039800 | -0.36431600 | 1.93383200  |
| C | -0.63640700 | 1.47116400  | 0.00141500  |
| C | -1.85371000 | 0.80407600  | -0.18346400 |
| H | -1.98199300 | 0.20929900  | -1.07948200 |
| C | -2.89789300 | 0.85535600  | 0.74858900  |
| C | -4.13499600 | 0.08367100  | 0.49186400  |
| C | -5.45927900 | 0.37302800  | 1.05231600  |
| C | -6.65985200 | -0.24387600 | 0.41146600  |
| C | -6.89699200 | -0.51163000 | -1.01437700 |
| C | -8.48706000 | -1.21176000 | -2.60610400 |
| H | -7.82491100 | -1.97191100 | -3.02799800 |
| H | -8.39486100 | -0.29491800 | -3.19373300 |
| H | -9.51896300 | -1.56131600 | -2.59663100 |
| C | 0.53110100  | 1.27743300  | -0.91250700 |
| C | 1.13520500  | 2.49243100  | -1.55081100 |
| C | 2.44458700  | 2.44754400  | -2.05694600 |
| C | 0.39232500  | 3.68058300  | -1.67944300 |
| C | 3.00491300  | 3.57751400  | -2.64919200 |
| H | 3.01420200  | 1.53261000  | -1.97406400 |
| C | 0.95551400  | 4.80691800  | -2.27020900 |
| H | -0.62276100 | 3.71853000  | -1.29712100 |
| C | 2.26657400  | 4.75823600  | -2.75357100 |
| H | 4.02164600  | 3.53649300  | -3.02896600 |
| H | 0.37542400  | 5.72101000  | -2.35466100 |
| H | 2.70852700  | 5.63773300  | -3.21336400 |
| N | -0.09003600 | 0.51400400  | -2.30276700 |
| N | 0.01380100  | -0.08985800 | -3.23332300 |

1-TS2

O 1

|    |             |             |             |
|----|-------------|-------------|-------------|
| Rh | -0.68553200 | -0.75193600 | 0.08936600  |
| C  | 0.31190000  | -2.43503900 | -2.04781400 |
| O  | 0.70451200  | -1.61367900 | -1.15092800 |
| C  | -1.53966800 | 0.77354500  | -2.26708200 |

|    |             |             |             |
|----|-------------|-------------|-------------|
| O  | -2.28097900 | -0.20313000 | -2.57914000 |
| C  | -3.44540500 | -0.17893300 | 0.85731900  |
| O  | -3.81863500 | -0.82390600 | -0.17047100 |
| C  | -1.60422900 | -3.34716000 | 1.01082700  |
| O  | -0.71217700 | -2.45887500 | 1.23163200  |
| Rh | -2.39813300 | -1.79414900 | -1.28360800 |
| O  | -2.44641900 | -3.33425600 | 0.06160400  |
| O  | -0.83482400 | 0.86695800  | -1.20075100 |
| O  | -2.23463000 | 0.00359800  | 1.22573000  |
| O  | -0.89250200 | -2.72400900 | -2.32206400 |
| C  | 1.40018500  | -3.13534100 | -2.82231700 |
| H  | 1.86874200  | -3.87066600 | -2.16146100 |
| H  | 0.98908300  | -3.63667200 | -3.69836000 |
| H  | 2.16548000  | -2.41146800 | -3.11154300 |
| C  | -1.64824600 | -4.50137300 | 1.98041400  |
| H  | -0.66255700 | -4.96978500 | 2.03666700  |
| H  | -1.88294200 | -4.11726800 | 2.97749600  |
| H  | -2.39785100 | -5.23037200 | 1.67332200  |
| C  | -4.50529600 | 0.44690000  | 1.72769500  |
| H  | -4.31594200 | 0.18648300  | 2.77197500  |
| H  | -4.43922400 | 1.53440200  | 1.63590100  |
| H  | -5.49610900 | 0.11115300  | 1.42184800  |
| C  | -1.48373400 | 1.95527700  | -3.20440100 |
| H  | -0.44089600 | 2.19611800  | -3.42786000 |
| H  | -2.02766100 | 1.74017700  | -4.12398100 |
| H  | -1.92453500 | 2.82624700  | -2.70960400 |
| Br | 5.70178700  | 3.54101400  | -0.94579100 |
| O  | 1.15374900  | -1.31379300 | 3.33775100  |
| C  | 3.35140200  | 1.19895500  | 1.56583000  |
| H  | 3.42837200  | 0.79149400  | 2.57022900  |
| O  | 3.67026700  | -1.23857800 | -0.23065800 |
| C  | 4.38963100  | 1.97214000  | 1.06068400  |
| H  | 5.27645100  | 2.16734300  | 1.65244000  |
| O  | 3.46722500  | -3.48686500 | -0.04707700 |
| N  | 2.08995400  | -3.36535500 | 2.06008500  |
| C  | 4.27649800  | 2.48801900  | -0.23164300 |
| N  | 1.88493300  | -4.34792400 | 2.57881600  |
| C  | 3.14281400  | 2.25355900  | -1.00596700 |
| H  | 3.07329000  | 2.66591900  | -2.00605000 |
| C  | 2.10426400  | 1.48334400  | -0.48471200 |
| H  | 1.22251600  | 1.29415100  | -1.08082600 |
| C  | 2.20195700  | 0.93762000  | 0.79868400  |
| C  | 1.13217000  | 0.11447500  | 1.41689400  |
| C  | 1.53687800  | -1.11058600 | 2.19645000  |

|   |             |             |             |
|---|-------------|-------------|-------------|
| C | 2.29330500  | -2.18943300 | 1.48880200  |
| C | 3.18679400  | -2.20213900 | 0.31943100  |
| C | 4.51422300  | -3.61622600 | -1.02437600 |
| H | 5.44854300  | -3.19658400 | -0.64142000 |
| H | 4.24898300  | -3.09885500 | -1.94837800 |
| H | 4.61902700  | -4.68703700 | -1.19929700 |
| C | -1.83994100 | 3.57191700  | 1.84041000  |
| C | -0.75401900 | 2.88377100  | 1.46022300  |
| H | -1.91392200 | 3.90314800  | 2.87710400  |
| H | -0.63475500 | 2.56433000  | 0.42817000  |
| C | 0.32508200  | 2.46632600  | 2.40539800  |
| H | 1.31293800  | 2.80997000  | 2.08503000  |
| H | 0.13880500  | 2.82995400  | 3.41972300  |
| O | 0.36489600  | 1.01536800  | 2.57741600  |
| H | -0.12816000 | 0.44452600  | 1.60591800  |
| C | -2.97359800 | 3.92639400  | 0.97388500  |
| C | -3.82673600 | 4.98605800  | 1.32317200  |
| C | -3.25948000 | 3.19639900  | -0.19588900 |
| C | -4.91197500 | 5.32675500  | 0.51506700  |
| H | -3.63122100 | 5.55031700  | 2.23170900  |
| C | -4.34519900 | 3.53298500  | -1.00000400 |
| H | -2.64125700 | 2.34225400  | -0.44228500 |
| C | -5.17382400 | 4.60453000  | -0.65076100 |
| H | -5.55641400 | 6.15385600  | 0.79891700  |
| H | -4.55554400 | 2.94683500  | -1.89044000 |
| H | -6.02345200 | 4.86420000  | -1.27531800 |

1-TS3

O 1

|    |             |             |             |
|----|-------------|-------------|-------------|
| Rh | 1.68762900  | 2.85486700  | 0.10271000  |
| C  | 2.11348600  | 1.14869400  | -2.19111600 |
| O  | 2.61118300  | 2.14543600  | -1.58569000 |
| C  | -0.61943500 | 3.49801000  | -1.48580400 |
| O  | -1.03437700 | 2.31413900  | -1.23663300 |
| C  | -0.34290500 | 2.75683000  | 2.16906800  |
| O  | -0.80788100 | 1.70894700  | 1.60193000  |
| C  | 2.41933100  | 0.49046000  | 1.56321500  |
| O  | 2.83766100  | 1.65870700  | 1.29012000  |
| Rh | 0.09825000  | 1.01160100  | -0.11090300 |
| O  | 1.37413900  | -0.06375300 | 1.08340300  |
| O  | 0.46612900  | 4.00509100  | -1.07640000 |
| O  | 0.64469200  | 3.44720000  | 1.77775200  |
| O  | 1.08916000  | 0.47686000  | -1.82918800 |
| C  | 2.81026100  | 0.69298100  | -3.45115400 |



|    |             |             |             |
|----|-------------|-------------|-------------|
| H  | 3.64336500  | 0.04078900  | -3.17145300 |
| H  | 2.12329900  | 0.13590200  | -4.08959200 |
| H  | 3.21908700  | 1.55424200  | -3.98207700 |
| C  | 3.23240900  | -0.31023900 | 2.54936400  |
| H  | 3.51592600  | 0.33475400  | 3.38433900  |
| H  | 2.66548900  | -1.17185300 | 2.89912700  |
| H  | 4.14979700  | -0.65640800 | 2.06541500  |
| C  | -1.03752500 | 3.18088500  | 3.44201300  |
| H  | -0.71735000 | 2.51861900  | 4.25341900  |
| H  | -0.77380500 | 4.20758700  | 3.69673900  |
| H  | -2.11892600 | 3.07595500  | 3.32957100  |
| C  | -1.52270500 | 4.34480500  | -2.34927500 |
| H  | -2.51297100 | 4.40345800  | -1.88907000 |
| H  | -1.10548800 | 5.34381700  | -2.47454300 |
| H  | -1.64183800 | 3.86307500  | -3.32410900 |
| Br | 5.62699100  | -2.68914600 | 0.54336200  |
| O  | -1.55469600 | -1.24546100 | -2.49065700 |
| C  | 2.10459500  | -2.33247200 | -1.65551800 |
| H  | 1.82560600  | -1.99734100 | -2.64879500 |
| O  | -0.95871600 | -1.83278500 | 1.73008300  |
| C  | 3.44295400  | -2.29321300 | -1.27176800 |
| H  | 4.20891100  | -1.94351700 | -1.95421000 |
| O  | -2.80788000 | -0.53002000 | 1.56392700  |
| N  | -2.81474100 | 0.24876500  | -0.84124100 |
| C  | 3.78954000  | -2.73600100 | 0.00333500  |
| N  | -3.43598700 | 1.10440600  | -1.16687400 |
| C  | 2.82656900  | -3.21253500 | 0.88916800  |
| H  | 3.11636300  | -3.56029700 | 1.87396700  |
| C  | 1.48835000  | -3.22641700 | 0.49913600  |
| H  | 0.72524000  | -3.57077800 | 1.18300400  |
| C  | 1.11929000  | -2.78827200 | -0.77408400 |
| C  | -0.31253800 | -2.87209200 | -1.25595000 |
| C  | -1.08908900 | -1.51949300 | -1.39601400 |
| C  | -1.26334600 | -0.59147000 | -0.24058600 |
| C  | -1.67108100 | -1.07381900 | 1.10775300  |
| C  | -3.10154400 | -0.77855000 | 2.94930000  |
| H  | -2.37983300 | -0.25026900 | 3.57729400  |
| H  | -3.06061800 | -1.84842800 | 3.16746600  |
| H  | -4.10862600 | -0.39323600 | 3.10139700  |
| C  | -4.29988500 | -2.64135500 | -0.93931000 |
| C  | -3.40321100 | -3.38799400 | -0.27729800 |
| H  | -4.21313700 | -2.58538800 | -2.02443900 |
| H  | -3.40807500 | -3.44026600 | 0.80925500  |
| C  | -2.31492700 | -4.18138300 | -0.93854800 |

|   |             |             |             |
|---|-------------|-------------|-------------|
| H | -2.40921300 | -5.24391400 | -0.68329900 |
| H | -2.36769700 | -4.08912000 | -2.03201100 |
| O | -1.01917200 | -3.79579600 | -0.45425100 |
| H | -0.30505100 | -3.21163500 | -2.30332600 |
| C | -5.38227200 | -1.83798300 | -0.35481300 |
| C | -6.07147600 | -0.92697900 | -1.17344000 |
| C | -5.75104300 | -1.92077300 | 1.00089500  |
| C | -7.07386600 | -0.10745500 | -0.65556800 |
| H | -5.80544200 | -0.85390400 | -2.22500100 |
| C | -6.75265700 | -1.10535700 | 1.51887500  |
| H | -5.25656100 | -2.63486300 | 1.65160000  |
| C | -7.41626600 | -0.19015900 | 0.69478800  |
| H | -7.58666200 | 0.59421400  | -1.30687800 |
| H | -7.02558100 | -1.18877700 | 2.56733400  |
| H | -8.19834100 | 0.44402800  | 1.10148300  |

1-TS4

O 1

|    |             |             |             |
|----|-------------|-------------|-------------|
| Rh | 2.86331000  | -2.11084200 | -0.73420400 |
| C  | 0.33464100  | -2.27675900 | -2.08909600 |
| O  | 1.49623300  | -2.78967300 | -2.09859200 |
| C  | 2.80497000  | 0.44220000  | -2.10754900 |
| O  | 1.85743200  | 0.79810100  | -1.32809000 |
| C  | 3.71647700  | -0.46085000 | 1.50013400  |
| O  | 2.56689200  | 0.10481400  | 1.47466100  |
| C  | 1.23048100  | -3.12513300 | 1.41651200  |
| O  | 2.17143300  | -3.47205200 | 0.64204400  |
| Rh | 1.16919400  | -0.52507800 | 0.07827900  |
| O  | 0.64072800  | -1.99296000 | 1.43433800  |
| O  | 3.43119600  | -0.65971800 | -2.07668800 |
| O  | 4.13137900  | -1.35260600 | 0.70693700  |
| O  | -0.07847000 | -1.35327600 | -1.31309800 |
| C  | -0.67577600 | -2.78897800 | -3.08700600 |
| H  | -1.56014200 | -3.14594300 | -2.55221000 |
| H  | -0.99313600 | -1.96210700 | -3.72862400 |
| H  | -0.24756200 | -3.59071700 | -3.68869000 |
| C  | 0.74620800  | -4.13044100 | 2.43597900  |
| H  | 1.25291600  | -5.08626500 | 2.30307400  |
| H  | 0.94238900  | -3.74549700 | 3.44159700  |
| H  | -0.33519000 | -4.25485700 | 2.33408200  |
| C  | 4.65076300  | -0.00458300 | 2.59899800  |
| H  | 5.62451400  | -0.48301300 | 2.49563100  |
| H  | 4.76322900  | 1.08337000  | 2.57027000  |
| H  | 4.21383900  | -0.26034200 | 3.56901500  |

|    |             |             |             |
|----|-------------|-------------|-------------|
| C  | 3.23847300  | 1.45276300  | -3.14292700 |
| H  | 4.08527000  | 2.01996300  | -2.74537700 |
| H  | 3.56199200  | 0.93771500  | -4.04893000 |
| H  | 2.42729800  | 2.14878300  | -3.35874100 |
| Br | -7.95207500 | -0.58757400 | -0.77140500 |
| O  | -1.20797500 | 1.29162800  | -1.50283000 |
| C  | -4.30573000 | 1.38851900  | -1.21608800 |
| H  | -3.71175600 | 1.78194900  | -2.03453000 |
| O  | -1.98133700 | -0.67155100 | 1.68635900  |
| C  | -5.52726200 | 0.77237800  | -1.48136600 |
| H  | -5.90007700 | 0.69914400  | -2.49648400 |
| O  | -0.43186800 | 0.27205800  | 3.04511000  |
| C  | -6.26679500 | 0.25081000  | -0.42079700 |
| C  | -5.80045100 | 0.32961400  | 0.88959600  |
| H  | -6.38370500 | -0.08889000 | 1.70167600  |
| C  | -4.57366400 | 0.94264200  | 1.14213300  |
| H  | -4.19119300 | 0.99183400  | 2.15333700  |
| C  | -3.82247600 | 1.47956200  | 0.09427100  |
| C  | -2.48277800 | 2.14504000  | 0.34221200  |
| C  | -1.32726800 | 1.32127100  | -0.29758800 |
| C  | -0.35494700 | 0.69668000  | 0.68254100  |
| C  | -1.03338600 | 0.07266700  | 1.85695200  |
| C  | -0.93258000 | -0.55140200 | 4.11198500  |
| H  | -0.78120600 | -1.60432600 | 3.86479200  |
| H  | -1.99772700 | -0.36676800 | 4.27569200  |
| H  | -0.35467500 | -0.27320700 | 4.99345900  |
| C  | 0.72230400  | 3.31437300  | 0.37266000  |
| C  | 0.21706800  | 2.54046400  | 1.42080500  |
| H  | -0.01675400 | 3.88575500  | -0.19096200 |
| H  | 0.92039600  | 2.07171100  | 2.10266900  |
| C  | -1.10163800 | 3.05439800  | 2.04354500  |
| H  | -1.00983200 | 3.00671200  | 3.12996300  |
| H  | -1.25285500 | 4.10533200  | 1.75361800  |
| O  | -2.27677100 | 2.31825900  | 1.73363600  |
| H  | -2.46857600 | 3.12281200  | -0.16955200 |
| C  | 2.07034700  | 3.52109600  | -0.06122800 |
| C  | 2.29770600  | 4.40693800  | -1.14192500 |
| C  | 3.18437000  | 2.93891500  | 0.58589400  |
| C  | 3.58880400  | 4.70234700  | -1.55844300 |
| H  | 1.44699900  | 4.85698100  | -1.64635700 |
| C  | 4.47164900  | 3.22852400  | 0.15828500  |
| H  | 3.01705400  | 2.23770000  | 1.39129200  |
| C  | 4.67955200  | 4.11303700  | -0.90932500 |
| H  | 3.75086900  | 5.38413300  | -2.38729700 |

|   |            |            |             |
|---|------------|------------|-------------|
| H | 5.32169400 | 2.76796300 | 0.65242000  |
| H | 5.69051200 | 4.34079300 | -1.23428700 |

2a

0 1

|   |             |             |             |
|---|-------------|-------------|-------------|
| C | 0.82771700  | -0.61610700 | 0.18333900  |
| C | 1.88019900  | 0.21214700  | 0.22008300  |
| H | 1.02308400  | -1.68829200 | 0.22507000  |
| H | 1.75493300  | 1.29079800  | 0.15114600  |
| C | 3.29842300  | -0.24265000 | 0.36965100  |
| H | 3.66946600  | 0.05645000  | 1.36652000  |
| H | 3.35086300  | -1.34274900 | 0.32256000  |
| O | 4.07763500  | 0.37074500  | -0.65809800 |
| H | 5.00867800  | 0.21110800  | -0.45693200 |
| C | -0.59346200 | -0.25255900 | 0.08513700  |
| C | -1.54729000 | -1.27420100 | -0.06552500 |
| C | -1.05386100 | 1.07671400  | 0.13499900  |
| C | -2.90671400 | -0.98463400 | -0.17235500 |
| H | -1.21318800 | -2.30815600 | -0.10290900 |
| C | -2.41023500 | 1.36720100  | 0.02686400  |
| H | -0.34600300 | 1.88911500  | 0.26557000  |
| C | -3.34491200 | 0.33890200  | -0.12800600 |
| H | -3.62264500 | -1.79304000 | -0.28980400 |
| H | -2.74246300 | 2.40065300  | 0.06789000  |
| H | -4.40300100 | 0.56927300  | -0.20944900 |

2-int2

0 1

|    |             |             |             |
|----|-------------|-------------|-------------|
| Rh | -0.72898500 | -0.12532700 | -0.07623000 |
| C  | 0.21212700  | -1.81703200 | 2.08484700  |
| O  | 0.46169200  | -0.71336000 | 1.49334500  |
| C  | 0.18079300  | -2.43191100 | -1.56161600 |
| O  | -0.74593300 | -3.10508800 | -1.01283000 |
| C  | -2.99189700 | -0.48738500 | -1.87582300 |
| O  | -3.21588300 | -1.59509800 | -1.30075000 |
| C  | -2.97955800 | 0.16022500  | 1.75802200  |
| O  | -2.00926400 | 0.83101900  | 1.25538900  |
| Rh | -2.02710500 | -2.15911500 | 0.28281200  |
| O  | -3.23139000 | -1.06071900 | 1.55355100  |
| O  | 0.42335200  | -1.19149700 | -1.38022900 |
| O  | -2.06922200 | 0.34544200  | -1.57984500 |
| O  | -0.74889900 | -2.60625300 | 1.83110800  |
| C  | 1.18157700  | -2.23113900 | 3.16713800  |
| H  | 0.68051500  | -2.85898400 | 3.90542700  |

|    |             |             |             |
|----|-------------|-------------|-------------|
| H  | 1.98591900  | -2.81400000 | 2.70576400  |
| H  | 1.62615900  | -1.35261800 | 3.63749000  |
| C  | -3.88499300 | 0.90663200  | 2.71401200  |
| H  | -3.98132600 | 1.95151800  | 2.41071100  |
| H  | -4.86444500 | 0.42926900  | 2.75713700  |
| H  | -3.44399700 | 0.87751100  | 3.71668300  |
| C  | -3.87679000 | -0.10730400 | -3.04042600 |
| H  | -4.16272300 | 0.94468600  | -2.96398500 |
| H  | -3.30609600 | -0.22672600 | -3.96698800 |
| H  | -4.76151900 | -0.74322400 | -3.07534400 |
| C  | 1.08410900  | -3.14320100 | -2.54042500 |
| H  | 2.12325100  | -2.86800700 | -2.34533500 |
| H  | 0.95034000  | -4.22283900 | -2.47038600 |
| H  | 0.83701400  | -2.81175300 | -3.55414400 |
| Br | 6.47301200  | -0.18575800 | 0.01620200  |
| O  | 0.15292800  | 2.10059800  | -2.67201300 |
| C  | 2.67795700  | 0.85196800  | -1.38121400 |
| H  | 2.15145400  | 0.83382500  | -2.32673100 |
| O  | 0.17602000  | 2.51774900  | 0.84953900  |
| C  | 3.99790100  | 0.41517300  | -1.31036400 |
| H  | 4.50755500  | 0.06957900  | -2.20272100 |
| O  | -1.53024600 | 3.90223800  | 1.40673400  |
| N  | -2.13169500 | 3.65480100  | -1.49236400 |
| C  | 4.66061800  | 0.42361200  | -0.08365400 |
| N  | -2.98656800 | 3.97303500  | -2.16078400 |
| C  | 4.02109600  | 0.86701100  | 1.07249100  |
| H  | 4.54580000  | 0.86598800  | 2.02128700  |
| C  | 2.70000500  | 1.30006900  | 0.99684800  |
| H  | 2.19092700  | 1.61484600  | 1.89981100  |
| C  | 2.01303800  | 1.30287400  | -0.22739000 |
| C  | 0.59289900  | 1.67896300  | -0.30294600 |
| C  | -0.02681300 | 2.28951300  | -1.48549800 |
| C  | -1.07396300 | 3.20726800  | -0.86670700 |
| C  | -0.84377500 | 3.24181000  | 0.51845700  |
| C  | -1.23576700 | 3.60383800  | 2.80386200  |
| H  | -0.22350900 | 3.93441500  | 3.04510600  |
| H  | -1.34135400 | 2.52876300  | 2.95589900  |
| H  | -1.97411500 | 4.16812400  | 3.36942300  |

2-int3

0 1

|    |             |             |             |
|----|-------------|-------------|-------------|
| Br | -6.47306900 | -0.18578100 | 0.01617700  |
| O  | -0.15296200 | 2.10050500  | -2.67203400 |
| C  | -2.67801500 | 0.85198500  | -1.38123600 |

|    |             |             |             |
|----|-------------|-------------|-------------|
| H  | -2.15151800 | 0.83371500  | -2.32674900 |
| O  | -0.17607300 | 2.51769900  | 0.84953000  |
| C  | -3.99793200 | 0.41508800  | -1.31034700 |
| H  | -4.50757500 | 0.06945400  | -2.20269600 |
| O  | 1.53016700  | 3.90222400  | 1.40668500  |
| N  | 2.13168500  | 3.65469600  | -1.49236500 |
| C  | -4.66067400 | 0.42355200  | -0.08365100 |
| N  | 2.98655800  | 3.97294700  | -2.16077800 |
| C  | -4.02116800 | 0.86703800  | 1.07247200  |
| H  | -4.54587700 | 0.86604500  | 2.02126600  |
| C  | -2.70008800 | 1.30013900  | 0.99682900  |
| H  | -2.19103300 | 1.61489300  | 1.89981000  |
| C  | -2.01310900 | 1.30290200  | -0.22740600 |
| C  | -0.59290300 | 1.67879600  | -0.30294900 |
| C  | 0.02678600  | 2.28941200  | -1.48552300 |
| C  | 1.07393700  | 3.20717000  | -0.86673600 |
| C  | 0.84373300  | 3.24173600  | 0.51843000  |
| C  | 1.23563100  | 3.60391900  | 2.80382500  |
| H  | 1.34140900  | 2.52887900  | 2.95598300  |
| H  | 0.22329300  | 3.93433200  | 3.04495100  |
| H  | 1.97382900  | 4.16840400  | 3.36938200  |
| Rh | 0.72902600  | -0.12528900 | -0.07626900 |
| C  | -0.18077900 | -2.43199100 | -1.56146800 |
| O  | -0.42310900 | -1.19148800 | -1.38037100 |
| C  | -0.21206700 | -1.81695300 | 2.08488700  |
| O  | 0.74905900  | -2.60610000 | 1.83131200  |
| C  | 2.97964200  | 0.16038700  | 1.75788600  |
| O  | 3.23152800  | -1.06054600 | 1.55340400  |
| C  | 2.99193000  | -0.48736700 | -1.87582700 |
| O  | 2.06940600  | 0.34559000  | -1.57972700 |
| Rh | 2.02714800  | -2.15908400 | 0.28288200  |
| O  | 3.21578000  | -1.59514500 | -1.30082800 |
| O  | -0.46174200 | -0.71339500 | 1.49321500  |
| O  | 2.00919600  | 0.83108900  | 1.25543000  |
| O  | 0.74582500  | -3.10519600 | -1.01252500 |
| C  | -1.08430400 | -3.14336600 | -2.54004300 |
| H  | -2.12339900 | -2.86819600 | -2.34464300 |
| H  | -0.83750400 | -2.81200600 | -3.55385800 |
| H  | -0.95050300 | -4.22299500 | -2.46992500 |
| C  | 3.87665800  | -0.10754500 | -3.04063800 |
| H  | 4.16162400  | 0.94476800  | -2.96525000 |
| H  | 4.76188600  | -0.74280400 | -3.07492700 |
| H  | 3.30615800  | -0.22843600 | -3.96714400 |
| C  | 3.88523100  | 0.90681100  | 2.71372000  |

|   |             |             |            |
|---|-------------|-------------|------------|
| H | 4.86527600  | 0.43050700  | 2.75523000 |
| H | 3.98002900  | 1.95215100  | 2.41154300 |
| H | 3.44543600  | 0.87590400  | 3.71686800 |
| C | -1.18149600 | -2.23100100 | 3.16722200 |
| H | -1.62631600 | -1.35246100 | 3.63731100 |
| H | -1.98566200 | -2.81419000 | 2.70595900 |
| H | -0.68032600 | -2.85852900 | 3.90571000 |

2-TS2

O 1

|    |             |             |             |
|----|-------------|-------------|-------------|
| Rh | -0.74385400 | -0.19434800 | -0.11652600 |
| C  | -0.94628800 | -1.41480400 | 2.53428800  |
| O  | -0.27786700 | -0.54859100 | 1.87203000  |
| C  | 0.02910700  | -2.92636200 | -0.71095700 |
| O  | -1.15121600 | -3.28607300 | -0.41734700 |
| C  | -2.35089900 | -0.69777300 | -2.48564700 |
| O  | -3.00986600 | -1.55105900 | -1.81814400 |
| C  | -3.32792900 | 0.86062400  | 0.74660900  |
| O  | -2.12783700 | 1.22268600  | 0.48189000  |
| Rh | -2.52292700 | -1.86717500 | 0.15190100  |
| O  | -3.77881700 | -0.31829300 | 0.70885800  |
| O  | 0.49028600  | -1.73495200 | -0.67725900 |
| O  | -1.38946200 | 0.02362200  | -2.05251000 |
| O  | -1.92806900 | -2.09173700 | 2.11007700  |
| C  | -0.48801400 | -1.66472300 | 3.95352500  |
| H  | -1.29793400 | -2.09460300 | 4.54400000  |
| H  | 0.34399600  | -2.37694800 | 3.93199100  |
| H  | -0.12674000 | -0.73843900 | 4.40476000  |
| C  | -4.29296300 | 1.96657700  | 1.11195700  |
| H  | -3.75389400 | 2.86479300  | 1.41790000  |
| H  | -4.90271600 | 2.20359700  | 0.23372800  |
| H  | -4.96556400 | 1.62927600  | 1.90296900  |
| C  | -2.70178400 | -0.52353300 | -3.94440500 |
| H  | -2.59899800 | 0.52424600  | -4.23296100 |
| H  | -1.99393400 | -1.10537200 | -4.54412900 |
| H  | -3.71170000 | -0.88624100 | -4.13884100 |
| C  | 0.99330500  | -3.99372500 | -1.17290600 |
| H  | 1.99432900  | -3.78436300 | -0.79037800 |
| H  | 0.65201500  | -4.97898900 | -0.85363300 |
| H  | 1.04145800  | -3.97214000 | -2.26673700 |
| Br | 6.70778900  | -0.49469300 | 0.10112200  |
| O  | 0.54250800  | 2.19379000  | -2.54342600 |
| C  | 3.17611400  | 1.31532000  | -1.16200100 |
| H  | 2.87731500  | 1.97514900  | -1.96788800 |

|   |             |             |             |
|---|-------------|-------------|-------------|
| O | 0.49095500  | 2.28670100  | 1.20129200  |
| C | 4.50428900  | 0.90930500  | -1.07160700 |
| H | 5.23908300  | 1.26257300  | -1.78590400 |
| O | -1.00461400 | 3.94670400  | 1.59470500  |
| N | -1.19657800 | 4.13818500  | -1.23720400 |
| C | 4.88318900  | 0.04885600  | -0.04121200 |
| N | -1.86629900 | 4.80951400  | -1.85554000 |
| C | 3.95332300  | -0.42489600 | 0.88690300  |
| H | 4.26865400  | -1.09330300 | 1.67999100  |
| C | 2.62241600  | -0.04448300 | 0.76865700  |
| H | 1.88352700  | -0.41320100 | 1.46895000  |
| C | 2.21279400  | 0.83921900  | -0.25030600 |
| C | 0.80245700  | 1.21362200  | -0.35988800 |
| C | 0.37684400  | 2.25500900  | -1.33721000 |
| C | -0.37938900 | 3.32102600  | -0.62263300 |
| C | -0.29078000 | 3.17545300  | 0.79727800  |
| C | -0.97479600 | 3.58171500  | 2.99991300  |
| H | 0.03419000  | 3.70443100  | 3.39870100  |
| H | -1.29398200 | 2.54307900  | 3.10763700  |
| H | -1.67045200 | 4.26437200  | 3.48444200  |

## 2-TS3

O 1

|    |            |             |             |
|----|------------|-------------|-------------|
| Rh | 2.69224400 | -0.43127100 | -0.14899100 |
| C  | 3.76669400 | -0.01250800 | 2.52198100  |
| O  | 2.65919700 | -0.06783400 | 1.89220800  |
| C  | 4.16365000 | 2.03374000  | -0.53912800 |
| O  | 5.23931300 | 1.37725600  | -0.34132300 |
| C  | 4.03154900 | -1.02363400 | -2.63242900 |
| O  | 5.13067100 | -1.01114800 | -1.98799000 |
| C  | 3.63648600 | -3.10550400 | 0.45596700  |
| O  | 2.55652900 | -2.44522700 | 0.27542900  |
| Rh | 5.08542000 | -0.62916200 | 0.02471600  |
| O  | 4.81291500 | -2.63493500 | 0.40971100  |
| O  | 2.98703900 | 1.54954200  | -0.53469400 |
| O  | 2.87215500 | -0.83839200 | -2.13786900 |
| O  | 4.91958300 | -0.21950400 | 2.02956000  |
| C  | 3.70232100 | 0.36840300  | 3.98254800  |
| H  | 4.54415200 | -0.06197900 | 4.52673900  |
| H  | 3.76488600 | 1.45936900  | 4.05752100  |
| H  | 2.75346700 | 0.05191600  | 4.41962800  |
| C  | 3.48770500 | -4.58580300 | 0.71701600  |
| H  | 2.53288200 | -4.79108100 | 1.20497700  |
| H  | 3.50555000 | -5.11398800 | -0.24239400 |



|    |             |             |             |
|----|-------------|-------------|-------------|
| H  | 4.31923400  | -4.94919500 | 1.32247800  |
| C  | 4.10661400  | -1.24774400 | -4.12232200 |
| H  | 3.16464300  | -1.65614600 | -4.49037200 |
| H  | 4.27993100  | -0.28235500 | -4.60972400 |
| H  | 4.94296500  | -1.90622100 | -4.36305600 |
| C  | 4.28254000  | 3.50913200  | -0.82924400 |
| H  | 3.38626900  | 4.03191900  | -0.49027000 |
| H  | 5.17807300  | 3.91687500  | -0.35794200 |
| H  | 4.36950100  | 3.64591400  | -1.91252600 |
| Br | 0.67248200  | 5.87570100  | 0.10513500  |
| O  | -0.24583900 | -0.95139400 | -2.41266600 |
| C  | 0.01326100  | 1.96464900  | -1.19901100 |
| H  | -0.16484500 | 1.45853600  | -2.13962000 |
| O  | 0.01244700  | -0.99189600 | 1.13464500  |
| C  | 0.16174400  | 3.34627300  | -1.15971200 |
| H  | 0.10279700  | 3.92749200  | -2.07310200 |
| O  | -0.13076400 | -3.13390200 | 1.85169300  |
| N  | -0.59020100 | -3.62067500 | -1.06179300 |
| C  | 0.40277700  | 3.97726000  | 0.06012200  |
| N  | -0.83437600 | -4.53383900 | -1.68328800 |
| C  | 0.47308900  | 3.24733700  | 1.24611000  |
| H  | 0.65708700  | 3.75173200  | 2.18839000  |
| C  | 0.31881500  | 1.86611700  | 1.20606800  |
| H  | 0.39516100  | 1.28908400  | 2.11847700  |
| C  | 0.10579500  | 1.20848800  | -0.01586000 |
| C  | 0.00877700  | -0.23960300 | -0.09622000 |
| C  | -0.19665100 | -1.13912900 | -1.20490500 |
| C  | -0.31945100 | -2.48456300 | -0.48449000 |
| C  | -0.15197100 | -2.25879500 | 0.88705700  |
| C  | 0.05600900  | -2.59057800 | 3.19013800  |
| H  | -0.79795400 | -1.95494300 | 3.43233200  |
| H  | 0.98412300  | -2.01539000 | 3.22004200  |
| H  | 0.10236100  | -3.46066600 | 3.84157700  |
| Rh | -2.77875900 | -0.28174300 | -0.12968600 |
| C  | -3.66642500 | 1.83008300  | 1.63927300  |
| O  | -2.61539400 | 1.28457900  | 1.17052000  |
| C  | -3.90662600 | -1.87836000 | 2.01790200  |
| O  | -5.04104000 | -1.42868800 | 1.67394900  |
| C  | -4.30994100 | -2.20863700 | -1.66946600 |
| O  | -5.35990300 | -1.65642900 | -1.21010900 |
| C  | -4.04328800 | 1.48611500  | -2.02304100 |
| O  | -2.90902500 | 1.00191100  | -1.70405500 |
| Rh | -5.16428400 | -0.09592600 | 0.10624700  |
| O  | -5.15515800 | 1.21744300  | -1.46073800 |

|   |             |             |             |
|---|-------------|-------------|-------------|
| O | -2.78614400 | -1.58589200 | 1.47583000  |
| O | -3.10967500 | -1.88614700 | -1.38419600 |
| O | -4.86335300 | 1.47145800  | 1.39458800  |
| C | -3.46113400 | 2.98607500  | 2.58685800  |
| H | -2.50201300 | 3.46510300  | 2.38429100  |
| H | -4.28228900 | 3.69861400  | 2.49334300  |
| H | -3.45507100 | 2.60513700  | 3.61387700  |
| C | -4.05254500 | 2.48565400  | -3.15192700 |
| H | -3.38109500 | 2.15046400  | -3.94516800 |
| H | -5.06442600 | 2.62630000  | -3.53263300 |
| H | -3.67352500 | 3.44081800  | -2.77369900 |
| C | -4.48927300 | -3.32874300 | -2.66487900 |
| H | -3.71853200 | -4.08844300 | -2.51873400 |
| H | -5.48519000 | -3.76409300 | -2.57775900 |
| H | -4.36728100 | -2.91873100 | -3.67294800 |
| C | -3.86270400 | -2.82210900 | 3.19712700  |
| H | -3.03614600 | -3.52685600 | 3.08688900  |
| H | -3.70214100 | -2.23789500 | 4.10995300  |
| H | -4.81066600 | -3.35275600 | 3.29325400  |

## 2-TS4

O 1

|    |             |             |             |
|----|-------------|-------------|-------------|
| Rh | -2.29198300 | -0.78159500 | -0.12989500 |
| C  | -3.47879100 | -2.04596900 | -2.44092500 |
| O  | -2.36480100 | -1.88328100 | -1.84369700 |
| C  | -3.98984000 | -2.76203000 | 1.14865700  |
| O  | -4.99506700 | -2.11922500 | 0.70534000  |
| C  | -3.50390900 | 0.77485100  | 1.99648000  |
| O  | -4.60929100 | 0.65074300  | 1.37911300  |
| C  | -3.01820800 | 1.59290300  | -1.65372900 |
| O  | -1.99232100 | 0.94529000  | -1.24856000 |
| Rh | -4.65198100 | -0.41505800 | -0.37093200 |
| O  | -4.22846300 | 1.27458800  | -1.44120200 |
| O  | -2.76975400 | -2.43554200 | 0.98395100  |
| O  | -2.36966100 | 0.35613800  | 1.58809400  |
| O  | -4.59217100 | -1.54028600 | -2.08430000 |
| C  | -3.44982900 | -2.90269200 | -3.68108000 |
| H  | -4.45802500 | -3.21129600 | -3.95826500 |
| H  | -2.80790900 | -3.76938600 | -3.50432100 |
| H  | -3.01290400 | -2.32355800 | -4.50126200 |
| C  | -2.77721300 | 2.86452100  | -2.43191400 |
| H  | -2.48189700 | 3.66243900  | -1.74305000 |
| H  | -3.68893400 | 3.16166300  | -2.95014600 |
| H  | -1.96290300 | 2.71764500  | -3.14372200 |

|    |             |             |             |
|----|-------------|-------------|-------------|
| C  | -3.54616300 | 1.46821900  | 3.33637200  |
| H  | -3.99132800 | 2.46000500  | 3.22462500  |
| H  | -2.54607600 | 1.54544700  | 3.76262400  |
| H  | -4.18913900 | 0.89127000  | 4.00760500  |
| C  | -4.25565400 | -4.03730800 | 1.90792200  |
| H  | -3.38737200 | -4.30464900 | 2.51161300  |
| H  | -4.44294200 | -4.83882900 | 1.18549000  |
| H  | -5.14655800 | -3.92701500 | 2.52892600  |
| Br | -0.42713100 | -5.24697200 | -1.93768700 |
| O  | 0.57021500  | 0.52226900  | 2.36149000  |
| C  | 0.19747700  | -1.87136300 | 0.42836600  |
| H  | 0.03255000  | -1.60988200 | 1.46483100  |
| O  | 1.21777000  | 1.32577600  | -1.04579600 |
| C  | -0.14069800 | -3.16218500 | -0.00407200 |
| H  | -0.63750300 | -3.83461500 | 0.67995000  |
| O  | 0.15484100  | 3.26773200  | -1.47473300 |
| N  | -0.81306100 | 2.95300200  | 1.28834500  |
| C  | 0.13279700  | -3.53013400 | -1.30975600 |
| N  | -1.58330200 | 3.51077100  | 1.89697700  |
| C  | 0.78261100  | -2.65838700 | -2.18825600 |
| H  | 0.99315700  | -2.96754500 | -3.20584200 |
| C  | 1.15840500  | -1.39699600 | -1.74376000 |
| H  | 1.68672700  | -0.72637500 | -2.41200400 |
| C  | 0.86326300  | -0.98804200 | -0.43290500 |
| C  | 1.37764400  | 0.33493400  | 0.05575400  |
| C  | 0.64500500  | 0.94873900  | 1.23162000  |
| C  | 0.06357900  | 2.19639600  | 0.67814500  |
| C  | 0.50060000  | 2.33028300  | -0.65984400 |
| C  | 0.87928500  | 3.34354900  | -2.73932500 |
| H  | 1.92965400  | 3.51059100  | -2.49552300 |
| H  | 0.73114700  | 2.42125100  | -3.30317500 |
| H  | 0.43865700  | 4.19348900  | -3.25652300 |
| C  | 2.75141000  | -2.05026200 | 2.71139800  |
| C  | 3.63706600  | -1.78671200 | 1.73876500  |
| H  | 2.57382400  | -1.28294500 | 3.46423800  |
| H  | 3.78463000  | -2.48987800 | 0.91915700  |
| C  | 4.40669400  | -0.49980700 | 1.61106800  |
| H  | 5.49091700  | -0.71517500 | 1.66108900  |
| H  | 4.18156200  | 0.14961800  | 2.47611900  |
| O  | 4.09235300  | 0.11726700  | 0.38259600  |
| H  | 2.51757400  | 0.27309700  | 0.25455800  |
| C  | 1.89878600  | -3.24458500 | 2.81780400  |
| C  | 0.70746400  | -3.16854900 | 3.56306700  |
| C  | 2.18281400  | -4.45112900 | 2.15114300  |

|   |             |             |             |
|---|-------------|-------------|-------------|
| C | -0.18491600 | -4.23998800 | 3.60915600  |
| H | 0.46902500  | -2.24307100 | 4.08128700  |
| C | 1.29476600  | -5.52321100 | 2.19939700  |
| H | 3.10751900  | -4.54612300 | 1.59043600  |
| C | 0.10213700  | -5.42305200 | 2.92357200  |
| H | -1.10373300 | -4.15014600 | 4.18263000  |
| H | 1.53150400  | -6.44103700 | 1.66871100  |
| H | -0.58828700 | -6.26079700 | 2.95996200  |
| C | 8.03381200  | 1.54000100  | -0.51876000 |
| C | 6.70189000  | 1.46739100  | -0.64412800 |
| H | 8.48509400  | 2.52163200  | -0.36475000 |
| H | 6.20241100  | 0.51196300  | -0.79332500 |
| C | 5.76633700  | 2.64449600  | -0.56417700 |
| H | 5.33156700  | 2.81694500  | -1.57026800 |
| H | 6.33513700  | 3.55526400  | -0.31546600 |
| O | 4.74520600  | 2.43479900  | 0.39144300  |
| H | 4.44354900  | 1.27657400  | 0.40522900  |
| C | 8.98644400  | 0.42018900  | -0.58010100 |
| C | 10.36442000 | 0.69287100  | -0.64418200 |
| C | 8.58392700  | -0.92972600 | -0.56835000 |
| C | 11.30507400 | -0.33482700 | -0.70879000 |
| H | 10.69773300 | 1.72809800  | -0.64684400 |
| C | 9.52179700  | -1.95618900 | -0.63249300 |
| H | 7.52868700  | -1.17484200 | -0.49521900 |
| C | 10.88835000 | -1.66646700 | -0.70557500 |
| H | 12.36363300 | -0.09446600 | -0.76027200 |
| H | 9.18675800  | -2.98998500 | -0.61894000 |
| H | 11.61734200 | -2.47040600 | -0.75308900 |
| C | 0.36501400  | 5.81636100  | 0.92947400  |
| C | 1.36366900  | 5.54406200  | 0.07835400  |
| H | 0.53227100  | 5.62640400  | 1.99063900  |
| H | 1.24499900  | 5.74376300  | -0.98503400 |
| C | 2.63909300  | 4.84261200  | 0.44412300  |
| H | 3.50769400  | 5.47150500  | 0.18044700  |
| H | 2.68323900  | 4.68418000  | 1.53456800  |
| O | 2.66672400  | 3.62103700  | -0.26971000 |
| H | 3.54699700  | 3.11103400  | -0.00088300 |
| C | -0.98218600 | 6.29517000  | 0.58450300  |
| C | -1.84419100 | 6.73172300  | 1.60625400  |
| C | -1.48664300 | 6.25764000  | -0.73104600 |
| C | -3.15168700 | 7.13070000  | 1.32819400  |
| H | -1.47976300 | 6.75565300  | 2.63006400  |
| C | -2.79125200 | 6.65608900  | -1.00979700 |
| H | -0.85608300 | 5.89502200  | -1.53631000 |

|   |             |            |             |
|---|-------------|------------|-------------|
| C | -3.63212200 | 7.09519900 | 0.01868000  |
| H | -3.79598000 | 7.46514700 | 2.13613100  |
| H | -3.15894200 | 6.61653700 | -2.03146500 |
| H | -4.65139900 | 7.39860000 | -0.20028500 |

2-TS4-1

0 1

|    |             |             |             |
|----|-------------|-------------|-------------|
| Br | -5.72090700 | 3.50149000  | 0.13786400  |
| O  | 1.01786100  | 2.36687700  | -2.37407200 |
| C  | -1.84486000 | 2.74042900  | -1.20734500 |
| H  | -1.34358300 | 2.63761800  | -2.16148200 |
| O  | 0.59588000  | 1.02583400  | 0.89025900  |
| C  | -3.20496800 | 3.04022300  | -1.16244300 |
| H  | -3.77043600 | 3.17198800  | -2.07829300 |
| O  | 2.57468300  | 0.00743700  | 1.44995900  |
| N  | 3.20589700  | 0.55251800  | -1.36723700 |
| C  | -3.83804900 | 3.15440500  | 0.07456600  |
| N  | 4.04450900  | 0.17784900  | -2.03050200 |
| C  | -3.12945700 | 3.00721800  | 1.26562600  |
| H  | -3.63452800 | 3.10722500  | 2.21949300  |
| C  | -1.76893800 | 2.72182600  | 1.20874100  |
| H  | -1.20898100 | 2.58898400  | 2.12892500  |
| C  | -1.11681600 | 2.56149400  | -0.02234600 |
| C  | 0.31721400  | 2.21926700  | -0.02477800 |
| C  | 1.10195300  | 1.91110800  | -1.24738600 |
| C  | 2.17999900  | 1.01275300  | -0.70877400 |
| C  | 1.87055100  | 0.73609500  | 0.65164100  |
| C  | 2.13963200  | -0.03714900 | 2.84649500  |
| H  | 1.22422700  | -0.62558800 | 2.92103600  |
| H  | 2.00181500  | 0.99245100  | 3.17868500  |
| H  | 2.96138500  | -0.52205200 | 3.36966300  |
| Rh | -0.65483400 | -1.03241000 | 0.29421700  |
| C  | -1.47204600 | -0.79830000 | -2.46418400 |
| O  | -0.85198900 | -0.17513800 | -1.53927600 |
| C  | -3.52397000 | -0.91439000 | 0.63423100  |
| O  | -3.58546800 | -2.04414200 | 0.04664900  |
| C  | -1.02289500 | -3.16215000 | 2.21389900  |
| O  | -1.63892200 | -3.79168500 | 1.29749100  |
| C  | 1.02320400  | -3.05728500 | -0.92379500 |
| O  | 1.08835000  | -1.91256500 | -0.36012100 |
| Rh | -1.84299900 | -2.92592100 | -0.55200600 |
| O  | -0.03903600 | -3.72258800 | -1.13066200 |
| O  | -2.45365700 | -0.27553400 | 0.90119800  |
| O  | -0.48518800 | -2.00872300 | 2.09765400  |

|   |             |             |             |
|---|-------------|-------------|-------------|
| O | -1.98805500 | -1.95598600 | -2.35558200 |
| C | -1.62347400 | -0.06889800 | -3.77359800 |
| H | -2.54352900 | 0.52415800  | -3.73002400 |
| H | -0.78384600 | 0.61366100  | -3.91763500 |
| H | -1.70656000 | -0.77708600 | -4.59903900 |
| C | 2.33305500  | -3.66960400 | -1.35552700 |
| H | 2.85808000  | -4.04006700 | -0.46893800 |
| H | 2.16110800  | -4.49827000 | -2.04247500 |
| H | 2.96374400  | -2.90835100 | -1.82055800 |
| C | -0.94161900 | -3.81663400 | 3.57103700  |
| H | -1.09491800 | -4.89268000 | 3.48505500  |
| H | 0.02134300  | -3.59862800 | 4.03716500  |
| H | -1.72796500 | -3.39777900 | 4.20796200  |
| C | -4.82303300 | -0.25973100 | 1.02674400  |
| H | -4.70954000 | 0.24447000  | 1.98805100  |
| H | -5.07199600 | 0.50669800  | 0.28649500  |
| H | -5.62575500 | -0.99656800 | 1.06445700  |
| C | 5.34397700  | 2.40767700  | 0.04388800  |
| C | 4.54551700  | 2.69747000  | 1.08177700  |
| H | 5.08292500  | 2.82917600  | -0.92833200 |
| H | 4.74257000  | 2.28448300  | 2.07003200  |
| C | 3.29658300  | 3.53470300  | 0.99419400  |
| H | 3.44088000  | 4.47286500  | 1.56113100  |
| H | 3.13449200  | 3.83500500  | -0.05944200 |
| O | 2.20008000  | 2.83070300  | 1.51914000  |
| H | 1.17968100  | 2.90502300  | 0.70703200  |
| C | 6.53878900  | 1.55068900  | 0.04240300  |
| C | 7.13636600  | 1.21973500  | -1.18705700 |
| C | 7.11028000  | 1.02311900  | 1.21625400  |
| C | 8.25313000  | 0.38665200  | -1.24747000 |
| H | 6.71271700  | 1.61884500  | -2.10501500 |
| C | 8.22447300  | 0.19135800  | 1.15701900  |
| H | 6.68499900  | 1.27486000  | 2.18292900  |
| C | 8.80193100  | -0.13361000 | -0.07499300 |
| H | 8.69426900  | 0.14583000  | -2.21055400 |
| H | 8.65022600  | -0.20197300 | 2.07607500  |
| H | 9.67308300  | -0.78081700 | -0.11699900 |

2-TS4-2

O 1

|    |             |             |             |
|----|-------------|-------------|-------------|
| Rh | -1.33385100 | -1.45496800 | -0.26672500 |
| C  | -3.17339600 | -1.52610900 | 1.96563400  |
| O  | -2.66691900 | -0.74163500 | 1.09931700  |
| C  | -3.41731300 | -3.16764600 | -1.33949600 |

|    |             |             |             |
|----|-------------|-------------|-------------|
| O  | -3.07251300 | -4.04176400 | -0.48072000 |
| C  | 0.26066400  | -3.56807800 | -1.45068600 |
| O  | -0.21084600 | -4.34442300 | -0.55991000 |
| C  | 0.53939100  | -1.92912800 | 1.90320600  |
| O  | 0.22802200  | -1.04929100 | 1.03103000  |
| Rh | -1.54648500 | -3.59491100 | 0.80116300  |
| O  | -0.01218000 | -3.06387800 | 2.04866200  |
| O  | -2.87816400 | -2.02288100 | -1.49394300 |
| O  | 0.01163300  | -2.32296500 | -1.56498300 |
| O  | -2.89854700 | -2.76339800 | 2.09526900  |
| C  | -4.16432400 | -0.91484100 | 2.92321100  |
| H  | -4.78318700 | -1.68877200 | 3.37826800  |
| H  | -4.77625700 | -0.18046400 | 2.39450100  |
| H  | -3.61376000 | -0.39137200 | 3.71212100  |
| C  | 1.67379300  | -1.58557900 | 2.83893900  |
| H  | 2.59028200  | -1.44872200 | 2.25879100  |
| H  | 1.81451300  | -2.37482000 | 3.57684600  |
| H  | 1.45416800  | -0.63872200 | 3.33991700  |
| C  | 1.21568600  | -4.17337100 | -2.45149300 |
| H  | 2.17163400  | -4.38008100 | -1.96000400 |
| H  | 1.37446100  | -3.49100600 | -3.28693000 |
| H  | 0.81600300  | -5.12568300 | -2.80686300 |
| C  | -4.58143100 | -3.49392600 | -2.24086100 |
| H  | -4.35743700 | -3.18101700 | -3.26302300 |
| H  | -5.45526200 | -2.92790600 | -1.90176000 |
| H  | -4.80760300 | -4.55967400 | -2.20426600 |
| Br | -5.38313200 | 1.82583700  | 0.07300900  |
| O  | 0.75534900  | -0.05383100 | -3.35467000 |
| C  | -1.81210600 | 0.85084800  | -1.86182300 |
| H  | -1.52423700 | 0.33650900  | -2.77129400 |
| O  | 1.43089400  | 1.41498700  | -0.17596600 |
| C  | -3.17251700 | 0.99541400  | -1.54772600 |
| H  | -3.91954400 | 0.52266400  | -2.17187700 |
| O  | 3.27111500  | 0.36141300  | 0.63593900  |
| N  | 3.14836800  | -1.11401600 | -1.86037900 |
| C  | -3.53634700 | 1.69172800  | -0.40593800 |
| N  | 3.80263400  | -1.95533400 | -2.24239200 |
| C  | -2.57835700 | 2.26957500  | 0.43037300  |
| H  | -2.87506800 | 2.82449600  | 1.31152000  |
| C  | -1.23652500 | 2.13984400  | 0.10946300  |
| H  | -0.49590900 | 2.60348400  | 0.74661200  |
| C  | -0.83374000 | 1.43521100  | -1.03846400 |
| C  | 0.60980000  | 1.44004200  | -1.42067100 |
| C  | 1.14785800  | 0.31632600  | -2.27301500 |

|   |             |             |             |
|---|-------------|-------------|-------------|
| C | 2.33198900  | -0.16006700 | -1.50574400 |
| C | 2.41977900  | 0.59431600  | -0.30770300 |
| C | 3.41660400  | 1.37747000  | 1.67858500  |
| H | 3.62652400  | 2.31880000  | 1.16994200  |
| H | 2.49976300  | 1.41772900  | 2.26848600  |
| H | 4.26143700  | 1.03396100  | 2.27113000  |
| C | -0.41648400 | 5.41874900  | -0.79101000 |
| C | 0.81859200  | 4.89952300  | -0.86843500 |
| H | -0.85018800 | 5.82982600  | -1.70339600 |
| H | 1.28073800  | 4.42459800  | -0.00198100 |
| C | 1.64284700  | 4.82949500  | -2.13174100 |
| H | 2.57146600  | 5.41260700  | -1.96995800 |
| H | 1.09811500  | 5.33881500  | -2.94546300 |
| O | 1.94829100  | 3.50752900  | -2.48424700 |
| H | 0.98446200  | 2.42796800  | -1.95186700 |
| C | -1.30079500 | 5.44089500  | 0.38309400  |
| C | -2.67725000 | 5.66529800  | 0.20009700  |
| C | -0.84425400 | 5.19980800  | 1.69313500  |
| C | -3.56877100 | 5.61823100  | 1.27112200  |
| H | -3.05165100 | 5.85311400  | -0.80285300 |
| C | -1.73324000 | 5.14738300  | 2.76450000  |
| H | 0.21780700  | 5.05836300  | 1.87139800  |
| C | -3.10245100 | 5.35171200  | 2.56027600  |
| H | -4.62907700 | 5.77645300  | 1.09690100  |
| H | -1.35689800 | 4.95718900  | 3.76615800  |
| H | -3.79341700 | 5.31233600  | 3.39718500  |
| C | 6.63915700  | 1.47954700  | -0.05092400 |
| C | 5.71913900  | 1.39384000  | -1.02158400 |
| H | 6.97872500  | 2.47165600  | 0.25016600  |
| H | 5.39795600  | 0.41144800  | -1.36497800 |
| C | 4.97621700  | 2.56555500  | -1.60344900 |
| H | 4.94607400  | 2.49007500  | -2.70403000 |
| H | 5.51787200  | 3.49754300  | -1.36333300 |
| O | 3.67540400  | 2.57142800  | -1.06045500 |
| H | 2.93310900  | 3.04742800  | -1.74268600 |
| C | 7.24758800  | 0.34954700  | 0.66962000  |
| C | 8.49657200  | 0.50848600  | 1.29527600  |
| C | 6.60362900  | -0.89752700 | 0.78603400  |
| C | 9.09656400  | -0.54533900 | 1.98322300  |
| H | 9.00326400  | 1.46808900  | 1.22834700  |
| C | 7.20249900  | -1.95103900 | 1.47303600  |
| H | 5.61497400  | -1.02768000 | 0.35681500  |
| C | 8.45427500  | -1.78211700 | 2.07179000  |
| H | 10.06610700 | -0.40080400 | 2.45159700  |



|     |             |             |             |
|-----|-------------|-------------|-------------|
| H   | 6.68708100  | -2.90448600 | 1.55211300  |
| H   | 8.91835300  | -2.60307000 | 2.61042700  |
| 3   |             |             |             |
| 0 1 |             |             |             |
| Br  | -5.62802400 | 1.21499000  | -0.11685300 |
| O   | 0.48792700  | -1.44945300 | 2.23191900  |
| C   | -2.54653800 | -1.24023700 | 1.24263100  |
| H   | -2.23806200 | -1.67623900 | 2.18769700  |
| O   | 0.59615800  | 1.42711600  | 1.00925000  |
| C   | -3.69043100 | -0.44963700 | 1.18575200  |
| H   | -4.29169400 | -0.28160700 | 2.07153600  |
| O   | 1.79095700  | 1.41170700  | -0.91231400 |
| C   | -4.05344200 | 0.13074400  | -0.02976200 |
| C   | -3.29084600 | -0.06368100 | -1.17808700 |
| H   | -3.58745600 | 0.39648900  | -2.11371700 |
| C   | -2.14347500 | -0.85502600 | -1.10808100 |
| H   | -1.54001600 | -1.02072800 | -1.99229700 |
| C   | -1.76959700 | -1.45360300 | 0.09756100  |
| C   | -0.49720200 | -2.28018600 | 0.20054400  |
| C   | 0.51367300  | -1.44707700 | 1.02142600  |
| C   | 1.49102800  | -0.64543900 | 0.19589900  |
| C   | 1.22202500  | 0.82867800  | 0.16315600  |
| C   | 1.74372800  | 2.84974600  | -0.92319300 |
| H   | 2.29729400  | 3.24712400  | -0.06848600 |
| H   | 0.71061300  | 3.20140900  | -0.87724300 |
| H   | 2.21689400  | 3.15056000  | -1.85730200 |
| C   | 2.94175400  | -1.14506000 | 0.18102300  |
| C   | 2.04948500  | -1.39077600 | -1.00222500 |
| H   | 3.10165600  | -1.99842400 | 0.84052300  |
| H   | 2.22077400  | -0.79316600 | -1.89101800 |
| C   | 1.38239900  | -2.74248800 | -1.19250600 |
| H   | 1.58463400  | -3.15137000 | -2.18482100 |
| H   | 1.74652500  | -3.47060800 | -0.44975200 |
| O   | -0.03719500 | -2.61211500 | -1.10463700 |
| H   | -0.68758400 | -3.19628600 | 0.78058800  |
| C   | 4.07575000  | -0.16783900 | 0.15790400  |
| C   | 4.28809100  | 0.66657100  | 1.26358100  |
| C   | 4.93809900  | -0.08047300 | -0.93834500 |
| C   | 5.34371200  | 1.57720600  | 1.26778500  |
| H   | 3.60795400  | 0.60897700  | 2.10925000  |
| C   | 5.99740700  | 0.82854800  | -0.93390900 |
| H   | 4.77422700  | -0.72242100 | -1.79907500 |
| C   | 6.20174200  | 1.66010100  | 0.16805200  |

|      |             |             |             |
|------|-------------|-------------|-------------|
| H    | 5.49469900  | 2.22388900  | 2.12714900  |
| H    | 6.66009200  | 0.88898900  | -1.79234300 |
| H    | 7.02333400  | 2.37028700  | 0.17019600  |
| 3-TS |             |             |             |
| O 1  |             |             |             |
| C    | -0.88960000 | 2.20899300  | 0.09684900  |
| C    | 0.70563200  | 0.75784800  | 0.94237700  |
| H    | 0.50891100  | 0.71800800  | 2.02451600  |
| C    | 2.11000000  | 0.30130500  | 0.63822200  |
| C    | 2.61273600  | -0.83432900 | 1.28195400  |
| C    | 2.89422200  | 0.95838200  | -0.31290100 |
| C    | 3.88889700  | -1.30856900 | 0.98777800  |
| H    | 2.00200400  | -1.35846800 | 2.01048100  |
| C    | 4.17665800  | 0.49773600  | -0.60988200 |
| H    | 2.49960900  | 1.83416400  | -0.81455500 |
| C    | 4.66156600  | -0.63272000 | 0.04411000  |
| H    | 4.28088100  | -2.18798600 | 1.48516800  |
| H    | 4.79130600  | 1.00890300  | -1.34186600 |
| Br   | 6.42116300  | -1.26784800 | -0.35544600 |
| O    | 0.46868500  | 2.07514600  | 0.44709400  |
| C    | -0.35824900 | -0.12861100 | 0.23960400  |
| O    | -0.35851300 | -1.33807200 | 0.19250600  |
| C    | -1.38496900 | 0.81396700  | -0.28938000 |
| N    | -1.95325200 | 0.58576500  | -1.49352000 |
| N    | -3.01794100 | 0.39435500  | -1.92405800 |
| O    | -1.06369200 | 3.10653900  | -0.92908700 |
| C    | -0.62621300 | 4.44364100  | -0.63628200 |
| H    | 0.45765900  | 4.47159100  | -0.49049400 |
| H    | -0.89989500 | 5.04086800  | -1.50628300 |
| H    | -1.12484300 | 4.82875200  | 0.25765200  |
| O    | -1.56320000 | 2.57983300  | 1.28344200  |
| C    | -2.95972400 | 2.26066100  | 1.19444100  |
| H    | -3.37275500 | 2.51210700  | 2.17563800  |
| H    | -3.44646100 | 2.88948000  | 0.43666200  |
| C    | -3.14397000 | 0.79615600  | 0.86166800  |
| C    | -4.17134600 | 0.37259100  | 0.01302900  |
| H    | -2.79371200 | 0.10262000  | 1.62306000  |
| H    | -4.82725700 | 1.13377900  | -0.40411000 |
| C    | -4.67192600 | -1.00983500 | -0.03196200 |
| C    | -6.01455400 | -1.25798900 | -0.36384200 |
| C    | -3.83262000 | -2.10973700 | 0.22771100  |
| C    | -6.51275600 | -2.55854900 | -0.40849400 |
| H    | -6.67190000 | -0.41971900 | -0.58069300 |
| C    | -4.33347900 | -3.40856800 | 0.18238000  |

|   |             |             |             |
|---|-------------|-------------|-------------|
| H | -2.77631200 | -1.95210400 | 0.42582100  |
| C | -5.67537400 | -3.64049300 | -0.13048200 |
| H | -7.55568000 | -2.72733100 | -0.66127300 |
| H | -3.66860400 | -4.24475700 | 0.37910000  |
| H | -6.06113800 | -4.65490700 | -0.16820700 |

3-TS-R

0 1

|    |             |             |             |
|----|-------------|-------------|-------------|
| Rh | 0.82708600  | -0.96925600 | 0.23206800  |
| C  | 3.41397400  | -0.25590800 | 1.36654700  |
| O  | 2.16062200  | -0.00510000 | 1.46558500  |
| C  | 2.10057200  | 0.14705300  | -2.15053200 |
| O  | 2.92330300  | -0.81898500 | -2.13080100 |
| C  | 0.17612600  | -2.99400800 | -1.75799800 |
| O  | 1.40789000  | -3.28212800 | -1.80724900 |
| C  | 1.50015100  | -3.37973800 | 1.70482200  |
| O  | 0.67109100  | -2.40449700 | 1.69082800  |
| Rh | 2.73176400  | -2.22303300 | -0.64730000 |
| O  | 2.44708700  | -3.56463900 | 0.88341900  |
| O  | 1.14024200  | 0.33425400  | -1.32870800 |
| O  | -0.35944800 | -2.08446700 | -1.03270200 |
| O  | 3.94163100  | -1.08274900 | 0.56598800  |
| C  | 4.31515000  | 0.52721800  | 2.28754600  |
| H  | 4.04520100  | 0.30983100  | 3.32526500  |
| H  | 5.35901100  | 0.27037000  | 2.11049200  |
| H  | 4.15478500  | 1.59488000  | 2.11580700  |
| C  | 1.30792800  | -4.38686500 | 2.81217400  |
| H  | 1.37589800  | -3.87862900 | 3.77826900  |
| H  | 0.30406800  | -4.81441200 | 2.73762000  |
| H  | 2.05861600  | -5.17427300 | 2.74808300  |
| C  | -0.77306300 | -3.77577400 | -2.63390000 |
| H  | -1.58117400 | -4.18312000 | -2.02051500 |
| H  | -1.22261800 | -3.09946800 | -3.36747900 |
| H  | -0.24512500 | -4.57824400 | -3.14867500 |
| C  | 2.29690400  | 1.21396900  | -3.19874200 |
| H  | 1.35546800  | 1.72586200  | -3.40055700 |
| H  | 3.01425200  | 1.94596300  | -2.81007900 |
| H  | 2.71338700  | 0.77718600  | -4.10785400 |
| C  | -1.18634400 | 1.52691800  | 0.59822000  |
| C  | -2.69153800 | 0.04482100  | -0.48329600 |
| H  | -2.39805400 | -0.55527400 | -1.35106100 |
| C  | -4.18066900 | 0.25757700  | -0.45433400 |
| C  | -4.94395100 | -0.01860900 | -1.59224900 |
| C  | -4.82030100 | 0.75445100  | 0.68963500  |

|     |             |             |             |
|-----|-------------|-------------|-------------|
| C   | -6.32123100 | 0.20466300  | -1.60496100 |
| H   | -4.45971000 | -0.40694000 | -2.48421600 |
| C   | -6.19330500 | 0.98354200  | 0.69350000  |
| H   | -4.23672600 | 0.96199900  | 1.58008300  |
| C   | -6.93251600 | 0.70766000  | -0.45848600 |
| H   | -6.90956000 | -0.00640600 | -2.49051500 |
| H   | -6.68820600 | 1.36690500  | 1.57849100  |
| Br  | -8.81686800 | 1.02468400  | -0.46086300 |
| O   | -1.95547500 | 1.29875700  | -0.56967500 |
| C   | -2.10118000 | -0.63816700 | 0.76119000  |
| O   | -2.59031300 | -1.53149300 | 1.41068100  |
| C   | -0.79323500 | 0.07182000  | 0.93127300  |
| N   | -0.60201000 | -0.02533200 | 2.81909400  |
| N   | -0.16295400 | -0.51035500 | 3.71249000  |
| O   | -1.95820600 | 2.02681400  | 1.66712700  |
| C   | -2.58419300 | 3.28989100  | 1.39220400  |
| H   | -3.26235100 | 3.20422000  | 0.53828200  |
| H   | -3.14791700 | 3.54464000  | 2.29073200  |
| H   | -1.83862100 | 4.06331000  | 1.18694000  |
| O   | -0.21505000 | 2.40833900  | 0.19243000  |
| C   | 0.78587900  | 2.76890900  | 1.16399400  |
| H   | 0.51745000  | 3.72058000  | 1.64053900  |
| H   | 0.84126900  | 1.99832300  | 1.94050300  |
| C   | 2.09573800  | 2.83203300  | 0.45167100  |
| C   | 3.03450300  | 3.77553300  | 0.59530200  |
| H   | 2.25516700  | 1.98851200  | -0.20519400 |
| H   | 2.83346000  | 4.64046900  | 1.22857500  |
| C   | 4.35566200  | 3.74547100  | -0.05562800 |
| C   | 5.13526300  | 4.91373300  | -0.09830300 |
| C   | 4.88297700  | 2.57605600  | -0.64122300 |
| C   | 6.38295900  | 4.92543700  | -0.72188500 |
| H   | 4.75135800  | 5.82385400  | 0.35621800  |
| C   | 6.12708800  | 2.58837100  | -1.26611400 |
| H   | 4.33251300  | 1.64191400  | -0.59310200 |
| C   | 6.88327300  | 3.76372900  | -1.31212200 |
| H   | 6.96469600  | 5.84262600  | -0.74549700 |
| H   | 6.51153600  | 1.67294500  | -1.70699500 |
| H   | 7.85610500  | 3.76967700  | -1.79483900 |
| 4   |             |             |             |
| O 1 |             |             |             |
| C   | -0.52932600 | 0.71794700  | -0.02883900 |
| C   | 1.46452200  | 1.07913700  | -1.27133400 |
| H   | 1.47423600  | 1.38874000  | -2.32286400 |

|    |             |             |             |
|----|-------------|-------------|-------------|
| C  | 2.75686200  | 0.38348500  | -0.90721700 |
| C  | 3.94422300  | 0.73883300  | -1.55311400 |
| C  | 2.78813100  | -0.56375300 | 0.12120300  |
| C  | 5.15398100  | 0.14956300  | -1.18916600 |
| H  | 3.92861700  | 1.48384400  | -2.34314900 |
| C  | 3.99015000  | -1.16403100 | 0.49081800  |
| H  | 1.86893600  | -0.82208800 | 0.63537200  |
| C  | 5.16273100  | -0.80156900 | -0.17043500 |
| H  | 6.07570300  | 0.42024400  | -1.69101500 |
| H  | 4.01911400  | -1.90211000 | 1.28411700  |
| Br | 6.81480600  | -1.62689900 | 0.33002900  |
| O  | 0.32138800  | 0.25095700  | -1.04879100 |
| C  | 1.27345800  | 2.33694000  | -0.39167500 |
| O  | 1.99937200  | 3.30907600  | -0.37591200 |
| C  | 0.08643800  | 2.03567400  | 0.38961100  |
| N  | -0.32383600 | 2.75985600  | 1.38685100  |
| N  | -0.64481100 | 3.42323400  | 2.25271700  |
| O  | -0.53760100 | -0.13805300 | 1.08103000  |
| C  | -1.03470400 | -1.45940200 | 0.80507000  |
| H  | -0.44697200 | -1.93243200 | 0.01269900  |
| H  | -0.92083700 | -2.01690000 | 1.73556000  |
| H  | -2.08761400 | -1.43357000 | 0.50879100  |
| O  | -1.78790100 | 0.79770700  | -0.63040400 |
| C  | -2.85545300 | 1.27009800  | 0.21687800  |
| H  | -2.67754900 | 0.97682200  | 1.25781000  |
| H  | -2.87561400 | 2.36939300  | 0.16502000  |
| C  | -4.13625600 | 0.68449900  | -0.28488800 |
| C  | -4.97080200 | -0.02361800 | 0.48939000  |
| H  | -4.35209600 | 0.86871600  | -1.33454600 |
| H  | -4.68449900 | -0.17997700 | 1.53020500  |
| C  | -6.25607100 | -0.62658300 | 0.10935400  |
| C  | -6.97398100 | -1.35222800 | 1.07563500  |
| C  | -6.80702700 | -0.51781200 | -1.18126700 |
| C  | -8.19502900 | -1.95065600 | 0.76930500  |
| H  | -6.56574800 | -1.44668500 | 2.07881100  |
| C  | -8.02509100 | -1.11559400 | -1.48827100 |
| H  | -6.28076700 | 0.03841000  | -1.95048700 |
| C  | -8.72592200 | -1.83507500 | -0.51536300 |
| H  | -8.73045400 | -2.50619900 | 1.53359500  |
| H  | -8.43226700 | -1.01993600 | -2.49062600 |
| H  | -9.67696000 | -2.29906000 | -0.75883500 |

5  
0 1

|    |             |             |             |
|----|-------------|-------------|-------------|
| C  | -6.13244800 | -0.29059600 | -0.34462700 |
| H  | -6.50805100 | 0.71879000  | -0.49181400 |
| C  | -7.02698000 | -1.34511000 | -0.15156000 |
| H  | -8.09577500 | -1.15249900 | -0.14743500 |
| C  | -6.54726800 | -2.64196600 | 0.03298700  |
| H  | -7.24189800 | -3.46348800 | 0.18119000  |
| C  | -5.17047300 | -2.88144800 | 0.02352800  |
| H  | -4.79192800 | -3.88993400 | 0.16089600  |
| C  | -4.27682200 | -1.82949800 | -0.16746700 |
| H  | -3.20628100 | -2.02099300 | -0.17746000 |
| C  | -4.75469000 | -0.52315000 | -0.34842700 |
| C  | -3.77162600 | 0.61237100  | -0.54011700 |
| H  | -4.31322200 | 1.54164300  | -0.74921900 |
| N  | -2.94134500 | 0.33452600  | -1.75753200 |
| N  | -1.72815800 | 0.26886100  | -1.52096100 |
| C  | -1.41630500 | 0.54541100  | -0.09839000 |
| C  | -2.76096200 | 0.78474500  | 0.62533200  |
| H  | -2.95895400 | 0.05012200  | 1.40707500  |
| C  | -2.60778300 | 2.20157700  | 1.21894100  |
| H  | -3.51034500 | 2.81188500  | 1.13568400  |
| H  | -2.30925400 | 2.14443200  | 2.27229300  |
| O  | -1.58245300 | 2.84267300  | 0.45446100  |
| C  | -0.64530300 | 1.86591400  | 0.12060000  |
| O  | 0.17857200  | 1.61302900  | 1.26736700  |
| C  | 0.54964900  | 0.22783300  | 1.34964200  |
| H  | 0.44686600  | -0.07266500 | 2.39878700  |
| C  | -0.53005600 | -0.51192000 | 0.53686100  |
| O  | 0.07983000  | 2.24455100  | -0.98131000 |
| C  | 0.91251200  | 3.39855200  | -0.78784200 |
| H  | 1.66664100  | 3.20422400  | -0.01987200 |
| H  | 0.30985600  | 4.26672300  | -0.50593900 |
| H  | 1.39537400  | 3.57744000  | -1.74880200 |
| O  | -0.67623600 | -1.70786500 | 0.46401100  |
| C  | 1.95877000  | -0.07015500 | 0.88219300  |
| C  | 2.32749800  | 0.09452600  | -0.46074700 |
| H  | 1.59907100  | 0.44977800  | -1.18177800 |
| C  | 3.62705900  | -0.18229500 | -0.87687300 |
| H  | 3.91245300  | -0.05667100 | -1.91501200 |
| C  | 4.56126300  | -0.63129900 | 0.05706500  |
| C  | 4.21651900  | -0.80904400 | 1.39446200  |
| H  | 4.95384600  | -1.15957900 | 2.10733500  |
| C  | 2.91151100  | -0.52585100 | 1.79725600  |
| H  | 2.63800600  | -0.66082000 | 2.84013600  |
| Br | 6.34737200  | -1.01093700 | -0.50942100 |

Int1

0 1

|    |             |             |             |
|----|-------------|-------------|-------------|
| Rh | 0.75107300  | -0.27920800 | 0.16508100  |
| C  | 0.83831600  | -1.46519800 | -2.50299400 |
| O  | 0.12491000  | -0.71355500 | -1.75089400 |
| C  | 0.45001800  | -3.09356600 | 0.82701600  |
| O  | 1.63008200  | -3.28262700 | 0.41122700  |
| C  | 2.69216800  | -0.52060000 | 2.32444000  |
| O  | 3.37981100  | -1.28567500 | 1.58475300  |
| C  | 3.06845500  | 1.10000100  | -0.96825100 |
| O  | 1.87562500  | 1.29534500  | -0.54870200 |
| Rh | 2.71321600  | -1.69043600 | -0.31412300 |
| O  | 3.67819000  | -0.00771600 | -1.00415400 |
| O  | -0.18281200 | -1.97940600 | 0.83712600  |
| O  | 1.58027700  | 0.03225500  | 2.01760700  |
| O  | 1.93907800  | -2.00679100 | -2.19437600 |
| C  | 0.28293600  | -1.72253500 | -3.88443200 |
| H  | 1.00873000  | -2.26184200 | -4.49305000 |
| H  | -0.63427700 | -2.31357000 | -3.79792800 |
| H  | 0.01783900  | -0.77220200 | -4.35461000 |
| C  | 3.80015600  | 2.31931900  | -1.48153300 |
| H  | 3.23315700  | 3.22561000  | -1.26656100 |
| H  | 4.79153500  | 2.36898600  | -1.02478700 |
| H  | 3.94107900  | 2.21963400  | -2.56242400 |
| C  | 3.21733500  | -0.20316600 | 3.70417000  |
| H  | 3.47927100  | 0.85842200  | 3.74960800  |
| H  | 2.43089800  | -0.37721800 | 4.44265600  |
| H  | 4.09547600  | -0.80909200 | 3.92744900  |
| C  | -0.30053600 | -4.27704300 | 1.39010800  |
| H  | -1.32315600 | -4.28678300 | 1.00566200  |
| H  | 0.21322100  | -5.20609200 | 1.14265200  |
| H  | -0.35748000 | -4.17209500 | 2.47827400  |
| Br | -6.76356400 | -0.65926800 | -0.15192900 |
| O  | -0.61957700 | 1.97915800  | 2.64335700  |
| C  | -3.27524400 | 1.23306600  | 1.06321600  |
| H  | -3.01619500 | 2.07150000  | 1.69954800  |
| O  | -0.70587300 | 2.56450600  | -1.44520400 |
| C  | -4.60808200 | 0.89472200  | 0.89953200  |
| H  | -5.39155100 | 1.46661700  | 1.38266700  |
| O  | 0.76247400  | 4.28855700  | -1.23898300 |
| N  | 0.68648200  | 4.07229600  | 1.41269700  |
| C  | -4.93468200 | -0.20142300 | 0.09169700  |
| N  | 1.23159200  | 4.80375500  | 2.08250500  |

|   |             |             |             |
|---|-------------|-------------|-------------|
| C | -3.94839600 | -0.96374400 | -0.54024800 |
| H | -4.22904900 | -1.80451500 | -1.16387900 |
| C | -2.61422500 | -0.63235600 | -0.35605400 |
| H | -1.84172800 | -1.20473300 | -0.84804700 |
| C | -2.24213200 | 0.47787900  | 0.44496600  |
| C | -0.86295700 | 0.82974200  | 0.61001200  |
| C | -0.52511600 | 2.02844000  | 1.41959000  |
| C | 0.03063800  | 3.18446100  | 0.69646100  |
| C | -0.01547200 | 3.29556600  | -0.76056900 |
| C | 0.77084300  | 4.40969500  | -2.67479100 |
| H | -0.24107200 | 4.57375800  | -3.05278500 |
| H | 1.17888500  | 3.50085800  | -3.12405100 |
| H | 1.40800500  | 5.26679500  | -2.89049600 |

Int1'

0 1

|    |             |             |             |
|----|-------------|-------------|-------------|
| Rh | -1.50838500 | 0.20439100  | -0.09769200 |
| C  | -0.27776500 | -2.43044900 | -0.09638100 |
| O  | 0.00780500  | -1.18047500 | -0.09578300 |
| C  | -2.35765600 | -0.80754100 | -2.69958400 |
| O  | -3.07822500 | -1.66157800 | -2.10305800 |
| C  | -4.30663300 | 0.95240100  | -0.04909600 |
| O  | -4.58812100 | -0.28229500 | -0.03647800 |
| C  | -2.29530400 | -0.75413600 | 2.55348700  |
| O  | -1.58956600 | 0.13047200  | 1.95313800  |
| Rh | -3.07942800 | -1.67859900 | -0.05442500 |
| O  | -3.01594200 | -1.63121200 | 1.99552300  |
| O  | -1.61251600 | 0.06997200  | -2.14146800 |
| O  | -3.13299200 | 1.46396700  | -0.08681000 |
| O  | -1.43873100 | -2.93195000 | -0.07265800 |
| C  | 0.89977600  | -3.37246100 | -0.16334800 |
| H  | 1.77872800  | -2.91712800 | 0.29603200  |
| H  | 0.65201400  | -4.31942600 | 0.31804800  |
| H  | 1.12790000  | -3.56845200 | -1.21647300 |
| C  | -2.23293400 | -0.72103300 | 4.05960700  |
| H  | -1.20175300 | -0.90229400 | 4.37627000  |
| H  | -2.51211400 | 0.27567300  | 4.41159200  |
| H  | -2.89558700 | -1.47431000 | 4.48521600  |
| C  | -5.44760100 | 1.94042700  | -0.00513000 |
| H  | -5.40790300 | 2.48742800  | 0.94191800  |
| H  | -5.33221100 | 2.66800800  | -0.81267100 |
| H  | -6.40346600 | 1.42418300  | -0.09181300 |
| C  | -2.36394300 | -0.79465800 | -4.20820000 |
| H  | -2.78003900 | 0.15569800  | -4.55535400 |



|    |             |             |             |
|----|-------------|-------------|-------------|
| H  | -1.33667200 | -0.85644300 | -4.57648300 |
| H  | -2.95793700 | -1.62352100 | -4.59300900 |
| Br | 8.05698000  | -0.52358900 | -0.32494800 |
| O  | 1.47137700  | 1.88983100  | -1.55049200 |
| N  | 1.54544600  | 0.54874700  | 1.69047800  |
| C  | 4.14153800  | 0.80569400  | -0.90438100 |
| H  | 3.56893900  | 1.23189400  | -1.71712800 |
| O  | -0.61803200 | 3.39072900  | 1.41401200  |
| N  | 1.11470800  | 0.21487300  | 2.68464700  |
| C  | 5.48236400  | 0.48111500  | -1.09712900 |
| H  | 5.94833400  | 0.65708500  | -2.05993700 |
| O  | -1.18234900 | 3.77406100  | -0.75739000 |
| C  | 6.22060900  | -0.07383300 | -0.05382400 |
| C  | 5.63027300  | -0.30513200 | 1.18784900  |
| H  | 6.20921600  | -0.73540000 | 1.99693800  |
| C  | 4.29208800  | 0.02386300  | 1.37959400  |
| H  | 3.85264500  | -0.15795800 | 2.35590400  |
| C  | 3.52443700  | 0.58132700  | 0.34038000  |
| C  | 2.09987000  | 0.90566000  | 0.54010500  |
| C  | 1.19166800  | 1.51934100  | -0.40585000 |
| C  | -0.24724100 | 1.69247900  | -0.09580300 |
| C  | -0.69332100 | 3.05500800  | 0.24391600  |
| C  | -1.71336300 | 5.06650600  | -0.38896700 |
| H  | -0.94821800 | 5.66805600  | 0.10734000  |
| H  | -2.56753500 | 4.93849600  | 0.28013100  |
| H  | -2.02091000 | 5.52838700  | -1.32572700 |

Rh-cata

O 1

|    |             |             |             |
|----|-------------|-------------|-------------|
| Rh | 0.00001100  | 0.00000000  | 1.19218600  |
| C  | 1.86277000  | -1.85366800 | 0.00000200  |
| O  | 1.44691000  | -1.44749400 | 1.13477800  |
| C  | 1.86300600  | 1.85343200  | 0.00024100  |
| O  | 1.44705500  | 1.44734100  | -1.13455200 |
| C  | -1.86277700 | 1.85367400  | 0.00010300  |
| O  | -1.44778100 | 1.44665500  | -1.13466500 |
| C  | -1.86300500 | -1.85344500 | 0.00033200  |
| O  | -1.44798700 | -1.44637800 | 1.13504500  |
| Rh | -0.00002500 | 0.00000000  | -1.19201300 |
| O  | -1.44709800 | -1.44734900 | -1.13447900 |
| O  | 1.44801100  | 1.44638200  | 1.13497200  |
| O  | -1.44689000 | 1.44748700  | 1.13486000  |
| O  | 1.44773200  | -1.44664900 | -1.13474700 |
| C  | 2.96598000  | -2.88203500 | 0.00025200  |

|   |             |             |             |
|---|-------------|-------------|-------------|
| H | 2.90448800  | -3.50145000 | 0.89618600  |
| H | 2.91283500  | -3.49345000 | -0.90163300 |
| H | 3.92905200  | -2.36030700 | 0.00747000  |
| C | -2.96611100 | -2.88192500 | -0.00084000 |
| H | -2.93066400 | -3.47622100 | 0.91314200  |
| H | -3.92878700 | -2.36081000 | -0.03871300 |
| H | -2.88701600 | -3.51816600 | -0.88365000 |
| C | -2.96592700 | 2.88210600  | 0.00027000  |
| H | -3.92905000 | 2.36043900  | 0.00347800  |
| H | -2.90667400 | 3.49929000  | 0.89787700  |
| H | -2.91041900 | 3.49577600  | -0.89995800 |
| C | 2.96615700  | 2.88186300  | -0.00086000 |
| H | 2.92870800  | 3.47815100  | 0.91175900  |
| H | 3.92889200  | 2.36061300  | -0.03523000 |
| H | 2.88907300  | 3.51617200  | -0.88522100 |

1a-smd

O 1

|    |             |             |             |
|----|-------------|-------------|-------------|
| Br | 5.34124300  | -0.03631700 | -0.31573000 |
| O  | -1.37660600 | 2.18747500  | -0.00648300 |
| N  | -1.29899800 | -1.10440900 | 1.12458300  |
| C  | 1.36316200  | 1.17822600  | 0.08854000  |
| H  | 0.82361700  | 2.11404600  | 0.05582200  |
| O  | -3.18973900 | -1.53548300 | -0.78333600 |
| N  | -1.70683700 | -2.01565000 | 1.66441300  |
| C  | 2.74280700  | 1.17178600  | -0.10922700 |
| H  | 3.26436400  | 2.10405500  | -0.29547800 |
| O  | -5.15217800 | -0.43277500 | -0.48671500 |
| N  | -3.98355900 | 1.73664500  | 0.20427800  |
| C  | 3.44190400  | -0.03089900 | -0.05540000 |
| N  | -4.63408000 | 2.64753400  | 0.35020000  |
| C  | 2.77941400  | -1.23270100 | 0.18732500  |
| H  | 3.32521500  | -2.16885400 | 0.22094400  |
| C  | 1.40084800  | -1.22233100 | 0.37338500  |
| H  | 0.89786400  | -2.17012200 | 0.53874600  |
| C  | 0.66894100  | -0.02046700 | 0.33094500  |
| C  | -0.79793400 | -0.04109200 | 0.52776900  |
| C  | -1.74128700 | 1.02441600  | 0.17328700  |
| C  | -3.18876900 | 0.68911800  | 0.05821500  |
| C  | -3.81130800 | -0.54626200 | -0.44235600 |
| C  | -5.85900200 | -1.57954900 | -1.00915400 |
| H  | -5.66774900 | -2.45981100 | -0.39061300 |
| H  | -5.55284800 | -1.78252200 | -2.03836300 |
| H  | -6.91412300 | -1.30974500 | -0.97252900 |

## 1-int2-smd

O 1

|    |             |             |             |
|----|-------------|-------------|-------------|
| Rh | 1.40291900  | -2.99572400 | 0.16104700  |
| C  | 2.15341400  | -0.99556800 | 2.13347000  |
| O  | 2.44572300  | -2.16485500 | 1.73277600  |
| C  | -0.98375700 | -2.98023600 | 1.75964500  |
| O  | -1.19027400 | -1.80437300 | 1.30353900  |
| C  | -0.58671200 | -2.88501100 | -1.95708100 |
| O  | -0.83510900 | -1.68409400 | -1.59035600 |
| C  | 2.58115600  | -1.01089700 | -1.57746600 |
| O  | 2.75514100  | -2.19837800 | -1.16346700 |
| Rh | 0.15260000  | -0.89291300 | 0.03302100  |
| O  | 1.61375900  | -0.24309800 | -1.24388300 |
| O  | 0.01023300  | -3.71870000 | 1.48021700  |
| O  | 0.25842800  | -3.66551300 | -1.42179200 |
| O  | 1.24100300  | -0.24260300 | 1.64613300  |
| C  | 2.96185400  | -0.41485200 | 3.26301900  |
| H  | 3.71987700  | 0.25120800  | 2.83727300  |
| H  | 2.32213400  | 0.17702600  | 3.92105200  |
| H  | 3.45972300  | -1.20701800 | 3.82397000  |
| C  | 3.60155400  | -0.42919300 | -2.51716300 |
| H  | 4.16469100  | -1.22522100 | -3.00652500 |
| H  | 3.11406900  | 0.20716200  | -3.25836200 |
| H  | 4.29572900  | 0.19145100  | -1.94072100 |
| C  | -1.39252200 | -3.39427400 | -3.12299300 |
| H  | -1.31366000 | -2.68975000 | -3.95582500 |
| H  | -1.04689900 | -4.38109200 | -3.43264500 |
| H  | -2.44622800 | -3.44849100 | -2.83058100 |
| C  | -2.03035600 | -3.51290900 | 2.70132400  |
| H  | -2.98185800 | -3.59699900 | 2.16669100  |
| H  | -1.73797000 | -4.48897200 | 3.08980600  |
| H  | -2.17333800 | -2.80603200 | 3.52352800  |
| Br | 5.52521500  | 2.58758600  | -0.67144100 |
| O  | -1.59134100 | 1.21562300  | 2.17658300  |
| C  | 2.05124800  | 2.89245900  | 1.61813100  |
| H  | 1.80340900  | 2.92198300  | 2.67521100  |
| O  | -1.49968800 | 1.58256600  | -2.08836800 |
| C  | 3.38649500  | 2.78415400  | 1.23193800  |
| H  | 4.17361900  | 2.73958800  | 1.97615100  |
| O  | -2.99536500 | 0.21670200  | -1.04600600 |
| C  | 3.69011900  | 2.74600800  | -0.12849000 |
| C  | 2.69482500  | 2.81889300  | -1.10071000 |
| H  | 2.94678000  | 2.78518900  | -2.15417800 |

|   |             |             |             |
|---|-------------|-------------|-------------|
| C | 1.36338700  | 2.92178900  | -0.69916400 |
| H | 0.57579500  | 2.95715500  | -1.44379800 |
| C | 1.03493900  | 2.96360200  | 0.66027300  |
| C | -0.41008800 | 3.04144100  | 1.09768000  |
| C | -1.04573400 | 1.63302400  | 1.16387200  |
| C | -0.96850000 | 0.71660800  | 0.01056500  |
| C | -1.86747300 | 0.90181700  | -1.14543700 |
| C | -3.84161800 | 0.19089300  | -2.22130000 |
| H | -3.34380900 | -0.37473600 | -3.01278300 |
| H | -4.05883500 | 1.20357700  | -2.56265500 |
| H | -4.75525600 | -0.30717100 | -1.90373700 |
| C | -4.25369700 | 2.64611500  | 0.89160600  |
| C | -3.52517000 | 3.47883100  | 0.13262800  |
| H | -3.99164500 | 2.54404800  | 1.94435200  |
| H | -3.70352000 | 3.55043500  | -0.93889700 |
| C | -2.41148000 | 4.32723500  | 0.67180200  |
| H | -2.50748700 | 5.35698900  | 0.30985300  |
| H | -2.43049700 | 4.35074600  | 1.76922700  |
| O | -1.11231700 | 3.89250500  | 0.20898400  |
| H | -0.47382500 | 3.41092900  | 2.13218200  |
| C | -5.35073100 | 1.78760400  | 0.41906400  |
| C | -5.57871000 | 0.55382400  | 1.05435900  |
| C | -6.17125500 | 2.14628300  | -0.66508600 |
| C | -6.57412500 | -0.31017500 | 0.59949700  |
| H | -4.95130800 | 0.26653200  | 1.89405000  |
| C | -7.17296400 | 1.28631800  | -1.11428700 |
| H | -6.03160500 | 3.11027900  | -1.14577400 |
| C | -7.37484000 | 0.05237600  | -0.48839800 |
| H | -6.72750000 | -1.26462300 | 1.09553800  |
| H | -7.80170700 | 1.58162900  | -1.94981800 |
| H | -8.15684500 | -0.61589400 | -0.83790900 |

1-int3-smd

O 1

|    |             |             |             |
|----|-------------|-------------|-------------|
| Rh | 1.40291900  | -2.99572400 | 0.16104700  |
| C  | 2.15341400  | -0.99556800 | 2.13347000  |
| O  | 2.44572300  | -2.16485500 | 1.73277600  |
| C  | -0.98375700 | -2.98023600 | 1.75964500  |
| O  | -1.19027400 | -1.80437300 | 1.30353900  |
| C  | -0.58671200 | -2.88501100 | -1.95708100 |
| O  | -0.83510900 | -1.68409400 | -1.59035600 |
| C  | 2.58115600  | -1.01089700 | -1.57746600 |
| O  | 2.75514100  | -2.19837800 | -1.16346700 |
| Rh | 0.15260000  | -0.89291300 | 0.03302100  |

|    |             |             |             |
|----|-------------|-------------|-------------|
| O  | 1.61375900  | -0.24309800 | -1.24388300 |
| O  | 0.01023300  | -3.71870000 | 1.48021700  |
| O  | 0.25842800  | -3.66551300 | -1.42179200 |
| O  | 1.24100300  | -0.24260300 | 1.64613300  |
| C  | 2.96185400  | -0.41485200 | 3.26301900  |
| H  | 3.71987700  | 0.25120800  | 2.83727300  |
| H  | 2.32213400  | 0.17702600  | 3.92105200  |
| H  | 3.45972300  | -1.20701800 | 3.82397000  |
| C  | 3.60155400  | -0.42919300 | -2.51716300 |
| H  | 4.16469100  | -1.22522100 | -3.00652500 |
| H  | 3.11406900  | 0.20716200  | -3.25836200 |
| H  | 4.29572900  | 0.19145100  | -1.94072100 |
| C  | -1.39252200 | -3.39427400 | -3.12299300 |
| H  | -1.31366000 | -2.68975000 | -3.95582500 |
| H  | -1.04689900 | -4.38109200 | -3.43264500 |
| H  | -2.44622800 | -3.44849100 | -2.83058100 |
| C  | -2.03035600 | -3.51290900 | 2.70132400  |
| H  | -2.98185800 | -3.59699900 | 2.16669100  |
| H  | -1.73797000 | -4.48897200 | 3.08980600  |
| H  | -2.17333800 | -2.80603200 | 3.52352800  |
| Br | 5.52521500  | 2.58758600  | -0.67144100 |
| O  | -1.59134100 | 1.21562300  | 2.17658300  |
| C  | 2.05124800  | 2.89245900  | 1.61813100  |
| H  | 1.80340900  | 2.92198300  | 2.67521100  |
| O  | -1.49968800 | 1.58256600  | -2.08836800 |
| C  | 3.38649500  | 2.78415400  | 1.23193800  |
| H  | 4.17361900  | 2.73958800  | 1.97615100  |
| O  | -2.99536500 | 0.21670200  | -1.04600600 |
| C  | 3.69011900  | 2.74600800  | -0.12849000 |
| C  | 2.69482500  | 2.81889300  | -1.10071000 |
| H  | 2.94678000  | 2.78518900  | -2.15417800 |
| C  | 1.36338700  | 2.92178900  | -0.69916400 |
| H  | 0.57579500  | 2.95715500  | -1.44379800 |
| C  | 1.03493900  | 2.96360200  | 0.66027300  |
| C  | -0.41008800 | 3.04144100  | 1.09768000  |
| C  | -1.04573400 | 1.63302400  | 1.16387200  |
| C  | -0.96850000 | 0.71660800  | 0.01056500  |
| C  | -1.86747300 | 0.90181700  | -1.14543700 |
| C  | -3.84161800 | 0.19089300  | -2.22130000 |
| H  | -3.34380900 | -0.37473600 | -3.01278300 |
| H  | -4.05883500 | 1.20357700  | -2.56265500 |
| H  | -4.75525600 | -0.30717100 | -1.90373700 |
| C  | -4.25369700 | 2.64611500  | 0.89160600  |
| C  | -3.52517000 | 3.47883100  | 0.13262800  |

|   |             |             |             |
|---|-------------|-------------|-------------|
| H | -3.99164500 | 2.54404800  | 1.94435200  |
| H | -3.70352000 | 3.55043500  | -0.93889700 |
| C | -2.41148000 | 4.32723500  | 0.67180200  |
| H | -2.50748700 | 5.35698900  | 0.30985300  |
| H | -2.43049700 | 4.35074600  | 1.76922700  |
| O | -1.11231700 | 3.89250500  | 0.20898400  |
| H | -0.47382500 | 3.41092900  | 2.13218200  |
| C | -5.35073100 | 1.78760400  | 0.41906400  |
| C | -5.57871000 | 0.55382400  | 1.05435900  |
| C | -6.17125500 | 2.14628300  | -0.66508600 |
| C | -6.57412500 | -0.31017500 | 0.59949700  |
| H | -4.95130800 | 0.26653200  | 1.89405000  |
| C | -7.17296400 | 1.28631800  | -1.11428700 |
| H | -6.03160500 | 3.11027900  | -1.14577400 |
| C | -7.37484000 | 0.05237600  | -0.48839800 |
| H | -6.72750000 | -1.26462300 | 1.09553800  |
| H | -7.80170700 | 1.58162900  | -1.94981800 |
| H | -8.15684500 | -0.61589400 | -0.83790900 |

#### 1-int4-smd

O 1

|    |            |             |             |
|----|------------|-------------|-------------|
| Rh | 3.42741900 | -1.82277800 | -0.33595800 |
| C  | 3.07915500 | 0.87902400  | -1.66081800 |
| O  | 3.81122700 | -0.10281100 | -1.53382300 |
| C  | 3.21687300 | -0.24664500 | 2.09596900  |
| O  | 1.98235700 | -0.07341100 | 1.82147900  |
| C  | 1.52095400 | -3.40166700 | 1.15368900  |
| O  | 0.64843700 | -2.49381900 | 0.92533300  |
| C  | 1.48472400 | -2.39489100 | -2.39129600 |
| O  | 2.65987600 | -2.71879200 | -2.01895200 |
| Rh | 1.21807200 | -0.77428700 | 0.02686200  |
| O  | 0.71102900 | -1.56725400 | -1.80815500 |
| O  | 4.06335300 | -0.86982400 | 1.38062300  |
| O  | 2.74109800 | -3.38368700 | 0.79125200  |
| O  | 1.99103300 | 0.98260800  | -0.85164000 |
| C  | 3.35432600 | 1.93378600  | -2.67953400 |
| H  | 2.43399400 | 2.29656700  | -3.14079200 |
| H  | 3.85668900 | 2.78110300  | -2.20411000 |
| H  | 4.01428300 | 1.50706200  | -3.43523800 |
| C  | 0.93565800 | -3.06671600 | -3.62427400 |
| H  | 1.74088100 | -3.47678300 | -4.23588400 |
| H  | 0.27857300 | -3.88459200 | -3.30756100 |
| H  | 0.33314900 | -2.36205500 | -4.20168900 |
| C  | 1.03739800 | -4.59050100 | 1.94191900  |

|    |             |             |             |
|----|-------------|-------------|-------------|
| H  | 1.79366200  | -5.37598100 | 1.96025600  |
| H  | 0.81452200  | -4.27146800 | 2.96557000  |
| H  | 0.10931600  | -4.96813400 | 1.50452800  |
| C  | 3.70607300  | 0.32515900  | 3.40335300  |
| H  | 3.70267200  | -0.47356900 | 4.15403200  |
| H  | 4.73227800  | 0.68475700  | 3.30003200  |
| H  | 3.05052100  | 1.12678300  | 3.74720900  |
| Br | -8.33278200 | -0.66460600 | -0.09368700 |
| O  | -1.63845000 | -0.06596400 | -1.88111400 |
| C  | -4.65308800 | 0.60871400  | -1.60055400 |
| H  | -4.14461000 | 0.59311600  | -2.55877900 |
| O  | -2.11682300 | -0.86474800 | 1.43341200  |
| C  | -5.93133400 | 0.06273300  | -1.49239200 |
| H  | -6.42099700 | -0.36422500 | -2.36043700 |
| O  | -0.77505000 | 0.50674200  | 2.62709400  |
| C  | -6.56955300 | 0.07847600  | -0.25296000 |
| C  | -5.95341400 | 0.62360300  | 0.87134200  |
| H  | -6.45957600 | 0.62697800  | 1.83034700  |
| C  | -4.67075900 | 1.15921800  | 0.75003900  |
| H  | -4.17927200 | 1.57805300  | 1.61972700  |
| C  | -4.01301800 | 1.16004900  | -0.48372100 |
| C  | -2.61458100 | 1.72332000  | -0.62502100 |
| C  | -1.57473900 | 0.58000700  | -0.85698300 |
| C  | -0.54208800 | 0.49247900  | 0.25271400  |
| C  | -1.23246100 | -0.01762000 | 1.46392700  |
| C  | -1.33201900 | -0.06353700 | 3.82083400  |
| H  | -1.11449700 | -1.13406700 | 3.87856500  |
| H  | -2.41549300 | 0.08292500  | 3.85692700  |
| H  | -0.85387800 | 0.46165400  | 4.64923500  |
| C  | 1.11197800  | 2.21486900  | -0.71711400 |
| C  | 0.10668700  | 1.88814600  | 0.40316400  |
| H  | 0.60942000  | 2.31473500  | -1.68299600 |
| H  | 0.65352700  | 1.88742200  | 1.34484300  |
| C  | -0.97354400 | 3.02174600  | 0.44800300  |
| H  | -0.84317300 | 3.63706000  | 1.33933300  |
| H  | -0.90007700 | 3.68353400  | -0.42980200 |
| O  | -2.28803500 | 2.48698300  | 0.52478300  |
| H  | -2.56749900 | 2.35825800  | -1.52677700 |
| C  | 1.95908600  | 3.41699000  | -0.39609900 |
| C  | 1.82486100  | 4.59336500  | -1.14110100 |
| C  | 2.86369900  | 3.37265900  | 0.67522200  |
| C  | 2.58238600  | 5.72062000  | -0.81542700 |
| H  | 1.13160000  | 4.62515400  | -1.97728800 |
| C  | 3.63176100  | 4.49307600  | 0.98724900  |

|   |            |            |             |
|---|------------|------------|-------------|
| H | 2.96564100 | 2.46059900 | 1.25523100  |
| C | 3.48934600 | 5.67016100 | 0.24506700  |
| H | 2.46960500 | 6.63232900 | -1.39444200 |
| H | 4.33702700 | 4.45040500 | 1.81206100  |
| H | 4.08538300 | 6.54362800 | 0.49273800  |

1-int5-smd

0 1

|    |             |             |             |
|----|-------------|-------------|-------------|
| Rh | 2.47044500  | -2.48690500 | -0.41658900 |
| C  | 4.89963100  | -0.92955300 | -0.72708500 |
| O  | 4.44603100  | -2.11527800 | -0.84933600 |
| C  | 2.98629600  | -1.82690100 | 2.36426800  |
| O  | 2.73668200  | -0.61335000 | 2.06118100  |
| C  | -0.20167100 | -1.72711000 | 0.35323700  |
| O  | 0.27503600  | -0.56159800 | 0.54635500  |
| C  | 1.64666600  | -0.83867000 | -2.63972100 |
| O  | 1.92998700  | -2.04812200 | -2.34690600 |
| Rh | 2.23700500  | -0.16491600 | 0.12313100  |
| O  | 1.74976500  | 0.15324400  | -1.84796000 |
| O  | 2.96442100  | -2.81119200 | 1.55365100  |
| O  | 0.48444000  | -2.74862900 | 0.00564500  |
| O  | 4.22911400  | 0.08356100  | -0.33793000 |
| C  | 6.33784600  | -0.69290300 | -1.10453200 |
| H  | 6.36800200  | -0.30340300 | -2.12856900 |
| H  | 6.78297200  | 0.05449500  | -0.44418700 |
| H  | 6.90565400  | -1.62379800 | -1.06690100 |
| C  | 1.10925300  | -0.55898400 | -4.01646200 |
| H  | 1.34322100  | -1.37520400 | -4.70130700 |
| H  | 0.02106200  | -0.45805600 | -3.93587000 |
| H  | 1.50816000  | 0.38529800  | -4.39426000 |
| C  | -1.68466600 | -1.91040200 | 0.50896100  |
| H  | -1.91394900 | -2.93174100 | 0.81881200  |
| H  | -2.08975200 | -1.18020400 | 1.20868300  |
| H  | -2.14850600 | -1.72832400 | -0.46663900 |
| C  | 3.30026000  | -2.13155400 | 3.80467600  |
| H  | 2.38716800  | -2.49248500 | 4.29162700  |
| H  | 4.05115500  | -2.92205200 | 3.86741400  |
| H  | 3.64399500  | -1.23499400 | 4.32272700  |
| Br | -7.17905200 | -2.35461600 | 0.70810500  |
| O  | -1.52237800 | 0.58411700  | -1.64989800 |
| C  | -4.62768600 | -0.13367100 | -1.73769400 |
| H  | -4.16299200 | -0.25669400 | -2.71098900 |
| O  | -2.07125400 | 1.10818600  | 1.66053900  |
| C  | -5.45523400 | -1.14106700 | -1.24171000 |



|   |             |             |             |
|---|-------------|-------------|-------------|
| H | -5.64219400 | -2.03579800 | -1.82480600 |
| O | -0.01172600 | 2.00189600  | 1.88573400  |
| C | -6.04013300 | -0.97514200 | 0.01326900  |
| C | -5.81549300 | 0.17166200  | 0.77295100  |
| H | -6.27564400 | 0.28566900  | 1.74805800  |
| C | -4.97922400 | 1.16692500  | 0.26755500  |
| H | -4.77989800 | 2.05575700  | 0.85349800  |
| C | -4.38432300 | 1.02328700  | -0.98944400 |
| C | -3.40475300 | 2.06055800  | -1.50118300 |
| C | -1.97623400 | 1.58493100  | -1.13341600 |
| C | -1.21018000 | 2.41991800  | -0.12638000 |
| C | -1.14051100 | 1.75777300  | 1.21743100  |
| C | 0.11485200  | 1.35473800  | 3.16834700  |
| H | 0.11547900  | 0.27179200  | 3.03250500  |
| H | -0.70345800 | 1.64914800  | 3.83080400  |
| H | 1.07170800  | 1.68987500  | 3.56699800  |
| C | -0.20421000 | 3.42769600  | -0.70368200 |
| C | -1.52041300 | 3.91177900  | -0.16723400 |
| H | -0.15886300 | 3.36195900  | -1.79001100 |
| H | -1.52112300 | 4.41089000  | 0.79718800  |
| C | -2.66000200 | 4.27162400  | -1.10491700 |
| H | -3.07820400 | 5.24947000  | -0.85686900 |
| H | -2.32006500 | 4.30236300  | -2.15160500 |
| O | -3.73155600 | 3.33227500  | -0.96427900 |
| H | -3.43423500 | 2.09136000  | -2.60320300 |
| C | 1.12971800  | 3.71847800  | -0.09032200 |
| C | 2.25937600  | 3.08396900  | -0.63036800 |
| C | 1.30069900  | 4.59463600  | 0.98763200  |
| C | 3.52506700  | 3.28289900  | -0.07266900 |
| H | 2.14051100  | 2.41835600  | -1.47868400 |
| C | 2.56693100  | 4.80566000  | 1.53687500  |
| H | 0.44442100  | 5.10936900  | 1.41159500  |
| C | 3.68231000  | 4.14382800  | 1.01660100  |
| H | 4.37733500  | 2.75195400  | -0.48431600 |
| H | 2.68104200  | 5.48879700  | 2.37421100  |
| H | 4.66505400  | 4.30241600  | 1.45178300  |

1-TS2-smd

|     |             |             |             |
|-----|-------------|-------------|-------------|
| O 1 |             |             |             |
| Rh  | -0.71646100 | -0.76912300 | 0.08634400  |
| C   | 0.12269300  | -2.50758700 | -2.08319800 |
| O   | 0.58239100  | -1.71635300 | -1.19192900 |
| C   | -1.51949400 | 0.81200900  | -2.24676600 |
| O   | -2.34017500 | -0.11207000 | -2.53335500 |

|    |             |             |             |
|----|-------------|-------------|-------------|
| C  | -3.40739600 | -0.01663200 | 0.93965400  |
| O  | -3.84904000 | -0.63957600 | -0.07722600 |
| C  | -1.75804300 | -3.30969800 | 1.04350700  |
| O  | -0.81629500 | -2.46899500 | 1.23854500  |
| Rh | -2.52632700 | -1.70245600 | -1.23805900 |
| O  | -2.62345300 | -3.24643500 | 0.11374100  |
| O  | -0.78597300 | 0.84983800  | -1.19876400 |
| O  | -2.17741200 | 0.07493900  | 1.27522600  |
| O  | -1.10841900 | -2.72297500 | -2.32174800 |
| C  | 1.13884400  | -3.26492900 | -2.89441600 |
| H  | 1.53449700  | -4.07766300 | -2.27683300 |
| H  | 0.68349400  | -3.68449400 | -3.79227000 |
| H  | 1.96866100  | -2.60574000 | -3.15804900 |
| C  | -1.84743600 | -4.45443500 | 2.01658300  |
| H  | -0.86456300 | -4.91716100 | 2.13547500  |
| H  | -2.14776700 | -4.06175500 | 2.99381100  |
| H  | -2.57529800 | -5.19364900 | 1.68027200  |
| C  | -4.39689100 | 0.68775600  | 1.82755300  |
| H  | -4.19151800 | 0.44028100  | 2.87237400  |
| H  | -4.27012900 | 1.76800900  | 1.70795500  |
| H  | -5.41819200 | 0.40987200  | 1.56484100  |
| C  | -1.37350400 | 1.96196000  | -3.20733300 |
| H  | -0.40816200 | 1.86984100  | -3.71749700 |
| H  | -2.17347100 | 1.95345200  | -3.94859600 |
| H  | -1.37392800 | 2.90718400  | -2.65923000 |
| Br | 5.82751500  | 3.38877900  | -0.92895800 |
| O  | 1.10954400  | -1.38777100 | 3.31311200  |
| C  | 3.45667500  | 1.00521700  | 1.52936500  |
| H  | 3.54870700  | 0.54822900  | 2.51070800  |
| O  | 3.57457400  | -1.44487800 | -0.29985800 |
| C  | 4.51080500  | 1.76325200  | 1.03216300  |
| H  | 5.41829000  | 1.89320700  | 1.61075900  |
| O  | 3.22981400  | -3.67610700 | -0.11277000 |
| N  | 1.95440300  | -3.47419600 | 2.04833600  |
| C  | 4.37990800  | 2.34800400  | -0.22871200 |
| N  | 1.71605500  | -4.44157400 | 2.57999800  |
| C  | 3.21858200  | 2.19727700  | -0.98335800 |
| H  | 3.13171100  | 2.66289100  | -1.95874500 |
| C  | 2.16585300  | 1.44125100  | -0.46860100 |
| H  | 1.25953700  | 1.32137000  | -1.04668300 |
| C  | 2.27723100  | 0.82802800  | 0.78392100  |
| C  | 1.17771000  | 0.04394500  | 1.39673600  |
| C  | 1.51147900  | -1.19849700 | 2.17108600  |
| C  | 2.20539300  | -2.31359400 | 1.46520500  |

|   |             |             |             |
|---|-------------|-------------|-------------|
| C | 3.05217600  | -2.38425400 | 0.26105000  |
| C | 4.22447400  | -3.89003700 | -1.13489100 |
| H | 5.21261000  | -3.59643300 | -0.76899000 |
| H | 3.98946200  | -3.32047700 | -2.03555900 |
| H | 4.20258300  | -4.95981400 | -1.34365800 |
| C | -1.61912200 | 3.68781900  | 1.82889300  |
| C | -0.58262500 | 2.92252400  | 1.45564800  |
| H | -1.67371700 | 4.02994500  | 2.86299100  |
| H | -0.48175200 | 2.59078800  | 0.42498200  |
| C | 0.47020700  | 2.44199900  | 2.39944200  |
| H | 1.47527500  | 2.73830400  | 2.08658200  |
| H | 0.30281400  | 2.80404900  | 3.41755000  |
| O | 0.43321300  | 0.98504400  | 2.55525800  |
| H | -0.05871100 | 0.44864900  | 1.57057200  |
| C | -2.71580100 | 4.12566600  | 0.95069800  |
| C | -3.49003000 | 5.24714200  | 1.29572900  |
| C | -3.04322400 | 3.42519700  | -0.22707700 |
| C | -4.53537400 | 5.67442000  | 0.47526400  |
| H | -3.26327700 | 5.78997800  | 2.21019900  |
| C | -4.08745800 | 3.85032000  | -1.04472300 |
| H | -2.49037600 | 2.52873900  | -0.47964400 |
| C | -4.83599700 | 4.98087800  | -0.69958800 |
| H | -5.11784000 | 6.54781000  | 0.75531600  |
| H | -4.32475600 | 3.29109800  | -1.94586000 |
| H | -5.65288400 | 5.31037700  | -1.33531700 |

1-TS3-smd

O 1

|    |             |            |             |
|----|-------------|------------|-------------|
| Rh | 1.61993700  | 2.86867300 | -0.02027900 |
| C  | 2.04665800  | 0.97774000 | -2.17378000 |
| O  | 2.53922400  | 2.03329100 | -1.66077000 |
| C  | -0.74475400 | 3.30229400 | -1.61748600 |
| O  | -1.11696400 | 2.13622600 | -1.24837500 |
| C  | -0.37250300 | 2.89423100 | 2.09978000  |
| O  | -0.81404800 | 1.79018100 | 1.62961000  |
| C  | 2.48141500  | 0.63378700 | 1.58110200  |
| O  | 2.84236400  | 1.80317100 | 1.23001500  |
| Rh | 0.07651900  | 0.97357300 | -0.03818700 |
| O  | 1.42710800  | 0.03114000 | 1.19363200  |
| O  | 0.33348700  | 3.87483400 | -1.27027600 |
| O  | 0.58947600  | 3.57304500 | 1.62378600  |
| O  | 1.04421700  | 0.32595200 | -1.72914300 |
| C  | 2.70787000  | 0.46224800 | -3.42625900 |
| H  | 3.75722300  | 0.23920400 | -3.21276700 |

|    |             |             |             |
|----|-------------|-------------|-------------|
| H  | 2.20475500  | -0.42920800 | -3.79935300 |
| H  | 2.68567000  | 1.24622800  | -4.18952100 |
| C  | 3.39206400  | -0.10468700 | 2.52665700  |
| H  | 3.80558700  | 0.59278000  | 3.25883200  |
| H  | 2.85815700  | -0.91308100 | 3.02568500  |
| H  | 4.22473400  | -0.52826000 | 1.95606000  |
| C  | -1.04713100 | 3.40346500  | 3.34692500  |
| H  | -0.64652600 | 2.85504600  | 4.20709600  |
| H  | -0.85037600 | 4.46754500  | 3.48559400  |
| H  | -2.12221800 | 3.21580700  | 3.29800500  |
| C  | -1.67355000 | 4.02742400  | -2.55488500 |
| H  | -2.69200700 | 4.00107100  | -2.15795400 |
| H  | -1.35086200 | 5.05877000  | -2.70137300 |
| H  | -1.68039100 | 3.50539300  | -3.51757800 |
| Br | 5.68984000  | -2.45602600 | 0.14008200  |
| O  | -1.56005200 | -1.44059300 | -2.16880300 |
| C  | 1.90331700  | -2.55582100 | -1.60860000 |
| H  | 1.48413900  | -2.37675400 | -2.59323600 |
| O  | -0.81339700 | -1.66358500 | 2.10635800  |
| C  | 3.27620000  | -2.41846400 | -1.41618100 |
| H  | 3.92197800  | -2.13481700 | -2.23878700 |
| O  | -2.75750800 | -0.51778300 | 1.89413100  |
| N  | -2.86431000 | 0.12370100  | -0.54874100 |
| C  | 3.80134200  | -2.65961600 | -0.14782200 |
| N  | -3.51850400 | 0.94045300  | -0.90642900 |
| C  | 2.98721000  | -3.03974800 | 0.91628400  |
| H  | 3.41293900  | -3.23137000 | 1.89425800  |
| C  | 1.61179800  | -3.14906600 | 0.71298800  |
| H  | 0.96103800  | -3.41065400 | 1.53638000  |
| C  | 1.06251600  | -2.90922600 | -0.54805900 |
| C  | -0.42417200 | -3.05411900 | -0.80716000 |
| C  | -1.14303300 | -1.68534900 | -1.04705400 |
| C  | -1.26961300 | -0.66410700 | 0.03903000  |
| C  | -1.60513000 | -1.02361900 | 1.44469600  |
| C  | -2.99944100 | -0.67344100 | 3.30851400  |
| H  | -2.23139900 | -0.14594500 | 3.87960300  |
| H  | -3.00398900 | -1.73000700 | 3.58694700  |
| H  | -3.97702600 | -0.22631700 | 3.48496400  |
| C  | -4.24023300 | -2.92806200 | -0.70054400 |
| C  | -3.40983300 | -3.43597100 | 0.22347300  |
| H  | -4.10074700 | -3.23763200 | -1.73650600 |
| H  | -3.48299500 | -3.13667700 | 1.26643100  |
| C  | -2.29992900 | -4.39277800 | -0.09159500 |
| H  | -2.36606200 | -5.28495100 | 0.54092200  |

|   |             |             |             |
|---|-------------|-------------|-------------|
| H | -2.33949900 | -4.71587600 | -1.14126600 |
| O | -1.00797400 | -3.83299000 | 0.21220200  |
| H | -0.56101700 | -3.54128800 | -1.78430300 |
| C | -5.29735200 | -1.93106600 | -0.48382800 |
| C | -5.89956600 | -1.33212200 | -1.60485200 |
| C | -5.69368100 | -1.49780400 | 0.79675800  |
| C | -6.84684700 | -0.31916400 | -1.45703900 |
| H | -5.60364900 | -1.65358700 | -2.60026000 |
| C | -6.63998900 | -0.48751900 | 0.94432400  |
| H | -5.25794800 | -1.95128100 | 1.68083800  |
| C | -7.21760800 | 0.11106600  | -0.18105700 |
| H | -7.29267900 | 0.13535200  | -2.33723300 |
| H | -6.93151800 | -0.16541100 | 1.94033300  |
| H | -7.95410700 | 0.90057100  | -0.06245600 |

#### 1-TS4-smd

O 1

|    |             |             |             |
|----|-------------|-------------|-------------|
| Rh | 3.05767300  | -1.96072700 | -0.74085400 |
| C  | 0.57787200  | -2.33577300 | -2.17363200 |
| O  | 1.78778500  | -2.72742400 | -2.16462400 |
| C  | 2.78025800  | 0.60099000  | -2.08665500 |
| O  | 1.78219400  | 0.84075000  | -1.32897900 |
| C  | 3.70233600  | -0.27147200 | 1.53705700  |
| O  | 2.49887800  | 0.16144700  | 1.49064000  |
| C  | 1.47060300  | -3.16749800 | 1.35787100  |
| O  | 2.45215700  | -3.41193300 | 0.58966100  |
| Rh | 1.19920400  | -0.55691800 | 0.05700000  |
| O  | 0.77476200  | -2.09702900 | 1.36963200  |
| O  | 3.53406800  | -0.42166000 | -2.03170700 |
| O  | 4.21702100  | -1.12050600 | 0.74936700  |
| O  | 0.06009000  | -1.47925500 | -1.38243600 |
| C  | -0.34621800 | -2.90891300 | -3.21724900 |
| H  | -1.26834600 | -3.25402400 | -2.74179000 |
| H  | -0.61515600 | -2.11686300 | -3.92398500 |
| H  | 0.13339300  | -3.72921800 | -3.75279700 |
| C  | 1.08788100  | -4.21552300 | 2.37218100  |
| H  | 1.61421300  | -5.15133400 | 2.17985400  |
| H  | 1.35061000  | -3.85269100 | 3.37177400  |
| H  | 0.00698600  | -4.37698700 | 2.34852400  |
| C  | 4.58286200  | 0.32236400  | 2.60765000  |
| H  | 5.42461900  | -0.33789000 | 2.82181700  |
| H  | 4.97461800  | 1.28057200  | 2.24682200  |
| H  | 4.00507900  | 0.51222700  | 3.51475100  |
| C  | 3.07236700  | 1.60757600  | -3.16924700 |

|    |             |             |             |
|----|-------------|-------------|-------------|
| H  | 4.14719400  | 1.79465000  | -3.22625000 |
| H  | 2.75390500  | 1.18149700  | -4.12718200 |
| H  | 2.53459700  | 2.53803300  | -2.99395600 |
| Br | -8.04479000 | -0.62380100 | -0.84052900 |
| O  | -1.31466200 | 1.15856400  | -1.44365100 |
| C  | -4.41079800 | 1.40901500  | -1.14203600 |
| H  | -3.84951800 | 1.91137900  | -1.92304000 |
| O  | -1.96285900 | -0.90808400 | 1.68442800  |
| C  | -5.63841600 | 0.82264200  | -1.44749000 |
| H  | -6.03672600 | 0.87597100  | -2.45439800 |
| O  | -0.45330300 | 0.08377600  | 3.05309300  |
| C  | -6.34571000 | 0.17270400  | -0.43701100 |
| C  | -5.84525300 | 0.09359000  | 0.86090300  |
| H  | -6.40248700 | -0.42029800 | 1.63618100  |
| C  | -4.61255000 | 0.67907400  | 1.15094700  |
| H  | -4.20849700 | 0.61150700  | 2.15285500  |
| C  | -3.88988600 | 1.34351800  | 0.15587600  |
| C  | -2.54550000 | 1.98216100  | 0.45003800  |
| C  | -1.39499400 | 1.18603800  | -0.23200400 |
| C  | -0.40143700 | 0.52183500  | 0.69138300  |
| C  | -1.04131300 | -0.12763700 | 1.86991400  |
| C  | -0.98825700 | -0.68246200 | 4.15093200  |
| H  | -0.88907400 | -1.75176700 | 3.95204900  |
| H  | -2.04118400 | -0.43552600 | 4.31411400  |
| H  | -0.39482100 | -0.39975400 | 5.02067000  |
| C  | 0.52088300  | 3.35380500  | 0.52452300  |
| C  | 0.10379200  | 2.51747100  | 1.54957400  |
| H  | -0.26118900 | 3.94592800  | 0.04745200  |
| H  | 0.84459100  | 1.99728100  | 2.14857000  |
| C  | -1.22846400 | 2.87120600  | 2.21971900  |
| H  | -1.12901700 | 2.74227100  | 3.29876100  |
| H  | -1.46923600 | 3.92394500  | 2.01635700  |
| O  | -2.35062100 | 2.06630600  | 1.84894900  |
| H  | -2.52126200 | 2.98531500  | -0.00481700 |
| C  | 1.83896600  | 3.61505400  | 0.01803800  |
| C  | 1.97170600  | 4.53554000  | -1.04884300 |
| C  | 3.00698700  | 3.05186300  | 0.57991200  |
| C  | 3.22647700  | 4.87048200  | -1.54409400 |
| H  | 1.07873900  | 4.98056700  | -1.47965300 |
| C  | 4.25648100  | 3.37999800  | 0.07403900  |
| H  | 2.91391600  | 2.35090300  | 1.39671500  |
| C  | 4.37094000  | 4.28908600  | -0.98738400 |
| H  | 3.31712100  | 5.57815200  | -2.36228200 |
| H  | 5.14906400  | 2.93668000  | 0.50552800  |

|        |             |             |             |
|--------|-------------|-------------|-------------|
| H      | 5.35224700  | 4.54653600  | -1.37513300 |
| 2a-smd |             |             |             |
| 0 1    |             |             |             |
| C      | 0.82878600  | -0.61483800 | 0.20193500  |
| C      | 1.87902800  | 0.21879600  | 0.21407200  |
| H      | 1.02491900  | -1.68550000 | 0.27059100  |
| H      | 1.74562900  | 1.29510100  | 0.11798900  |
| C      | 3.29857500  | -0.22688300 | 0.37568800  |
| H      | 3.67370400  | 0.11102200  | 1.35719400  |
| H      | 3.35776500  | -1.32693700 | 0.36879700  |
| O      | 4.07762800  | 0.34885700  | -0.67844500 |
| H      | 5.00967000  | 0.21675400  | -0.45329900 |
| C      | -0.59350700 | -0.25272400 | 0.09532800  |
| C      | -1.54558400 | -1.27642200 | -0.06291100 |
| C      | -1.05562400 | 1.07701300  | 0.14432900  |
| C      | -2.90501200 | -0.98695500 | -0.18067600 |
| H      | -1.21037200 | -2.31015100 | -0.09817700 |
| C      | -2.41224000 | 1.36643900  | 0.02533900  |
| H      | -0.35007500 | 1.89003600  | 0.28502100  |
| C      | -3.34507700 | 0.33696000  | -0.13890400 |
| H      | -3.61975100 | -1.79583800 | -0.30422400 |
| H      | -2.74562800 | 2.39975500  | 0.06651500  |
| H      | -4.40296600 | 0.56658700  | -0.22804900 |

2-int2-smd

|     |             |             |             |
|-----|-------------|-------------|-------------|
| 0 1 |             |             |             |
| Rh  | -0.72837100 | -0.14303000 | -0.08527100 |
| C   | 0.23994000  | -1.84759000 | 2.05958900  |
| O   | 0.48376900  | -0.74573800 | 1.46415500  |
| C   | 0.10320700  | -2.47713600 | -1.58941700 |
| O   | -0.84035300 | -3.12133500 | -1.02787100 |
| C   | -3.05526000 | -0.45111200 | -1.82092600 |
| O   | -3.30120500 | -1.54631900 | -1.22268600 |
| C   | -2.92318200 | 0.20421900  | 1.80585500  |
| O   | -1.96182600 | 0.84185000  | 1.25234700  |
| Rh  | -2.06200100 | -2.14797900 | 0.31437300  |
| O   | -3.20019100 | -1.02145600 | 1.62870400  |
| O   | 0.38463200  | -1.24600200 | -1.40351100 |
| O   | -2.08176400 | 0.33605400  | -1.57234200 |
| O   | -0.73673700 | -2.62625100 | 1.81859100  |
| C   | 1.22599100  | -2.27424900 | 3.11693700  |
| H   | 0.74579800  | -2.92178200 | 3.85275800  |
| H   | 2.03070900  | -2.83748100 | 2.63049200  |
| H   | 1.66864100  | -1.40210500 | 3.60196300  |

|    |             |             |             |
|----|-------------|-------------|-------------|
| C  | -3.77402200 | 0.97928700  | 2.78078200  |
| H  | -3.75701800 | 2.04487600  | 2.54382100  |
| H  | -4.79909500 | 0.60380200  | 2.77339100  |
| H  | -3.36770600 | 0.83963600  | 3.78911300  |
| C  | -3.96913300 | -0.04216800 | -2.94851200 |
| H  | -4.12878100 | 1.03895700  | -2.93063100 |
| H  | -3.48353800 | -0.29220500 | -3.89847600 |
| H  | -4.92196000 | -0.57003600 | -2.88841300 |
| C  | 0.97483800  | -3.21476300 | -2.57333500 |
| H  | 2.02523100  | -3.08478800 | -2.29723900 |
| H  | 0.72209700  | -4.27534400 | -2.60022700 |
| H  | 0.83822700  | -2.77914700 | -3.56850600 |
| Br | 6.48753700  | -0.20314000 | 0.00947400  |
| O  | 0.15877100  | 2.06431800  | -2.69071400 |
| C  | 2.67893000  | 0.79873800  | -1.38764900 |
| H  | 2.14832300  | 0.75395000  | -2.32990200 |
| O  | 0.19719400  | 2.51595600  | 0.82696200  |
| C  | 3.99854500  | 0.35967400  | -1.31580700 |
| H  | 4.49427800  | -0.01680200 | -2.20386200 |
| O  | -1.49086600 | 3.93189600  | 1.36398100  |
| N  | -2.09256700 | 3.67316500  | -1.52730300 |
| C  | 4.67057000  | 0.40682500  | -0.09496100 |
| N  | -2.94587500 | 4.01771800  | -2.18031400 |
| C  | 4.04389900  | 0.89197800  | 1.05140100  |
| H  | 4.57337500  | 0.92486200  | 1.99733400  |
| C  | 2.72320900  | 1.32841400  | 0.97248700  |
| H  | 2.23164800  | 1.68606600  | 1.86947700  |
| C  | 2.02268400  | 1.29135400  | -0.24483600 |
| C  | 0.60484000  | 1.67417100  | -0.31980300 |
| C  | -0.02077000 | 2.27398000  | -1.50145600 |
| C  | -1.04748700 | 3.20097500  | -0.89515800 |
| C  | -0.81672200 | 3.25254200  | 0.49244100  |
| C  | -1.15686000 | 3.72974600  | 2.77513900  |
| H  | -0.16383400 | 4.13837600  | 2.97346900  |
| H  | -1.19609200 | 2.66333300  | 2.99913800  |
| H  | -1.91895700 | 4.28186500  | 3.32090600  |

2-int3-smd

O 1

|    |             |             |             |
|----|-------------|-------------|-------------|
| Br | -6.48756700 | -0.20310500 | 0.00946900  |
| O  | -0.15878700 | 2.06429100  | -2.69071700 |
| C  | -2.67896400 | 0.79878000  | -1.38765800 |
| H  | -2.14836700 | 0.75401800  | -2.32991600 |
| O  | -0.19721300 | 2.51596900  | 0.82695200  |



|    |             |             |             |
|----|-------------|-------------|-------------|
| C  | -3.99858200 | 0.35972400  | -1.31581600 |
| H  | -4.49432600 | -0.01672300 | -2.20387700 |
| O  | 1.49088900  | 3.93186600  | 1.36396200  |
| N  | 2.09266900  | 3.67297800  | -1.52727800 |
| C  | -4.67059700 | 0.40684800  | -0.09496400 |
| N  | 2.94605900  | 4.01740600  | -2.18024900 |
| C  | -4.04391300 | 0.89196400  | 1.05140700  |
| H  | -4.57338200 | 0.92482800  | 1.99734400  |
| C  | -2.72322100 | 1.32839200  | 0.97249400  |
| H  | -2.23164900 | 1.68601700  | 1.86948800  |
| C  | -2.02270600 | 1.29135900  | -0.24483600 |
| C  | -0.60486200 | 1.67417100  | -0.31980400 |
| C  | 0.02076000  | 2.27395700  | -1.50146200 |
| C  | 1.04750400  | 3.20092900  | -0.89516900 |
| C  | 0.81672900  | 3.25251900  | 0.49242800  |
| C  | 1.15688100  | 3.72972800  | 2.77512000  |
| H  | 1.19600200  | 2.66330700  | 2.99910400  |
| H  | 0.16390200  | 4.13846500  | 2.97346700  |
| H  | 1.91904500  | 4.28175500  | 3.32088600  |
| Rh | 0.72836200  | -0.14302600 | -0.08526500 |
| C  | -0.10329800 | -2.47720300 | -1.58925600 |
| O  | -0.38466600 | -1.24604000 | -1.40345100 |
| C  | -0.23982600 | -1.84753800 | 2.05968200  |
| O  | 0.73689500  | -2.62615100 | 1.81870600  |
| C  | 2.92327400  | 0.20431100  | 1.80572300  |
| O  | 3.20033200  | -1.02134600 | 1.62854000  |
| C  | 3.05514400  | -0.45116400 | -1.82106300 |
| O  | 2.08170900  | 0.33604700  | -1.57237100 |
| Rh | 2.06204100  | -2.14794600 | 0.31436500  |
| O  | 3.30111500  | -1.54637100 | -1.22283900 |
| O  | -0.48373900 | -0.74573500 | 1.46419300  |
| O  | 1.96183500  | 0.84189500  | 1.25230300  |
| O  | 0.84027900  | -3.12138100 | -1.02771800 |
| C  | -0.97507400 | -3.21491400 | -2.57298300 |
| H  | -2.02539800 | -3.08531700 | -2.29643200 |
| H  | -0.83901100 | -2.77907600 | -3.56812800 |
| H  | -0.72203700 | -4.27541700 | -2.60014400 |
| C  | 3.96887000  | -0.04219900 | -2.94875600 |
| H  | 4.12956000  | 1.03876400  | -2.93003100 |
| H  | 4.92122700  | -0.57101300 | -2.88958600 |
| H  | 3.48251500  | -0.29088500 | -3.89868500 |
| C  | 3.77416000  | 0.97941400  | 2.78058300  |
| H  | 4.79925000  | 0.60398000  | 2.77309700  |
| H  | 3.75708200  | 2.04500500  | 2.54363600  |

|   |             |             |            |
|---|-------------|-------------|------------|
| H | 3.36793900  | 0.83973300  | 3.78894800 |
| C | -1.22582600 | -2.27420800 | 3.11707500 |
| H | -1.66858700 | -1.40206900 | 3.60201000 |
| H | -2.03047000 | -2.83759700 | 2.63069100 |
| H | -0.74555000 | -2.92160100 | 3.85296500 |

2-TS1-smd

0 1

|    |             |             |             |
|----|-------------|-------------|-------------|
| Rh | 0.64571000  | -0.41333800 | 0.01630500  |
| C  | 0.55364500  | -2.14113700 | -2.32818500 |
| O  | -0.04204700 | -1.14989800 | -1.77752800 |
| C  | -0.11859200 | -2.91569600 | 1.28948000  |
| O  | 1.01436200  | -3.38415400 | 0.95063400  |
| C  | 2.49559500  | -0.45313600 | 2.28192700  |
| O  | 3.05103200  | -1.47054500 | 1.75922100  |
| C  | 3.13811300  | 0.34986100  | -1.27358800 |
| O  | 1.96713100  | 0.78832600  | -1.00091600 |
| Rh | 2.34563200  | -2.16475100 | -0.04167800 |
| O  | 3.57050400  | -0.81531600 | -1.01637100 |
| O  | -0.54807600 | -1.73884400 | 1.03820800  |
| O  | 1.50227500  | 0.18653600  | 1.79626200  |
| O  | 1.55164400  | -2.75917600 | -1.84864100 |
| C  | 0.01101400  | -2.58234200 | -3.66179300 |
| H  | 0.14040600  | -1.77069200 | -4.38519800 |
| H  | 0.52764300  | -3.47521700 | -4.01502400 |
| H  | -1.06165600 | -2.77871900 | -3.57501600 |
| C  | 4.06760500  | 1.32846700  | -1.94255600 |
| H  | 4.25954000  | 2.15646100  | -1.25316300 |
| H  | 5.00797500  | 0.84892700  | -2.21582000 |
| H  | 3.58415000  | 1.74097300  | -2.83263300 |
| C  | 3.06835100  | 0.07411400  | 3.57199800  |
| H  | 3.75700400  | 0.89423100  | 3.34140100  |
| H  | 2.27230600  | 0.46924100  | 4.20622600  |
| H  | 3.61991400  | -0.71017500 | 4.09284000  |
| C  | -1.03465500 | -3.80684000 | 2.08682600  |
| H  | -0.87232400 | -3.60488000 | 3.15180600  |
| H  | -2.07828900 | -3.58476600 | 1.85502500  |
| H  | -0.81172900 | -4.85753300 | 1.89380800  |
| Br | -6.95299000 | -0.02833300 | 0.02805200  |
| O  | -0.77326700 | 2.02683200  | 2.15588300  |
| N  | -0.68192300 | 1.68773000  | -1.63106400 |
| C  | -3.25811800 | 1.82372100  | 0.52231700  |
| H  | -2.90576900 | 2.77796800  | 0.89623500  |
| O  | 0.62670800  | 3.84510700  | -1.47281600 |

|   |             |             |             |
|---|-------------|-------------|-------------|
| N | -0.67330600 | 1.45635100  | -2.71674900 |
| C | -4.62310400 | 1.56357400  | 0.52098300  |
| H | -5.32406200 | 2.30616000  | 0.88425400  |
| O | 2.57004200  | 4.09255400  | -0.33407400 |
| N | 1.55915500  | 3.18300700  | 1.83088400  |
| C | -5.07670500 | 0.33421400  | 0.03695600  |
| N | 2.17469100  | 3.31043700  | 2.76819600  |
| C | -4.19174300 | -0.63083300 | -0.44394500 |
| H | -4.55955500 | -1.57847800 | -0.82065400 |
| C | -2.82635800 | -0.36181500 | -0.43130300 |
| H | -2.13437500 | -1.10233900 | -0.80842200 |
| C | -2.33749800 | 0.86262800  | 0.05925800  |
| C | -0.88011700 | 1.13384500  | 0.04553700  |
| C | -0.35281000 | 2.14618200  | 1.00297400  |
| C | 0.81742200  | 3.01376500  | 0.74801800  |
| C | 1.29994900  | 3.66518800  | -0.47421900 |
| C | 3.09069900  | 4.87127000  | -1.43332900 |
| H | 2.50710700  | 5.78686200  | -1.56060600 |
| H | 3.06951800  | 4.29252500  | -2.35915500 |
| H | 4.11751600  | 5.11087600  | -1.15781100 |

## 2-TS2-smd

|     |             |             |             |
|-----|-------------|-------------|-------------|
| O 1 |             |             |             |
| Rh  | -0.76838200 | -0.21385600 | -0.12992200 |
| C   | -0.99727700 | -1.37085500 | 2.55007600  |
| O   | -0.30038600 | -0.55576500 | 1.85532200  |
| C   | -0.10896700 | -2.99687000 | -0.66725600 |
| O   | -1.30555800 | -3.29552000 | -0.36284300 |
| C   | -2.41985400 | -0.69115300 | -2.48509100 |
| O   | -3.10736400 | -1.50582100 | -1.79391400 |
| C   | -3.29741700 | 0.97232600  | 0.73054700  |
| O   | -2.08698400 | 1.26659900  | 0.44185300  |
| Rh  | -2.61888600 | -1.80426400 | 0.18440700  |
| O   | -3.80208300 | -0.19147700 | 0.72080100  |
| O   | 0.39491100  | -1.82220900 | -0.67171700 |
| O   | -1.41834600 | -0.01462100 | -2.07116900 |
| O   | -2.01544700 | -2.01323800 | 2.14696500  |
| C   | -0.53536200 | -1.60474900 | 3.96656300  |
| H   | -1.35672100 | -1.97301900 | 4.58345800  |
| H   | 0.25695800  | -2.36218700 | 3.95302700  |
| H   | -0.11986600 | -0.68746100 | 4.38916700  |
| C   | -4.20225000 | 2.12569100  | 1.08486100  |
| H   | -3.61824500 | 3.00412600  | 1.36581300  |
| H   | -4.81207700 | 2.37320700  | 0.20860700  |

|    |             |             |             |
|----|-------------|-------------|-------------|
| H  | -4.87802100 | 1.84042400  | 1.89434300  |
| C  | -2.80005000 | -0.48795500 | -3.92969300 |
| H  | -3.02483600 | 0.56921000  | -4.10118000 |
| H  | -1.94910600 | -0.74954500 | -4.56610500 |
| H  | -3.66375100 | -1.09878300 | -4.19475300 |
| C  | 0.81786300  | -4.11349700 | -1.07566900 |
| H  | 1.76446000  | -4.02347000 | -0.53592700 |
| H  | 0.36301800  | -5.08601100 | -0.88329900 |
| H  | 1.03678900  | -4.02018800 | -2.14469700 |
| Br | 6.71445800  | -0.62283400 | 0.08702000  |
| O  | 0.56888700  | 2.11334700  | -2.56251200 |
| C  | 3.22007700  | 1.30387000  | -1.10526100 |
| H  | 2.95397300  | 2.04883700  | -1.84614700 |
| O  | 0.55998200  | 2.25846000  | 1.22099200  |
| C  | 4.54586500  | 0.89323200  | -1.01215500 |
| H  | 5.29983900  | 1.32095100  | -1.66320700 |
| O  | -0.77462700 | 4.06661000  | 1.54854400  |
| N  | -0.91747600 | 4.23743200  | -1.25976600 |
| C  | 4.89076500  | -0.06827700 | -0.06116900 |
| N  | -1.49174200 | 4.99952400  | -1.86551000 |
| C  | 3.93479200  | -0.63342700 | 0.78552900  |
| H  | 4.22150100  | -1.37624300 | 1.52141400  |
| C  | 2.60751700  | -0.24134100 | 0.66155000  |
| H  | 1.85438700  | -0.67411900 | 1.30699500  |
| C  | 2.22479300  | 0.73687100  | -0.28080200 |
| C  | 0.82173800  | 1.12722700  | -0.39405100 |
| C  | 0.43185300  | 2.20180700  | -1.34910600 |
| C  | -0.22149700 | 3.31781900  | -0.63696300 |
| C  | -0.13701200 | 3.20021300  | 0.79159400  |
| C  | -0.71270700 | 3.83347900  | 2.98396100  |
| H  | 0.31960200  | 3.91133400  | 3.33149700  |
| H  | -1.11569900 | 2.84493700  | 3.21307300  |
| H  | -1.32777600 | 4.61650000  | 3.42396900  |

## 2-TS3-smd

O 1

|    |            |             |             |
|----|------------|-------------|-------------|
| Rh | 2.94037200 | -0.34322800 | -0.20414700 |
| C  | 4.02906100 | 0.78082800  | 2.23997700  |
| O  | 2.93306600 | 0.62324000  | 1.61019900  |
| C  | 4.56581900 | 1.78428300  | -1.29683700 |
| O  | 5.58438300 | 1.13182900  | -0.88775500 |
| C  | 4.23796300 | -1.77458900 | -2.36975000 |
| O  | 5.33103600 | -1.63858300 | -1.72571500 |
| C  | 3.67228600 | -2.77089000 | 1.21772500  |

|    |             |             |             |
|----|-------------|-------------|-------------|
| O  | 2.65941700  | -2.11603800 | 0.79979500  |
| Rh | 5.30579000  | -0.65770100 | 0.07687900  |
| O  | 4.88734000  | -2.43496900 | 1.04423500  |
| O  | 3.35251400  | 1.42121500  | -1.16034800 |
| O  | 3.09863000  | -1.35123600 | -1.98801800 |
| O  | 5.16795300  | 0.34680700  | 1.86382500  |
| C  | 3.97443800  | 1.57517500  | 3.51777900  |
| H  | 4.82601900  | 1.33987000  | 4.15819100  |
| H  | 4.01020600  | 2.64017600  | 3.26157900  |
| H  | 3.03511500  | 1.38693700  | 4.04226100  |
| C  | 3.40427000  | -4.02668600 | 2.00412300  |
| H  | 2.36116400  | -4.33004400 | 1.90604300  |
| H  | 4.06719500  | -4.82728300 | 1.66710100  |
| H  | 3.62609600  | -3.83249600 | 3.05934300  |
| C  | 4.29733500  | -2.46292800 | -3.70721600 |
| H  | 3.40671300  | -3.07810600 | -3.85285400 |
| H  | 4.30748900  | -1.69643000 | -4.49040500 |
| H  | 5.20130600  | -3.06778400 | -3.79313500 |
| C  | 4.81411900  | 3.07637300  | -2.02734800 |
| H  | 4.00371200  | 3.78058500  | -1.82828100 |
| H  | 5.77593600  | 3.50316700  | -1.73823800 |
| H  | 4.83128100  | 2.86994200  | -3.10353900 |
| Br | 0.31786900  | 6.06985100  | 0.11538000  |
| O  | -0.17060600 | -0.83326600 | -2.35910000 |
| C  | 0.05417400  | 2.10693900  | -1.18876800 |
| H  | -0.00393200 | 1.58737300  | -2.13804900 |
| O  | 0.02958400  | -0.80116300 | 1.19501500  |
| C  | 0.12842600  | 3.49559200  | -1.15766600 |
| H  | 0.12406300  | 4.05856400  | -2.08468200 |
| O  | -0.07903100 | -2.94496000 | 1.94203500  |
| N  | -0.41620600 | -3.49538000 | -0.95619200 |
| C  | 0.21147700  | 4.15206500  | 0.07100000  |
| N  | -0.60981100 | -4.44144600 | -1.54164400 |
| C  | 0.21930300  | 3.43668700  | 1.26813800  |
| H  | 0.28360200  | 3.95453100  | 2.21901000  |
| C  | 0.14207200  | 2.04736600  | 1.23442000  |
| H  | 0.14984200  | 1.49117300  | 2.16401700  |
| C  | 0.06275200  | 1.36096300  | 0.00871800  |
| C  | -0.01818300 | -0.08148700 | -0.04891300 |
| C  | -0.13006700 | -1.00194200 | -1.13677500 |
| C  | -0.19704800 | -2.33462500 | -0.40189400 |
| C  | -0.08179800 | -2.08138300 | 0.97318000  |
| C  | 0.08847200  | -2.42017300 | 3.29270500  |
| H  | -0.72139300 | -1.72308400 | 3.51254800  |

|    |             |             |             |
|----|-------------|-------------|-------------|
| H  | 1.05870000  | -1.92520900 | 3.36934300  |
| H  | 0.04343400  | -3.29328400 | 3.94009200  |
| Rh | -2.95714800 | -0.25544700 | -0.17069900 |
| C  | -4.13741800 | 1.86888900  | 1.40789900  |
| O  | -3.01836000 | 1.44298500  | 0.97277600  |
| C  | -3.82640200 | -1.81185500 | 2.13022400  |
| O  | -5.01951800 | -1.54521200 | 1.77885100  |
| C  | -4.18001700 | -2.53421400 | -1.50088800 |
| O  | -5.29927000 | -2.11731100 | -1.05471000 |
| C  | -4.48684300 | 1.13050800  | -2.20644400 |
| O  | -3.29008600 | 0.87047700  | -1.85428200 |
| Rh | -5.34095100 | -0.40974200 | 0.09093400  |
| O  | -5.54020200 | 0.73148900  | -1.60531900 |
| O  | -2.77202100 | -1.40980900 | 1.53229800  |
| O  | -3.04915100 | -1.98250000 | -1.29338700 |
| O  | -5.26780900 | 1.30662100  | 1.21919600  |
| C  | -4.12028200 | 3.12633600  | 2.23559100  |
| H  | -3.22210700 | 3.70874100  | 2.02472600  |
| H  | -5.01638400 | 3.71859500  | 2.03847900  |
| H  | -4.12197600 | 2.85022600  | 3.29618800  |
| C  | -4.66182700 | 2.00147400  | -3.42162800 |
| H  | -3.97959700 | 1.67667200  | -4.21114700 |
| H  | -5.69354600 | 1.97493500  | -3.77431700 |
| H  | -4.39821300 | 3.03082700  | -3.15495500 |
| C  | -4.19201200 | -3.76311800 | -2.37048800 |
| H  | -3.29047200 | -4.35599300 | -2.20277500 |
| H  | -5.08507200 | -4.36088400 | -2.18198300 |
| H  | -4.19571900 | -3.44524200 | -3.41924000 |
| C  | -3.63106100 | -2.64915800 | 3.36708300  |
| H  | -2.80359100 | -3.34671600 | 3.22000900  |
| H  | -3.37796400 | -1.98931700 | 4.20440600  |
| H  | -4.54506800 | -3.19158900 | 3.61286700  |

## 2-TS4-1-smd

O 1

|    |             |             |             |
|----|-------------|-------------|-------------|
| Br | -5.75953200 | -3.48174700 | -0.14704600 |
| O  | 0.99029600  | -2.40776500 | 2.38135000  |
| C  | -1.89850600 | -2.65936900 | 1.21230700  |
| H  | -1.41709900 | -2.49763000 | 2.16827300  |
| O  | 0.58972800  | -1.06578900 | -0.88913400 |
| C  | -3.26156500 | -2.94791600 | 1.16491900  |
| H  | -3.83914400 | -3.01261800 | 2.08060700  |
| O  | 2.58281600  | -0.07099300 | -1.43684400 |
| N  | 3.19099500  | -0.59479200 | 1.38002500  |

|    |             |             |             |
|----|-------------|-------------|-------------|
| C  | -3.87345400 | -3.13548500 | -0.07386700 |
| N  | 4.03365800  | -0.21577400 | 2.03187300  |
| C  | -3.14594800 | -3.06878600 | -1.26126200 |
| H  | -3.63327400 | -3.22370600 | -2.21734100 |
| C  | -1.78250700 | -2.79457000 | -1.19891500 |
| H  | -1.20725600 | -2.73313500 | -2.11780100 |
| C  | -1.14800800 | -2.56763500 | 0.03164200  |
| C  | 0.29270400  | -2.24456700 | 0.03389600  |
| C  | 1.08145800  | -1.94248300 | 1.25669700  |
| C  | 2.16015400  | -1.05333900 | 0.72317900  |
| C  | 1.85932300  | -0.77301200 | -0.63763200 |
| C  | 2.16820500  | -0.01952300 | -2.84268300 |
| H  | 1.25938900  | 0.57692100  | -2.93152300 |
| H  | 2.02483300  | -1.04526600 | -3.18357300 |
| H  | 3.00061600  | 0.45966400  | -3.35417000 |
| Rh | -0.65205700 | 1.03363500  | -0.28801100 |
| C  | -1.43296000 | 0.87398100  | 2.48976900  |
| O  | -0.83917600 | 0.21843900  | 1.57059800  |
| C  | -3.53131800 | 0.96917200  | -0.59426000 |
| O  | -3.55836700 | 2.11591300  | -0.03347400 |
| C  | -0.97551100 | 3.13655600  | -2.25153600 |
| O  | -1.57025400 | 3.79982500  | -1.34098900 |
| C  | 1.09829000  | 3.04056500  | 0.86228500  |
| O  | 1.11864800  | 1.88572000  | 0.31727600  |
| Rh | -1.78338600 | 2.97555900  | 0.52976400  |
| O  | 0.05210400  | 3.73536300  | 1.07226900  |
| O  | -2.47741200 | 0.30157500  | -0.85434400 |
| O  | -0.48924000 | 1.96291400  | -2.11279400 |
| O  | -1.92982400 | 2.04044600  | 2.35550300  |
| C  | -1.58185800 | 0.19251400  | 3.82211100  |
| H  | -2.53514600 | -0.34817000 | 3.82936800  |
| H  | -0.77480900 | -0.52730500 | 3.97018500  |
| H  | -1.59842700 | 0.92793200  | 4.62867100  |
| C  | 2.42790800  | 3.62433000  | 1.25771600  |
| H  | 2.92650200  | 4.00035100  | 0.35727600  |
| H  | 2.29754500  | 4.44748400  | 1.96133700  |
| H  | 3.06284100  | 2.84748500  | 1.69139400  |
| C  | -0.81154000 | 3.78243200  | -3.60093800 |
| H  | -1.37800500 | 4.71236100  | -3.65905700 |
| H  | 0.25046800  | 3.99212200  | -3.76742000 |
| H  | -1.14035100 | 3.09049300  | -4.38116300 |
| C  | -4.84770500 | 0.33536900  | -0.95389100 |
| H  | -4.76286600 | -0.19257100 | -1.90574000 |
| H  | -5.10160000 | -0.40360200 | -0.18687700 |

|   |             |             |             |
|---|-------------|-------------|-------------|
| H | -5.63815700 | 1.08579700  | -0.99942400 |
| C | 5.28264300  | -2.45610300 | -0.01624700 |
| C | 4.50738400  | -2.80522200 | -1.05452200 |
| H | 5.00831900  | -2.83257800 | 0.97054000  |
| H | 4.72248900  | -2.44538200 | -2.06010600 |
| C | 3.25340400  | -3.63287900 | -0.94278600 |
| H | 3.39979400  | -4.59517000 | -1.47101600 |
| H | 3.08557100  | -3.89487000 | 0.12061400  |
| O | 2.16677500  | -2.94000300 | -1.49874100 |
| H | 1.12283000  | -2.95804500 | -0.66521400 |
| C | 6.46580600  | -1.58202400 | -0.03128300 |
| C | 7.08516700  | -1.26002500 | 1.19105900  |
| C | 7.00260000  | -1.02565300 | -1.20958900 |
| C | 8.19224300  | -0.41196700 | 1.23985500  |
| H | 6.68659400  | -1.67887100 | 2.11168100  |
| C | 8.10708900  | -0.17912700 | -1.16112300 |
| H | 6.55331800  | -1.25799300 | -2.17037400 |
| C | 8.70912700  | 0.13318200  | 0.06329600  |
| H | 8.65100200  | -0.17922600 | 2.19698600  |
| H | 8.50430600  | 0.23790000  | -2.08276000 |
| H | 9.57120500  | 0.79336300  | 0.09653300  |

## 2-TS4-2-smd

0 1

|    |             |             |             |
|----|-------------|-------------|-------------|
| Br | -1.46807400 | 5.43810600  | -1.15847500 |
| O  | -0.86093500 | -1.28379800 | 1.66752100  |
| C  | -1.12879300 | 1.55240700  | 0.34932400  |
| H  | -1.22549800 | 1.06474900  | 1.31220300  |
| O  | -0.17442600 | -1.34870500 | -1.85156700 |
| C  | -1.31904600 | 2.92384600  | 0.23915400  |
| H  | -1.57495100 | 3.50696600  | 1.11686000  |
| O  | 0.93385300  | -3.36653700 | -2.15934100 |
| N  | 0.29285400  | -3.82308900 | 0.58274300  |
| C  | -1.19387400 | 3.54071000  | -1.00840300 |
| N  | 0.61717600  | -4.71232200 | 1.22712700  |
| C  | -0.88177600 | 2.79770700  | -2.14599100 |
| H  | -0.78703600 | 3.28321200  | -3.11143300 |
| C  | -0.68302400 | 1.42341500  | -2.03303800 |
| H  | -0.42453200 | 0.84676700  | -2.91442200 |
| C  | -0.79268200 | 0.77331100  | -0.78425900 |
| C  | -0.61186300 | -0.65434700 | -0.66711100 |
| C  | -0.55222200 | -1.50265700 | 0.48192600  |
| C  | -0.11300100 | -2.80795000 | -0.09110800 |
| C  | -0.12170900 | -2.71715400 | -1.58446100 |



|    |              |              |              |
|----|--------------|--------------|--------------|
| C  | 1. 14994100  | -3. 06941300 | -3. 55067700 |
| H  | 1. 48200000  | -2. 03526100 | -3. 66657000 |
| H  | 0. 23937700  | -3. 24310600 | -4. 13285400 |
| H  | 1. 93187700  | -3. 75315700 | -3. 88286000 |
| Rh | 2. 35068400  | -0. 03688500 | 0. 27338800  |
| C  | 2. 80567900  | 1. 35541900  | 2. 77434600  |
| O  | 1. 87488000  | 0. 87898000  | 2. 04883300  |
| C  | 3. 35865600  | 2. 49225800  | -0. 72831800 |
| O  | 4. 48691300  | 2. 18226700  | -0. 21812500 |
| C  | 4. 21168900  | -0. 98668200 | -1. 73427800 |
| O  | 5. 14906300  | -0. 54388500 | -0. 98998200 |
| C  | 3. 66198900  | -2. 13814900 | 1. 78394200  |
| O  | 2. 54390800  | -1. 83643800 | 1. 25487600  |
| Rh | 4. 66002500  | 0. 38893800  | 0. 77422400  |
| O  | 4. 71854900  | -1. 42336600 | 1. 73835700  |
| O  | 2. 30510200  | 1. 78022100  | -0. 67794900 |
| O  | 2. 96537700  | -0. 90386200 | -1. 48721700 |
| O  | 4. 05433800  | 1. 29334200  | 2. 51409400  |
| C  | 2. 39439600  | 2. 08305400  | 4. 02660100  |
| H  | 2. 16675600  | 3. 12258300  | 3. 76391700  |
| H  | 1. 49249000  | 1. 63301700  | 4. 44615300  |
| H  | 3. 20325700  | 2. 07793900  | 4. 75925800  |
| C  | 3. 73665400  | -3. 42669500 | 2. 55821000  |
| H  | 2. 98739000  | -4. 13293500 | 2. 19757500  |
| H  | 4. 73854800  | -3. 85531700 | 2. 48967600  |
| H  | 3. 52770600  | -3. 20777400 | 3. 61167600  |
| C  | 4. 60851500  | -1. 68969300 | -3. 00672500 |
| H  | 5. 66238100  | -1. 52110200 | -3. 23167400 |
| H  | 4. 43393400  | -2. 76374400 | -2. 88284400 |
| H  | 3. 98525700  | -1. 34140000 | -3. 83390200 |
| C  | 3. 26305600  | 3. 79379800  | -1. 48064000 |
| H  | 3. 24836100  | 3. 57658400  | -2. 55441500 |
| H  | 2. 32784300  | 4. 30029500  | -1. 23043000 |
| H  | 4. 11616000  | 4. 43606700  | -1. 25777100 |
| C  | -4. 39280500 | 1. 50711200  | -0. 94252500 |
| C  | -4. 68232900 | 0. 24267400  | -1. 29257500 |
| H  | -3. 57209500 | 2. 00636100  | -1. 45601600 |
| H  | -5. 48982800 | -0. 31235300 | -0. 82272600 |
| C  | -3. 85294200 | -0. 51662200 | -2. 26364400 |
| H  | -4. 43417000 | -1. 14368500 | -2. 94238000 |
| H  | -3. 15460100 | 0. 10987800  | -2. 82184200 |
| O  | -3. 05356600 | -1. 49176500 | -1. 46036200 |
| H  | -2. 31816900 | -1. 01526500 | -0. 91260400 |
| C  | -5. 06925100 | 2. 31191100  | 0. 08248000  |

|   |             |             |             |
|---|-------------|-------------|-------------|
| C | -4.80120900 | 3.69151700  | 0.14208100  |
| C | -5.94727600 | 1.75684400  | 1.03429600  |
| C | -5.40171600 | 4.49730600  | 1.10873900  |
| H | -4.10953600 | 4.13060300  | -0.57072600 |
| C | -6.54517900 | 2.56283500  | 1.99958800  |
| H | -6.14337900 | 0.68872700  | 1.03752800  |
| C | -6.27779400 | 3.93597600  | 2.04008500  |
| H | -5.17875500 | 5.56015500  | 1.13777500  |
| H | -7.21440500 | 2.11848700  | 2.73113000  |
| H | -6.74204600 | 4.55926100  | 2.79913000  |
| C | -4.01344500 | -4.22605400 | -0.67126100 |
| C | -2.69833400 | -4.46897000 | -0.55924200 |
| H | -4.47896800 | -4.30723600 | -1.65526200 |
| H | -2.22882400 | -4.44027500 | 0.41937600  |
| C | -1.80316200 | -4.57814300 | -1.75800400 |
| H | -0.90267700 | -5.17285000 | -1.58363300 |
| H | -2.32872500 | -4.99022700 | -2.62312200 |
| O | -1.38318700 | -3.23166600 | -2.18561500 |
| H | -2.49198300 | -2.20909500 | -1.95787700 |
| C | -4.89119600 | -3.76073900 | 0.41295100  |
| C | -6.27817900 | -3.98322500 | 0.34321400  |
| C | -4.38342100 | -3.00483800 | 1.48860900  |
| C | -7.13124300 | -3.49497800 | 1.33288500  |
| H | -6.68498200 | -4.54717200 | -0.49281600 |
| C | -5.23825900 | -2.51521600 | 2.47460000  |
| H | -3.32522000 | -2.76269100 | 1.53318600  |
| C | -6.61372700 | -2.75981500 | 2.40301800  |
| H | -8.19932100 | -3.68278700 | 1.26655900  |
| H | -4.83111100 | -1.92496000 | 3.29067100  |
| H | -7.27772600 | -2.37035000 | 3.16959800  |

2-TS4-3-smd

0 1

|    |             |             |             |
|----|-------------|-------------|-------------|
| Rh | -2.39971400 | -0.66899500 | -0.05440300 |
| C  | -3.91351600 | -1.82535700 | -2.23442700 |
| O  | -2.72724200 | -1.69980000 | -1.78782900 |
| C  | -3.92562800 | -2.68068300 | 1.37717000  |
| O  | -4.97284900 | -2.00535000 | 1.10216300  |
| C  | -3.27525400 | 0.83384800  | 2.27604800  |
| O  | -4.45860500 | 0.74957100  | 1.80881400  |
| C  | -3.25181600 | 1.78471900  | -1.36439800 |
| O  | -2.20582700 | 1.08767900  | -1.13134600 |
| Rh | -4.75880400 | -0.25804300 | 0.04455600  |
| O  | -4.43457900 | 1.47527500  | -1.00992300 |

|    |             |             |             |
|----|-------------|-------------|-------------|
| O  | -2.73833700 | -2.37232100 | 1.03240000  |
| O  | -2.22322000 | 0.39248100  | 1.70550400  |
| O  | -4.95924400 | -1.32139500 | -1.70329800 |
| C  | -4.07737000 | -2.61283200 | -3.50614800 |
| H  | -5.10208100 | -2.97295200 | -3.60933100 |
| H  | -3.37243100 | -3.44718000 | -3.51494000 |
| H  | -3.84473200 | -1.96162600 | -4.35627600 |
| C  | -3.06326700 | 3.09102400  | -2.08893800 |
| H  | -2.67661800 | 3.83595700  | -1.38498400 |
| H  | -4.01386500 | 3.44644200  | -2.48821300 |
| H  | -2.33176300 | 2.97553700  | -2.89126000 |
| C  | -3.11640200 | 1.49550300  | 3.61892000  |
| H  | -3.60390300 | 2.47405300  | 3.61135700  |
| H  | -2.06304800 | 1.59632300  | 3.88163500  |
| H  | -3.61953400 | 0.87994200  | 4.37205000  |
| C  | -4.09082600 | -3.92883200 | 2.20095500  |
| H  | -3.37953800 | -4.69012300 | 1.87384600  |
| H  | -5.11341700 | -4.30328000 | 2.13471300  |
| H  | -3.87126600 | -3.68591600 | 3.24678200  |
| Br | -0.86384900 | -5.21269700 | -2.25637900 |
| O  | 0.75571100  | 0.38422400  | 2.06865200  |
| C  | 0.31417900  | -2.01460300 | 0.14658400  |
| H  | 0.33861900  | -1.80860100 | 1.20713000  |
| O  | 1.19034100  | 1.25274500  | -1.35343300 |
| C  | -0.14814900 | -3.26108600 | -0.28742300 |
| H  | -0.50182000 | -3.97975400 | 0.43947200  |
| O  | 0.12692700  | 3.22097700  | -1.66122500 |
| N  | -0.70055900 | 2.85604600  | 1.10733000  |
| C  | -0.16734300 | -3.53499800 | -1.64677600 |
| N  | -1.44914300 | 3.43338000  | 1.71974700  |
| C  | 0.28936900  | -2.60498300 | -2.58234900 |
| H  | 0.27013300  | -2.83372500 | -3.64209200 |
| C  | 0.76798500  | -1.37556300 | -2.14145400 |
| H  | 1.13704500  | -0.65900100 | -2.86651400 |
| C  | 0.77490400  | -1.06396200 | -0.77194900 |
| C  | 1.38551700  | 0.22981300  | -0.29535600 |
| C  | 0.74588200  | 0.83855700  | 0.94650600  |
| C  | 0.15124300  | 2.09840900  | 0.45796700  |
| C  | 0.50088100  | 2.25548100  | -0.90344200 |
| C  | 0.71476200  | 3.30403700  | -2.99966800 |
| H  | 1.79311900  | 3.41176800  | -2.87969300 |
| H  | 0.45728700  | 2.41016400  | -3.56969800 |
| H  | 0.26863500  | 4.19162500  | -3.44233900 |
| C  | 2.83036700  | -2.31105900 | 2.44192800  |

|   |             |             |             |
|---|-------------|-------------|-------------|
| C | 3.70151900  | -1.99268800 | 1.47162500  |
| H | 2.62202000  | -1.56374000 | 3.20714500  |
| H | 3.88726400  | -2.67968800 | 0.64587200  |
| C | 4.41601600  | -0.67235800 | 1.35941100  |
| H | 5.50407700  | -0.84389200 | 1.49784800  |
| H | 4.11020700  | -0.02199500 | 2.20196800  |
| O | 4.16368200  | -0.09248000 | 0.10461600  |
| H | 2.50967500  | 0.12428000  | -0.13970200 |
| C | 2.02181200  | -3.53787200 | 2.53127400  |
| C | 0.85998700  | -3.52904700 | 3.32680700  |
| C | 2.31190500  | -4.70735300 | 1.80218400  |
| C | 0.00213800  | -4.62912900 | 3.36647000  |
| H | 0.61798300  | -2.63613200 | 3.89846900  |
| C | 1.45863800  | -5.80823000 | 1.84494200  |
| H | 3.21158000  | -4.75208900 | 1.19585700  |
| C | 0.29485600  | -5.77458300 | 2.62132900  |
| H | -0.89517500 | -4.59062100 | 3.97840000  |
| H | 1.70050300  | -6.69692400 | 1.26815800  |
| H | -0.36976700 | -6.63350200 | 2.65023800  |
| C | 8.23384400  | 1.44349500  | -0.56118200 |
| C | 6.91488000  | 1.24975900  | -0.70660400 |
| H | 8.60671700  | 2.46904000  | -0.55076600 |
| H | 6.48678700  | 0.24865000  | -0.70955200 |
| C | 5.89326600  | 2.34660200  | -0.84968500 |
| H | 5.47944600  | 2.30837500  | -1.87777700 |
| H | 6.37960100  | 3.33013800  | -0.75130900 |
| O | 4.86580800  | 2.22129800  | 0.11658900  |
| H | 4.53025700  | 1.10683700  | 0.12924400  |
| C | 9.26904300  | 0.40771300  | -0.40561800 |
| C | 10.61611400 | 0.79877900  | -0.29014400 |
| C | 8.97851800  | -0.97085200 | -0.35751900 |
| C | 11.63388500 | -0.14335300 | -0.13427100 |
| H | 10.86349600 | 1.85745100  | -0.32219500 |
| C | 9.99342700  | -1.91131400 | -0.20078300 |
| H | 7.95031600  | -1.30958600 | -0.44004700 |
| C | 11.32785300 | -1.50476000 | -0.08878800 |
| H | 12.66569600 | 0.18698300  | -0.04750500 |
| H | 9.74319700  | -2.96843200 | -0.16475200 |
| H | 12.11675800 | -2.24176200 | 0.03299300  |
| C | 0.56262200  | 5.70004700  | 0.83800000  |
| C | 1.49701200  | 5.41281900  | -0.07963900 |
| H | 0.76955900  | 5.44483800  | 1.87828900  |
| H | 1.33969900  | 5.65977000  | -1.12788800 |
| C | 2.76619500  | 4.66717700  | 0.20401600  |

|   |             |            |             |
|---|-------------|------------|-------------|
| H | 3.63755400  | 5.30481900 | -0.02994500 |
| H | 2.83072800  | 4.42384700 | 1.27697200  |
| O | 2.77337900  | 3.49734400 | -0.60204500 |
| H | 3.60751500  | 2.96651100 | -0.34635900 |
| C | -0.76684000 | 6.28219500 | 0.59589000  |
| C | -1.56640800 | 6.64323400 | 1.69652900  |
| C | -1.31445900 | 6.43099200 | -0.69495100 |
| C | -2.85775100 | 7.14213700 | 1.51969200  |
| H | -1.16674500 | 6.52614300 | 2.70075000  |
| C | -2.60348500 | 6.92863700 | -0.87154500 |
| H | -0.73372000 | 6.14135100 | -1.56497300 |
| C | -3.38309400 | 7.28705600 | 0.23451900  |
| H | -3.45362000 | 7.41328900 | 2.38671500  |
| H | -3.00624400 | 7.03097500 | -1.87556500 |
| H | -4.38984900 | 7.66934400 | 0.09322500  |

### 3-TS-smd

O 1

|    |             |             |             |
|----|-------------|-------------|-------------|
| C  | 0.88752400  | 2.20524100  | -0.10267600 |
| C  | -0.70107400 | 0.74336600  | -0.96058600 |
| H  | -0.49687300 | 0.68906600  | -2.03978800 |
| C  | -2.10918200 | 0.29909600  | -0.65712800 |
| C  | -2.69305400 | -0.71374900 | -1.42416900 |
| C  | -2.81259400 | 0.83912200  | 0.42421800  |
| C  | -3.97046600 | -1.18430800 | -1.12325200 |
| H  | -2.15241200 | -1.13980700 | -2.26408100 |
| C  | -4.09398900 | 0.38352600  | 0.73148400  |
| H  | -2.35857900 | 1.62285000  | 1.02028200  |
| C  | -4.65763000 | -0.62606400 | -0.04672000 |
| H  | -4.42256200 | -1.96754400 | -1.72091400 |
| H  | -4.64203700 | 0.80720300  | 1.56545000  |
| Br | -6.42112500 | -1.25733300 | 0.36991400  |
| O  | -0.46664400 | 2.06734700  | -0.47217700 |
| C  | 0.35110000  | -0.13536400 | -0.23637800 |
| O  | 0.33789100  | -1.34454500 | -0.15303500 |
| C  | 1.37902200  | 0.80778500  | 0.28268500  |
| N  | 1.94860200  | 0.57943400  | 1.48475300  |
| N  | 3.01107000  | 0.38482000  | 1.91942400  |
| O  | 1.04162900  | 3.09049900  | 0.93731300  |
| C  | 0.64031200  | 4.44242800  | 0.64640000  |
| H  | -0.43354500 | 4.49344300  | 0.44177700  |
| H  | 0.87105100  | 5.01885000  | 1.54320700  |
| H  | 1.19649200  | 4.84241900  | -0.20612700 |
| O  | 1.57276900  | 2.58977300  | -1.27469300 |

|   |            |             |             |
|---|------------|-------------|-------------|
| C | 2.97134100 | 2.27099500  | -1.17825600 |
| H | 3.39315900 | 2.53470300  | -2.15250400 |
| H | 3.45097000 | 2.89008400  | -0.40911200 |
| C | 3.15144200 | 0.80159400  | -0.86894700 |
| C | 4.17405000 | 0.37200600  | -0.01870000 |
| H | 2.79534100 | 0.11981900  | -1.63835800 |
| H | 4.82712600 | 1.13099500  | 0.40700200  |
| C | 4.67371200 | -1.01108600 | 0.02524400  |
| C | 6.01071200 | -1.26229400 | 0.38196200  |
| C | 3.83981500 | -2.11071800 | -0.25611400 |
| C | 6.50719600 | -2.56442000 | 0.42874900  |
| H | 6.66383100 | -0.42552400 | 0.61651500  |
| C | 4.33870300 | -3.41091000 | -0.20974000 |
| H | 2.78842700 | -1.94760200 | -0.47524900 |
| C | 5.67518800 | -3.64541800 | 0.12767700  |
| H | 7.54518200 | -2.73509800 | 0.70094700  |
| H | 3.67809600 | -4.24620000 | -0.42540300 |
| H | 6.06007100 | -4.66033200 | 0.16635800  |
